# Supplementary material for: Characterization of gut microbiota in adults with coronary atherosclerosis
Source: PeerJ journal article supplement (doi:10.7717/peerj.15245), 2023-05-18
Supplement: Raw_Data.zip [file Figure1A_rare_curve_data.xls]

sample	numsampled	Value
Case01	0	0
Case02	0	0
Case03	0	0
Case04	0	0
Case05	0	0
Case06	0	0
Case07	0	0
Case08	0	0
Case09	0	0
Case10	0	0
Case11	0	0
Case12	0	0
Case13	0	0
Case14	0	0
Case15	0	0
Case16	0	0
Case17	0	0
Case18	0	0
Case19	0	0
Case20	0	0
Case21	0	0
Case22	0	0
Case23	0	0
Case24	0	0
Case25	0	0
Case26	0	0
Case27	0	0
Case28	0	0
Case29	0	0
Case30	0	0
Case31	0	0
Case32	0	0
Case33	0	0
Case34	0	0
Case35	0	0
Con01	0	0
Con02	0	0
Con03	0	0
Con04	0	0
Con05	0	0
Con06	0	0
Con07	0	0
Con08	0	0
Con09	0	0
Con10	0	0
Con11	0	0
Con12	0	0
Con13	0	0
Con14	0	0
Con15	0	0
Con16	0	0
Con17	0	0
Con18	0	0
Con19	0	0
Con20	0	0
Con21	0	0
Con22	0	0
Con23	0	0
Con24	0	0
Con25	0	0
Con26	0	0
Con27	0	0
Con28	0	0
Con29	0	0
Con30	0	0
Con31	0	0
Con32	0	0
Case01	250	35.9383
Case02	250	32.0682
Case03	250	35.3579
Case04	250	45.3142
Case05	250	25.4816
Case06	250	23.9903
Case07	250	27.1983
Case08	250	36.3801
Case09	250	35.9643
Case10	250	37.2376
Case11	250	31.6402
Case12	250	33.5758
Case13	250	41.3031
Case14	250	39.7989
Case15	250	48.5844
Case16	250	37.8556
Case17	250	39.193
Case18	250	43.5042
Case19	250	23.8739
Case20	250	23.775
Case21	250	36.7177
Case22	250	25.739
Case23	250	28.5831
Case24	250	51.439
Case25	250	37.2662
Case26	250	56.6642
Case27	250	41.5934
Case28	250	43.7039
Case29	250	34.6788
Case30	250	12.5163
Case31	250	51.142
Case32	250	36.7927
Case33	250	41.6094
Case34	250	36.258
Case35	250	41.6855
Con01	250	47.8227
Con02	250	44.5939
Con03	250	26.7089
Con04	250	52.939
Con05	250	35.8397
Con06	250	43.8694
Con07	250	31.9132
Con08	250	43.3514
Con09	250	41.3717
Con10	250	34.3444
Con11	250	35.2469
Con12	250	30.9927
Con13	250	48.288
Con14	250	29.5014
Con15	250	40.0692
Con16	250	42.2999
Con17	250	50.5903
Con18	250	34.6419
Con19	250	37.2309
Con20	250	34.1749
Con21	250	38.0349
Con22	250	45.762
Con23	250	37.3033
Con24	250	21.633
Con25	250	37.3369
Con26	250	44.0534
Con27	250	35.9542
Con28	250	48.1203
Con29	250	33.4953
Con30	250	29.6135
Con31	250	49.6891
Con32	250	27.4516
Case01	500	49.1175
Case02	500	41.6811
Case03	500	46.5029
Case04	500	62.8236
Case05	500	33.7382
Case06	500	31.5674
Case07	500	35.1364
Case08	500	51.6741
Case09	500	51.2638
Case10	500	51.5641
Case11	500	42.0116
Case12	500	44.8452
Case13	500	56.3663
Case14	500	54.6499
Case15	500	67.2301
Case16	500	49.7133
Case17	500	55.3505
Case18	500	63.7163
Case19	500	33.3243
Case20	500	34.9352
Case21	500	48.8376
Case22	500	37.0559
Case23	500	37.5231
Case24	500	69.7233
Case25	500	48.8585
Case26	500	77.5897
Case27	500	57.2985
Case28	500	60.0264
Case29	500	47.039
Case30	500	19.9241
Case31	500	70.7634
Case32	500	50.4205
Case33	500	60.6081
Case34	500	53.4841
Case35	500	56.7085
Con01	500	66.2313
Con02	500	68.1842
Con03	500	37.5261
Con04	500	71.4444
Con05	500	44.3064
Con06	500	61.388
Con07	500	42.1141
Con08	500	57.8093
Con09	500	58.355
Con10	500	43.4761
Con11	500	48.0366
Con12	500	39.6048
Con13	500	69.8967
Con14	500	44.8911
Con15	500	52.7195
Con16	500	58.6421
Con17	500	71.0434
Con18	500	49.4861
Con19	500	51.171
Con20	500	43.8528
Con21	500	51.8306
Con22	500	62.2659
Con23	500	50.334
Con24	500	28.8993
Con25	500	50.2947
Con26	500	59.7744
Con27	500	50.7648
Con28	500	65.0716
Con29	500	46.5537
Con30	500	39.8255
Con31	500	65.6901
Con32	500	40.1703
Case01	750	58.0277
Case02	750	47.7932
Case03	750	54.3515
Case04	750	74.3373
Case05	750	39.4591
Case06	750	36.8991
Case07	750	40.833
Case08	750	62.6092
Case09	750	61.1419
Case10	750	62.726
Case11	750	49.5376
Case12	750	52.8406
Case13	750	67.0424
Case14	750	64.8993
Case15	750	80.8142
Case16	750	58.7787
Case17	750	65.9558
Case18	750	77.6068
Case19	750	40.2206
Case20	750	43.9497
Case21	750	57.1377
Case22	750	44.96
Case23	750	44.8441
Case24	750	81.7798
Case25	750	56.505
Case26	750	90.2805
Case27	750	68.3896
Case28	750	72.0734
Case29	750	55.7384
Case30	750	25.8656
Case31	750	83.6557
Case32	750	61.5428
Case33	750	73.9475
Case34	750	66.4252
Case35	750	67.1536
Con01	750	78.1202
Con02	750	84.418
Con03	750	44.7683
Con04	750	82.5702
Con05	750	49.7596
Con06	750	73.325
Con07	750	49.5382
Con08	750	67.1765
Con09	750	70.3895
Con10	750	49.2561
Con11	750	56.2981
Con12	750	45.0609
Con13	750	84.385
Con14	750	56.2521
Con15	750	60.0913
Con16	750	69.2201
Con17	750	85.5368
Con18	750	60.9448
Con19	750	59.6901
Con20	750	49.978
Con21	750	62.0404
Con22	750	74.5092
Con23	750	58.6924
Con24	750	34.0033
Con25	750	60.7614
Con26	750	68.8605
Con27	750	60.6129
Con28	750	74.9802
Con29	750	56.7271
Con30	750	46.86
Con31	750	76.0767
Con32	750	49.7486
Case01	1000	65.2123
Case02	1000	53.191
Case03	1000	60.6909
Case04	1000	83.3268
Case05	1000	43.9546
Case06	1000	40.9981
Case07	1000	45.1737
Case08	1000	70.8674
Case09	1000	68.2442
Case10	1000	72.0033
Case11	1000	56.1252
Case12	1000	59.2401
Case13	1000	75.092
Case14	1000	73.3309
Case15	1000	92.1998
Case16	1000	65.9699
Case17	1000	75.4451
Case18	1000	89.3245
Case19	1000	46.0926
Case20	1000	50.7505
Case21	1000	63.7302
Case22	1000	51.9354
Case23	1000	49.6525
Case24	1000	91.0414
Case25	1000	61.8349
Case26	1000	100.025
Case27	1000	76.4654
Case28	1000	81.3907
Case29	1000	62.2501
Case30	1000	30.9045
Case31	1000	93.5475
Case32	1000	69.9311
Case33	1000	84.9938
Case34	1000	76.9699
Case35	1000	75.2965
Con01	1000	88.06
Con02	1000	96.5096
Con03	1000	50.0909
Con04	1000	91.1619
Con05	1000	54.389
Con06	1000	82.046
Con07	1000	54.8611
Con08	1000	73.9491
Con09	1000	78.2433
Con10	1000	53.5083
Con11	1000	62.8671
Con12	1000	49.7502
Con13	1000	95.7564
Con14	1000	64.9299
Con15	1000	66.7492
Con16	1000	77.0986
Con17	1000	97.0712
Con18	1000	69.9112
Con19	1000	65.9744
Con20	1000	54.3389
Con21	1000	69.2953
Con22	1000	83.7435
Con23	1000	64.2083
Con24	1000	37.9806
Con25	1000	67.9266
Con26	1000	76.9316
Con27	1000	67.3775
Con28	1000	82.2199
Con29	1000	64.4822
Con30	1000	51.7843
Con31	1000	83.9165
Con32	1000	56.9945
Case01	1250	70.595
Case02	1250	56.9486
Case03	1250	65.7312
Case04	1250	90.7661
Case05	1250	47.0295
Case06	1250	44.2763
Case07	1250	49.4868
Case08	1250	77.9899
Case09	1250	75.4099
Case10	1250	79.7568
Case11	1250	61.2882
Case12	1250	65.0361
Case13	1250	81.9688
Case14	1250	80.1193
Case15	1250	100.299
Case16	1250	71.6852
Case17	1250	82.4869
Case18	1250	97.9141
Case19	1250	50.9519
Case20	1250	57.1401
Case21	1250	69.1396
Case22	1250	57.7268
Case23	1250	53.7928
Case24	1250	98.436
Case25	1250	66.9098
Case26	1250	108.51
Case27	1250	82.8624
Case28	1250	88.2017
Case29	1250	68.0969
Case30	1250	35.3459
Case31	1250	102.145
Case32	1250	77.5423
Case33	1250	93.3743
Case34	1250	86.9961
Case35	1250	81.7702
Con01	1250	96.1774
Con02	1250	107.343
Con03	1250	54.0841
Con04	1250	98.5092
Con05	1250	58.1495
Con06	1250	89.7743
Con07	1250	59.0491
Con08	1250	79.2275
Con09	1250	85.002
Con10	1250	57.2229
Con11	1250	68.2285
Con12	1250	53.3186
Con13	1250	104.293
Con14	1250	71.7002
Con15	1250	71.7295
Con16	1250	82.6858
Con17	1250	105.662
Con18	1250	77.7036
Con19	1250	70.8763
Con20	1250	58.0176
Con21	1250	74.9807
Con22	1250	90.2115
Con23	1250	68.3679
Con24	1250	41.3504
Con25	1250	74.1377
Con26	1250	82.6871
Con27	1250	73.3955
Con28	1250	87.7989
Con29	1250	70.8724
Con30	1250	56.176
Con31	1250	90.2524
Con32	1250	62.7215
Case01	1500	75.3159
Case02	1500	60.4368
Case03	1500	70.2134
Case04	1500	96.825
Case05	1500	49.7966
Case06	1500	47.5299
Case07	1500	52.6762
Case08	1500	83.8772
Case09	1500	80.9017
Case10	1500	86.1732
Case11	1500	65.772
Case12	1500	70.2193
Case13	1500	87.8833
Case14	1500	85.3197
Case15	1500	108.055
Case16	1500	76.7095
Case17	1500	88.3915
Case18	1500	105.499
Case19	1500	55.157
Case20	1500	61.7802
Case21	1500	74.1516
Case22	1500	62.6939
Case23	1500	57.809
Case24	1500	105.549
Case25	1500	70.2956
Case26	1500	115.278
Case27	1500	88.1315
Case28	1500	94.8824
Case29	1500	72.8521
Case30	1500	39.4937
Case31	1500	109.571
Case32	1500	83.4613
Case33	1500	100.756
Case34	1500	95.959
Case35	1500	86.7788
Con01	1500	103.634
Con02	1500	116.393
Con03	1500	58.1201
Con04	1500	103.709
Con05	1500	61.587
Con06	1500	96.3659
Con07	1500	62.8451
Con08	1500	84.2644
Con09	1500	90.6406
Con10	1500	60.79
Con11	1500	72.9748
Con12	1500	56.9702
Con13	1500	111.96
Con14	1500	77.8751
Con15	1500	76.4491
Con16	1500	87.9311
Con17	1500	112.695
Con18	1500	84.0169
Con19	1500	75.6269
Con20	1500	61.2815
Con21	1500	79.6908
Con22	1500	95.4132
Con23	1500	72.1055
Con24	1500	43.9828
Con25	1500	79.5827
Con26	1500	87.8155
Con27	1500	77.9873
Con28	1500	92.3032
Con29	1500	76.3147
Con30	1500	59.8161
Con31	1500	95.5291
Con32	1500	67.6673
Case01	1750	79.5582
Case02	1750	63.9734
Case03	1750	74.006
Case04	1750	102.238
Case05	1750	52.1296
Case06	1750	50.4089
Case07	1750	55.9504
Case08	1750	89.2192
Case09	1750	86.3608
Case10	1750	92.4114
Case11	1750	69.6278
Case12	1750	74.8421
Case13	1750	93.0535
Case14	1750	90.1569
Case15	1750	114.12
Case16	1750	80.617
Case17	1750	93.8708
Case18	1750	112.249
Case19	1750	58.7677
Case20	1750	66.3103
Case21	1750	78.1537
Case22	1750	67.6474
Case23	1750	61.1617
Case24	1750	111.266
Case25	1750	74.0219
Case26	1750	120.556
Case27	1750	93.0686
Case28	1750	101.019
Case29	1750	77.1951
Case30	1750	43.3683
Case31	1750	115.356
Case32	1750	88.8973
Case33	1750	107.517
Case34	1750	103.193
Case35	1750	91.7958
Con01	1750	109.45
Con02	1750	123.426
Con03	1750	61.5436
Con04	1750	108.535
Con05	1750	65.0089
Con06	1750	101.722
Con07	1750	65.8268
Con08	1750	88.9735
Con09	1750	95.5949
Con10	1750	63.1555
Con11	1750	76.9243
Con12	1750	60.0347
Con13	1750	118.325
Con14	1750	83.44
Con15	1750	80.6591
Con16	1750	92.0956
Con17	1750	118.8
Con18	1750	89.3761
Con19	1750	79.315
Con20	1750	63.9998
Con21	1750	83.3443
Con22	1750	100.846
Con23	1750	75.9415
Con24	1750	46.303
Con25	1750	83.8185
Con26	1750	91.6683
Con27	1750	82.0735
Con28	1750	96.6614
Con29	1750	80.6117
Con30	1750	63.4784
Con31	1750	100.644
Con32	1750	72.2839
Case01	2000	83.1077
Case02	2000	66.7972
Case03	2000	77.2492
Case04	2000	107.26
Case05	2000	54.4717
Case06	2000	53.0439
Case07	2000	59.285
Case08	2000	93.4019
Case09	2000	91.0419
Case10	2000	98.0913
Case11	2000	73.4966
Case12	2000	79.1185
Case13	2000	97.808
Case14	2000	94.8111
Case15	2000	119.488
Case16	2000	84.2452
Case17	2000	98.7889
Case18	2000	118.207
Case19	2000	61.922
Case20	2000	71.0303
Case21	2000	81.9152
Case22	2000	72.1132
Case23	2000	64.2188
Case24	2000	116.51
Case25	2000	77.4873
Case26	2000	125.873
Case27	2000	97.4382
Case28	2000	105.375
Case29	2000	81.1209
Case30	2000	46.5899
Case31	2000	121.028
Case32	2000	93.3069
Case33	2000	112.977
Case34	2000	110.453
Case35	2000	96.195
Con01	2000	114.975
Con02	2000	130.432
Con03	2000	64.9863
Con04	2000	112.969
Con05	2000	68.2192
Con06	2000	106.261
Con07	2000	68.5737
Con08	2000	92.0365
Con09	2000	99.7483
Con10	2000	65.6457
Con11	2000	80.2193
Con12	2000	62.7703
Con13	2000	123.795
Con14	2000	88.0029
Con15	2000	84.3446
Con16	2000	95.9225
Con17	2000	123.979
Con18	2000	95.3597
Con19	2000	82.8196
Con20	2000	66.4568
Con21	2000	87.6173
Con22	2000	105.149
Con23	2000	79.1255
Con24	2000	48.0582
Con25	2000	87.2817
Con26	2000	95.3193
Con27	2000	86.2335
Con28	2000	100.366
Con29	2000	84.2635
Con30	2000	66.8164
Con31	2000	104.128
Con32	2000	76.9036
Case01	2250	86.7974
Case02	2250	69.3805
Case03	2250	79.8852
Case04	2250	111.517
Case05	2250	56.5475
Case06	2250	55.2125
Case07	2250	62.2369
Case08	2250	96.9483
Case09	2250	95.0829
Case10	2250	103.717
Case11	2250	76.6313
Case12	2250	83.0205
Case13	2250	102.3
Case14	2250	99.094
Case15	2250	124.689
Case16	2250	88.0215
Case17	2250	103.052
Case18	2250	123.425
Case19	2250	65.2627
Case20	2250	74.8474
Case21	2250	85.2919
Case22	2250	76.2189
Case23	2250	67.1428
Case24	2250	121.151
Case25	2250	80.6234
Case26	2250	129.996
Case27	2250	101.646
Case28	2250	109.078
Case29	2250	84.4896
Case30	2250	49.4891
Case31	2250	125.405
Case32	2250	97.7298
Case33	2250	118.204
Case34	2250	116.853
Case35	2250	100.72
Con01	2250	119.793
Con02	2250	136.41
Con03	2250	67.5036
Con04	2250	116.426
Con05	2250	70.893
Con06	2250	111.116
Con07	2250	71.2051
Con08	2250	95.8053
Con09	2250	103.52
Con10	2250	68.0585
Con11	2250	83.2002
Con12	2250	65.437
Con13	2250	129.261
Con14	2250	92.5911
Con15	2250	87.471
Con16	2250	99.4606
Con17	2250	129.263
Con18	2250	100.517
Con19	2250	86.342
Con20	2250	68.9415
Con21	2250	90.9264
Con22	2250	109.024
Con23	2250	82.3096
Con24	2250	49.7487
Con25	2250	90.5289
Con26	2250	98.6929
Con27	2250	89.6337
Con28	2250	103.671
Con29	2250	87.7858
Con30	2250	69.6158
Con31	2250	107.544
Con32	2250	80.1051
Case01	2500	90.1481
Case02	2500	72.1996
Case03	2500	82.5432
Case04	2500	115.442
Case05	2500	58.5063
Case06	2500	57.1263
Case07	2500	64.5946
Case08	2500	100.749
Case09	2500	99.3185
Case10	2500	107.96
Case11	2500	79.9456
Case12	2500	86.7086
Case13	2500	106.126
Case14	2500	102.851
Case15	2500	128.418
Case16	2500	91.282
Case17	2500	106.829
Case18	2500	128.004
Case19	2500	68.4834
Case20	2500	78.9422
Case21	2500	88.2173
Case22	2500	79.8997
Case23	2500	69.8646
Case24	2500	124.911
Case25	2500	83.2847
Case26	2500	134.186
Case27	2500	104.999
Case28	2500	113.186
Case29	2500	87.1149
Case30	2500	52.5724
Case31	2500	129.923
Case32	2500	101.528
Case33	2500	123.178
Case34	2500	121.902
Case35	2500	104.443
Con01	2500	124.014
Con02	2500	141.833
Con03	2500	69.9897
Con04	2500	119.328
Con05	2500	73.7987
Con06	2500	114.676
Con07	2500	73.3558
Con08	2500	98.502
Con09	2500	106.742
Con10	2500	70.4058
Con11	2500	86.1613
Con12	2500	67.4006
Con13	2500	134.545
Con14	2500	96.7067
Con15	2500	90.898
Con16	2500	102.355
Con17	2500	133.187
Con18	2500	104.988
Con19	2500	89.3948
Con20	2500	70.5747
Con21	2500	93.6989
Con22	2500	112.122
Con23	2500	84.6618
Con24	2500	51.2622
Con25	2500	93.2721
Con26	2500	101.921
Con27	2500	92.9232
Con28	2500	106.85
Con29	2500	91.0522
Con30	2500	71.7036
Con31	2500	111.154
Con32	2500	83.6003
Case01	2750	92.7507
Case02	2750	74.295
Case03	2750	85.2656
Case04	2750	119.028
Case05	2750	60.2791
Case06	2750	59.6626
Case07	2750	66.9587
Case08	2750	104.191
Case09	2750	102.7
Case10	2750	112.539
Case11	2750	83.1044
Case12	2750	90.078
Case13	2750	110.299
Case14	2750	106.846
Case15	2750	133.226
Case16	2750	94.0777
Case17	2750	110.709
Case18	2750	132.214
Case19	2750	71.54
Case20	2750	82.9492
Case21	2750	91.1159
Case22	2750	82.9345
Case23	2750	71.6872
Case24	2750	128.408
Case25	2750	86.042
Case26	2750	137.859
Case27	2750	108.212
Case28	2750	117.157
Case29	2750	90.0693
Case30	2750	55.2975
Case31	2750	133.782
Case32	2750	105.439
Case33	2750	127.705
Case34	2750	126.592
Case35	2750	108.006
Con01	2750	128.415
Con02	2750	146.746
Con03	2750	72.1029
Con04	2750	122.249
Con05	2750	76.2034
Con06	2750	118.453
Con07	2750	75.5207
Con08	2750	100.875
Con09	2750	109.741
Con10	2750	72.3463
Con11	2750	88.4276
Con12	2750	69.3561
Con13	2750	138.581
Con14	2750	100.349
Con15	2750	93.8274
Con16	2750	105.389
Con17	2750	137.304
Con18	2750	109.586
Con19	2750	92.2554
Con20	2750	72.8534
Con21	2750	97.2113
Con22	2750	114.671
Con23	2750	87.1024
Con24	2750	52.8544
Con25	2750	95.8532
Con26	2750	104.475
Con27	2750	95.3141
Con28	2750	109.326
Con29	2750	94.2181
Con30	2750	74.1776
Con31	2750	114.287
Con32	2750	86.658
Case01	3000	95.1223
Case02	3000	76.5056
Case03	3000	87.664
Case04	3000	122.11
Case05	3000	62.2296
Case06	3000	61.7902
Case07	3000	69.3645
Case08	3000	107.002
Case09	3000	105.708
Case10	3000	116.938
Case11	3000	86.0981
Case12	3000	92.6499
Case13	3000	114.081
Case14	3000	110.313
Case15	3000	137.202
Case16	3000	97.0758
Case17	3000	114.272
Case18	3000	136.263
Case19	3000	73.5655
Case20	3000	86.2524
Case21	3000	93.5866
Case22	3000	85.5685
Case23	3000	73.9742
Case24	3000	131.605
Case25	3000	88.8182
Case26	3000	140.676
Case27	3000	111.086
Case28	3000	120.385
Case29	3000	92.4309
Case30	3000	57.7871
Case31	3000	137.253
Case32	3000	109.047
Case33	3000	131.513
Case34	3000	131.008
Case35	3000	111.347
Con01	3000	132.218
Con02	3000	151.328
Con03	3000	74.2465
Con04	3000	124.903
Con05	3000	78.8877
Con06	3000	121.818
Con07	3000	77.8953
Con08	3000	103.556
Con09	3000	112.969
Con10	3000	74.1615
Con11	3000	90.8559
Con12	3000	71.4483
Con13	3000	142.308
Con14	3000	103.968
Con15	3000	96.4824
Con16	3000	107.774
Con17	3000	140.456
Con18	3000	113.848
Con19	3000	94.9859
Con20	3000	74.9978
Con21	3000	99.7705
Con22	3000	117.318
Con23	3000	89.6493
Con24	3000	54.1409
Con25	3000	98.6283
Con26	3000	107.117
Con27	3000	97.8008
Con28	3000	112.06
Con29	3000	97.3034
Con30	3000	76.4049
Con31	3000	117.29
Con32	3000	89.5214
Case01	3250	97.6575
Case02	3250	78.8269
Case03	3250	89.8822
Case04	3250	125.392
Case05	3250	63.8975
Case06	3250	63.6274
Case07	3250	72.0659
Case08	3250	110.137
Case09	3250	108.969
Case10	3250	120.803
Case11	3250	89.305
Case12	3250	95.2107
Case13	3250	117.198
Case14	3250	113.515
Case15	3250	140.946
Case16	3250	100.079
Case17	3250	117.601
Case18	3250	140.082
Case19	3250	75.5567
Case20	3250	89.3185
Case21	3250	95.9764
Case22	3250	88.742
Case23	3250	76.1974
Case24	3250	134.826
Case25	3250	90.6883
Case26	3250	143.763
Case27	3250	113.969
Case28	3250	123.321
Case29	3250	94.9185
Case30	3250	59.757
Case31	3250	140.829
Case32	3250	112.137
Case33	3250	135.246
Case34	3250	135.481
Case35	3250	114.596
Con01	3250	135.92
Con02	3250	155.411
Con03	3250	76.3228
Con04	3250	127.734
Con05	3250	81.034
Con06	3250	124.824
Con07	3250	79.8978
Con08	3250	105.425
Con09	3250	115.299
Con10	3250	75.631
Con11	3250	92.8875
Con12	3250	73.5826
Con13	3250	145.734
Con14	3250	107.121
Con15	3250	99.0685
Con16	3250	109.741
Con17	3250	143.298
Con18	3250	117.255
Con19	3250	97.5
Con20	3250	76.9851
Con21	3250	102.334
Con22	3250	119.763
Con23	3250	91.9306
Con24	3250	55.7788
Con25	3250	100.527
Con26	3250	109.532
Con27	3250	100.183
Con28	3250	114.246
Con29	3250	99.7039
Con30	3250	78.1693
Con31	3250	119.751
Con32	3250	92.1162
Case01	3500	100.095
Case02	3500	80.8519
Case03	3500	92.176
Case04	3500	127.789
Case05	3500	65.5104
Case06	3500	65.6943
Case07	3500	74.0129
Case08	3500	113.074
Case09	3500	111.855
Case10	3500	124.252
Case11	3500	91.9345
Case12	3500	97.9732
Case13	3500	119.851
Case14	3500	116.207
Case15	3500	144.489
Case16	3500	102.396
Case17	3500	120.716
Case18	3500	144.043
Case19	3500	77.8677
Case20	3500	92.2442
Case21	3500	98.3714
Case22	3500	91.9731
Case23	3500	78.2449
Case24	3500	138.38
Case25	3500	93.09
Case26	3500	147.026
Case27	3500	116.874
Case28	3500	126.395
Case29	3500	96.8608
Case30	3500	62.0517
Case31	3500	144.179
Case32	3500	115.111
Case33	3500	138.524
Case34	3500	139.504
Case35	3500	117.129
Con01	3500	139.218
Con02	3500	159.148
Con03	3500	77.9369
Con04	3500	130.523
Con05	3500	82.7504
Con06	3500	127.452
Con07	3500	82.1772
Con08	3500	107.368
Con09	3500	117.875
Con10	3500	77.4176
Con11	3500	95.1515
Con12	3500	75.5887
Con13	3500	148.959
Con14	3500	110.175
Con15	3500	101.812
Con16	3500	112.223
Con17	3500	146.29
Con18	3500	120.492
Con19	3500	99.7317
Con20	3500	78.6366
Con21	3500	104.939
Con22	3500	122.163
Con23	3500	94.0649
Con24	3500	57.1984
Con25	3500	102.941
Con26	3500	112.329
Con27	3500	102.388
Con28	3500	116.421
Con29	3500	102.479
Con30	3500	79.8933
Con31	3500	122.176
Con32	3500	94.5123
Case01	3750	102.061
Case02	3750	82.3902
Case03	3750	93.9164
Case04	3750	130.328
Case05	3750	67.2132
Case06	3750	67.4478
Case07	3750	75.5871
Case08	3750	115.427
Case09	3750	114.947
Case10	3750	127.48
Case11	3750	94.7148
Case12	3750	100.492
Case13	3750	122.594
Case14	3750	118.717
Case15	3750	147.629
Case16	3750	104.478
Case17	3750	123.772
Case18	3750	147.435
Case19	3750	80.4184
Case20	3750	95.0123
Case21	3750	100.157
Case22	3750	94.3435
Case23	3750	80.0622
Case24	3750	141.267
Case25	3750	95.2808
Case26	3750	149.988
Case27	3750	119.522
Case28	3750	129.304
Case29	3750	99.0975
Case30	3750	63.7891
Case31	3750	147.261
Case32	3750	118.009
Case33	3750	141.643
Case34	3750	143.247
Case35	3750	119.679
Con01	3750	142.469
Con02	3750	162.929
Con03	3750	79.5585
Con04	3750	132.912
Con05	3750	84.838
Con06	3750	129.74
Con07	3750	84.3033
Con08	3750	108.913
Con09	3750	120.052
Con10	3750	78.8834
Con11	3750	96.9756
Con12	3750	77.4497
Con13	3750	151.713
Con14	3750	112.917
Con15	3750	104.442
Con16	3750	114.469
Con17	3750	149.484
Con18	3750	124.092
Con19	3750	101.667
Con20	3750	80.2347
Con21	3750	107.134
Con22	3750	124.543
Con23	3750	95.7583
Con24	3750	58.2532
Con25	3750	104.719
Con26	3750	114.642
Con27	3750	104.481
Con28	3750	117.915
Con29	3750	104.722
Con30	3750	81.6871
Con31	3750	124.197
Con32	3750	96.3979
Case01	4000	104.213
Case02	4000	83.7899
Case03	4000	95.6674
Case04	4000	132.698
Case05	4000	68.8792
Case06	4000	68.961
Case07	4000	77.4036
Case08	4000	117.996
Case09	4000	117.863
Case10	4000	130.643
Case11	4000	97.0497
Case12	4000	103.132
Case13	4000	125.308
Case14	4000	121.811
Case15	4000	150.809
Case16	4000	106.837
Case17	4000	126.445
Case18	4000	150.714
Case19	4000	82.7187
Case20	4000	97.4386
Case21	4000	102.108
Case22	4000	96.7916
Case23	4000	81.9393
Case24	4000	144
Case25	4000	97.3152
Case26	4000	152.6
Case27	4000	121.879
Case28	4000	131.923
Case29	4000	101.166
Case30	4000	65.47
Case31	4000	150.03
Case32	4000	120.562
Case33	4000	144.4
Case34	4000	147.048
Case35	4000	122.117
Con01	4000	145.7
Con02	4000	166.055
Con03	4000	81.2309
Con04	4000	135.174
Con05	4000	87.0091
Con06	4000	132.376
Con07	4000	85.9817
Con08	4000	111.056
Con09	4000	122.356
Con10	4000	80.4638
Con11	4000	98.7426
Con12	4000	79.3418
Con13	4000	154.236
Con14	4000	115.612
Con15	4000	106.741
Con16	4000	116.666
Con17	4000	152.266
Con18	4000	127.335
Con19	4000	103.739
Con20	4000	81.3036
Con21	4000	109.655
Con22	4000	126.144
Con23	4000	97.6124
Con24	4000	59.7434
Con25	4000	106.553
Con26	4000	116.795
Con27	4000	106.361
Con28	4000	120.218
Con29	4000	106.936
Con30	4000	83.2974
Con31	4000	126.547
Con32	4000	98.7419
Case01	4250	106.023
Case02	4250	85.2183
Case03	4250	97.3422
Case04	4250	135.053
Case05	4250	70.1203
Case06	4250	70.9305
Case07	4250	79.136
Case08	4250	120.149
Case09	4250	120.662
Case10	4250	133.664
Case11	4250	99.3568
Case12	4250	105.422
Case13	4250	127.901
Case14	4250	124.506
Case15	4250	153.343
Case16	4250	108.78
Case17	4250	128.855
Case18	4250	153.761
Case19	4250	84.81
Case20	4250	100.466
Case21	4250	104.181
Case22	4250	99.2807
Case23	4250	83.4016
Case24	4250	146.351
Case25	4250	99.3462
Case26	4250	154.885
Case27	4250	124.23
Case28	4250	134.119
Case29	4250	102.843
Case30	4250	67.5797
Case31	4250	152.816
Case32	4250	123.151
Case33	4250	146.759
Case34	4250	150.387
Case35	4250	124.25
Con01	4250	148.145
Con02	4250	169.574
Con03	4250	82.875
Con04	4250	137.331
Con05	4250	88.8932
Con06	4250	134.713
Con07	4250	87.6803
Con08	4250	112.554
Con09	4250	124.671
Con10	4250	81.8542
Con11	4250	100.282
Con12	4250	80.8524
Con13	4250	157.159
Con14	4250	118.185
Con15	4250	109.235
Con16	4250	118.929
Con17	4250	154.604
Con18	4250	130.14
Con19	4250	105.637
Con20	4250	82.9736
Con21	4250	111.454
Con22	4250	127.633
Con23	4250	99.5366
Con24	4250	61.2415
Con25	4250	108.178
Con26	4250	119.061
Con27	4250	108.041
Con28	4250	122.113
Con29	4250	108.902
Con30	4250	85.1681
Con31	4250	128.344
Con32	4250	100.94
Case01	4500	107.859
Case02	4500	86.898
Case03	4500	99.0895
Case04	4500	137.484
Case05	4500	71.5625
Case06	4500	72.4811
Case07	4500	80.8342
Case08	4500	122.311
Case09	4500	123.261
Case10	4500	136.648
Case11	4500	101.59
Case12	4500	107.659
Case13	4500	130.014
Case14	4500	126.752
Case15	4500	155.841
Case16	4500	111.417
Case17	4500	131.191
Case18	4500	156.535
Case19	4500	87.1822
Case20	4500	102.856
Case21	4500	105.793
Case22	4500	101.83
Case23	4500	85.0673
Case24	4500	149.227
Case25	4500	101.077
Case26	4500	157.047
Case27	4500	126.353
Case28	4500	136.309
Case29	4500	104.585
Case30	4500	69.5717
Case31	4500	155.384
Case32	4500	125.587
Case33	4500	149.257
Case34	4500	153.356
Case35	4500	126.314
Con01	4500	151.083
Con02	4500	172.748
Con03	4500	84.443
Con04	4500	139.666
Con05	4500	90.8436
Con06	4500	137.156
Con07	4500	89.3706
Con08	4500	114.242
Con09	4500	126.692
Con10	4500	83.1934
Con11	4500	101.972
Con12	4500	82.5744
Con13	4500	159.638
Con14	4500	120.678
Con15	4500	111.79
Con16	4500	120.854
Con17	4500	157.213
Con18	4500	132.643
Con19	4500	107.499
Con20	4500	84.7806
Con21	4500	113.13
Con22	4500	129.349
Con23	4500	100.997
Con24	4500	62.3058
Con25	4500	110.049
Con26	4500	120.867
Con27	4500	110.196
Con28	4500	123.734
Con29	4500	110.919
Con30	4500	86.7359
Con31	4500	130.258
Con32	4500	102.393
Case01	4750	109.644
Case02	4750	88.4019
Case03	4750	100.431
Case04	4750	139.414
Case05	4750	72.8432
Case06	4750	74.1254
Case07	4750	82.5472
Case08	4750	124.185
Case09	4750	125.965
Case10	4750	139.838
Case11	4750	103.452
Case12	4750	109.531
Case13	4750	132.546
Case14	4750	129.41
Case15	4750	158.498
Case16	4750	113.611
Case17	4750	133.176
Case18	4750	159.338
Case19	4750	89.158
Case20	4750	104.985
Case21	4750	107.601
Case22	4750	104.008
Case23	4750	86.8299
Case24	4750	151.507
Case25	4750	103.227
Case26	4750	159.133
Case27	4750	128.454
Case28	4750	138.927
Case29	4750	106.031
Case30	4750	71.3291
Case31	4750	157.955
Case32	4750	127.696
Case33	4750	152.324
Case34	4750	156.157
Case35	4750	128.164
Con01	4750	153.919
Con02	4750	175.392
Con03	4750	85.8166
Con04	4750	141.477
Con05	4750	92.4157
Con06	4750	139.209
Con07	4750	91.1117
Con08	4750	115.81
Con09	4750	128.625
Con10	4750	84.5859
Con11	4750	103.574
Con12	4750	84.1573
Con13	4750	161.895
Con14	4750	122.691
Con15	4750	113.982
Con16	4750	122.487
Con17	4750	159.617
Con18	4750	135.417
Con19	4750	109.24
Con20	4750	86.0795
Con21	4750	115.013
Con22	4750	131.013
Con23	4750	102.654
Con24	4750	63.4662
Con25	4750	111.539
Con26	4750	122.583
Con27	4750	111.812
Con28	4750	125.3
Con29	4750	112.609
Con30	4750	88.1641
Con31	4750	131.631
Con32	4750	104.016
Case01	5000	111.225
Case02	5000	90.0345
Case03	5000	101.571
Case04	5000	141.586
Case05	5000	74.0514
Case06	5000	75.61
Case07	5000	83.9437
Case08	5000	126.249
Case09	5000	128.11
Case10	5000	142.422
Case11	5000	105.342
Case12	5000	111.375
Case13	5000	134.855
Case14	5000	131.642
Case15	5000	160.837
Case16	5000	115.522
Case17	5000	135.455
Case18	5000	161.781
Case19	5000	91.157
Case20	5000	107.86
Case21	5000	109.205
Case22	5000	105.866
Case23	5000	88.323
Case24	5000	153.834
Case25	5000	105.143
Case26	5000	160.793
Case27	5000	130.362
Case28	5000	141.664
Case29	5000	107.993
Case30	5000	73.0617
Case31	5000	160.299
Case32	5000	129.94
Case33	5000	154.732
Case34	5000	159.186
Case35	5000	130.012
Con01	5000	156.485
Con02	5000	178.173
Con03	5000	87.3894
Con04	5000	143.22
Con05	5000	94.1711
Con06	5000	141.232
Con07	5000	92.5977
Con08	5000	117.287
Con09	5000	130.353
Con10	5000	85.9055
Con11	5000	104.793
Con12	5000	85.8958
Con13	5000	164.549
Con14	5000	124.49
Con15	5000	115.859
Con16	5000	124.071
Con17	5000	162.089
Con18	5000	138.052
Con19	5000	110.921
Con20	5000	87.2867
Con21	5000	116.971
Con22	5000	132.743
Con23	5000	104.096
Con24	5000	64.6462
Con25	5000	113.088
Con26	5000	124.063
Con27	5000	113.379
Con28	5000	126.718
Con29	5000	114.391
Con30	5000	89.1945
Con31	5000	133.27
Con32	5000	105.454
Case01	5250	112.938
Case02	5250	91.5066
Case03	5250	103.077
Case04	5250	143.688
Case05	5250	75.0829
Case06	5250	76.8656
Case07	5250	85.4407
Case08	5250	128.05
Case09	5250	130.423
Case10	5250	145.363
Case11	5250	107.391
Case12	5250	112.952
Case13	5250	137.19
Case14	5250	133.723
Case15	5250	162.799
Case16	5250	117.398
Case17	5250	137.376
Case18	5250	164.274
Case19	5250	92.8838
Case20	5250	110.091
Case21	5250	110.741
Case22	5250	107.891
Case23	5250	90.0388
Case24	5250	155.636
Case25	5250	106.699
Case26	5250	162.728
Case27	5250	131.906
Case28	5250	143.901
Case29	5250	109.7
Case30	5250	74.5955
Case31	5250	162.378
Case32	5250	131.971
Case33	5250	157.317
Case34	5250	161.987
Case35	5250	131.263
Con01	5250	158.853
Con02	5250	180.415
Con03	5250	88.6864
Con04	5250	145.143
Con05	5250	95.7508
Con06	5250	143.312
Con07	5250	93.7784
Con08	5250	118.687
Con09	5250	132.139
Con10	5250	87.1726
Con11	5250	106.214
Con12	5250	87.1026
Con13	5250	166.738
Con14	5250	126.705
Con15	5250	117.82
Con16	5250	125.905
Con17	5250	164.078
Con18	5250	140.249
Con19	5250	112.236
Con20	5250	88.4259
Con21	5250	118.652
Con22	5250	134.24
Con23	5250	105.585
Con24	5250	65.9001
Con25	5250	114.804
Con26	5250	125.652
Con27	5250	114.67
Con28	5250	128.036
Con29	5250	116.216
Con30	5250	90.3619
Con31	5250	134.63
Con32	5250	106.921
Case01	5500	114.697
Case02	5500	92.6594
Case03	5500	104.552
Case04	5500	145.568
Case05	5500	76.6399
Case06	5500	78.2917
Case07	5500	86.9392
Case08	5500	129.814
Case09	5500	132.414
Case10	5500	147.873
Case11	5500	109.615
Case12	5500	114.643
Case13	5500	138.954
Case14	5500	135.698
Case15	5500	164.578
Case16	5500	119.435
Case17	5500	139.312
Case18	5500	166.433
Case19	5500	94.661
Case20	5500	112.247
Case21	5500	112.35
Case22	5500	109.51
Case23	5500	91.3675
Case24	5500	157.791
Case25	5500	108.444
Case26	5500	164.251
Case27	5500	133.773
Case28	5500	145.951
Case29	5500	110.94
Case30	5500	76.1376
Case31	5500	164.308
Case32	5500	133.93
Case33	5500	159.629
Case34	5500	164.791
Case35	5500	132.987
Con01	5500	160.778
Con02	5500	182.756
Con03	5500	90.4034
Con04	5500	146.64
Con05	5500	97.3621
Con06	5500	145.121
Con07	5500	95.129
Con08	5500	119.689
Con09	5500	133.912
Con10	5500	88.4522
Con11	5500	107.723
Con12	5500	88.5792
Con13	5500	169
Con14	5500	128.435
Con15	5500	119.782
Con16	5500	127.661
Con17	5500	165.842
Con18	5500	142.314
Con19	5500	113.633
Con20	5500	89.5462
Con21	5500	120.149
Con22	5500	135.794
Con23	5500	107.021
Con24	5500	66.8025
Con25	5500	116.401
Con26	5500	127.314
Con27	5500	115.943
Con28	5500	129.522
Con29	5500	117.765
Con30	5500	91.4168
Con31	5500	136.016
Con32	5500	108.354
Case01	5750	116.021
Case02	5750	94.1605
Case03	5750	105.921
Case04	5750	147.153
Case05	5750	77.8138
Case06	5750	79.7079
Case07	5750	88.3878
Case08	5750	131.376
Case09	5750	134.566
Case10	5750	150.285
Case11	5750	111.397
Case12	5750	116.493
Case13	5750	140.797
Case14	5750	138.073
Case15	5750	166.691
Case16	5750	121.217
Case17	5750	141.327
Case18	5750	168.612
Case19	5750	96.4449
Case20	5750	114.741
Case21	5750	113.955
Case22	5750	111.199
Case23	5750	92.8834
Case24	5750	159.864
Case25	5750	110.183
Case26	5750	165.963
Case27	5750	135.656
Case28	5750	147.742
Case29	5750	112.311
Case30	5750	77.8332
Case31	5750	166.52
Case32	5750	135.7
Case33	5750	161.459
Case34	5750	167.101
Case35	5750	134.608
Con01	5750	162.952
Con02	5750	184.756
Con03	5750	91.5392
Con04	5750	148.023
Con05	5750	98.9242
Con06	5750	147.118
Con07	5750	96.5919
Con08	5750	121.257
Con09	5750	135.574
Con10	5750	89.5356
Con11	5750	109.198
Con12	5750	89.8707
Con13	5750	171.104
Con14	5750	130.273
Con15	5750	121.354
Con16	5750	129.3
Con17	5750	167.73
Con18	5750	144.5
Con19	5750	115.317
Con20	5750	90.6249
Con21	5750	121.404
Con22	5750	137.108
Con23	5750	108.412
Con24	5750	67.746
Con25	5750	117.835
Con26	5750	128.783
Con27	5750	117.211
Con28	5750	130.855
Con29	5750	119.359
Con30	5750	92.5818
Con31	5750	137.4
Con32	5750	109.877
Case01	6000	117.61
Case02	6000	95.4944
Case03	6000	107.344
Case04	6000	148.577
Case05	6000	78.9899
Case06	6000	80.9165
Case07	6000	89.9573
Case08	6000	132.955
Case09	6000	136.875
Case10	6000	152.121
Case11	6000	112.867
Case12	6000	118.42
Case13	6000	142.436
Case14	6000	140.032
Case15	6000	168.741
Case16	6000	122.564
Case17	6000	143.157
Case18	6000	170.727
Case19	6000	97.7793
Case20	6000	116.964
Case21	6000	115.676
Case22	6000	112.944
Case23	6000	94.3625
Case24	6000	161.544
Case25	6000	111.844
Case26	6000	167.771
Case27	6000	137.412
Case28	6000	149.624
Case29	6000	113.937
Case30	6000	79.4555
Case31	6000	168.11
Case32	6000	137.699
Case33	6000	163.253
Case34	6000	169.573
Case35	6000	136.028
Con01	6000	165.187
Con02	6000	186.763
Con03	6000	92.8017
Con04	6000	149.539
Con05	6000	100.569
Con06	6000	148.648
Con07	6000	97.954
Con08	6000	122.291
Con09	6000	137.222
Con10	6000	91.0382
Con11	6000	110.314
Con12	6000	91.2341
Con13	6000	173.077
Con14	6000	132.432
Con15	6000	122.675
Con16	6000	130.663
Con17	6000	169.426
Con18	6000	146.747
Con19	6000	117.035
Con20	6000	91.7054
Con21	6000	122.867
Con22	6000	138.267
Con23	6000	109.621
Con24	6000	69.0802
Con25	6000	118.854
Con26	6000	130.158
Con27	6000	118.591
Con28	6000	132.143
Con29	6000	121.245
Con30	6000	93.6362
Con31	6000	138.479
Con32	6000	111.274
Case01	6250	118.737
Case02	6250	96.83
Case03	6250	108.672
Case04	6250	150.306
Case05	6250	79.9669
Case06	6250	82.2523
Case07	6250	91.1766
Case08	6250	134.519
Case09	6250	138.541
Case10	6250	154.306
Case11	6250	114.57
Case12	6250	120.273
Case13	6250	143.846
Case14	6250	141.857
Case15	6250	170.523
Case16	6250	124.007
Case17	6250	144.891
Case18	6250	173.032
Case19	6250	99.1715
Case20	6250	118.733
Case21	6250	117.122
Case22	6250	115.029
Case23	6250	95.6471
Case24	6250	163.481
Case25	6250	113.176
Case26	6250	169.508
Case27	6250	139.488
Case28	6250	151.761
Case29	6250	115.485
Case30	6250	80.917
Case31	6250	170.126
Case32	6250	139.575
Case33	6250	165.204
Case34	6250	171.701
Case35	6250	137.638
Con01	6250	167.355
Con02	6250	188.764
Con03	6250	94.1934
Con04	6250	151.036
Con05	6250	101.894
Con06	6250	150.458
Con07	6250	99.4054
Con08	6250	123.414
Con09	6250	138.62
Con10	6250	92.1589
Con11	6250	111.299
Con12	6250	92.6348
Con13	6250	174.717
Con14	6250	133.706
Con15	6250	124.214
Con16	6250	132.053
Con17	6250	171.066
Con18	6250	148.846
Con19	6250	118.194
Con20	6250	92.7965
Con21	6250	124.456
Con22	6250	140.082
Con23	6250	110.945
Con24	6250	70.085
Con25	6250	119.767
Con26	6250	131.664
Con27	6250	120.043
Con28	6250	133.43
Con29	6250	122.846
Con30	6250	94.764
Con31	6250	139.893
Con32	6250	112.627
Case01	6500	120.101
Case02	6500	97.845
Case03	6500	109.652
Case04	6500	151.806
Case05	6500	81.0974
Case06	6500	83.7319
Case07	6500	92.5448
Case08	6500	136.265
Case09	6500	140.691
Case10	6500	156.13
Case11	6500	116.319
Case12	6500	121.828
Case13	6500	145.274
Case14	6500	143.315
Case15	6500	172.604
Case16	6500	125.308
Case17	6500	146.436
Case18	6500	175.273
Case19	6500	100.602
Case20	6500	120.606
Case21	6500	118.422
Case22	6500	116.871
Case23	6500	96.869
Case24	6500	165.333
Case25	6500	114.44
Case26	6500	170.986
Case27	6500	141.049
Case28	6500	153.7
Case29	6500	116.741
Case30	6500	82.3842
Case31	6500	171.966
Case32	6500	141.167
Case33	6500	167.011
Case34	6500	173.598
Case35	6500	139.463
Con01	6500	169.545
Con02	6500	191.104
Con03	6500	95.3907
Con04	6500	152.296
Con05	6500	103.496
Con06	6500	152.012
Con07	6500	100.676
Con08	6500	124.675
Con09	6500	139.941
Con10	6500	93.4614
Con11	6500	112.67
Con12	6500	93.9723
Con13	6500	176.209
Con14	6500	135.396
Con15	6500	125.453
Con16	6500	133.411
Con17	6500	172.879
Con18	6500	150.825
Con19	6500	119.451
Con20	6500	94.0091
Con21	6500	125.901
Con22	6500	141.77
Con23	6500	111.739
Con24	6500	70.9397
Con25	6500	120.691
Con26	6500	133.117
Con27	6500	121.125
Con28	6500	134.727
Con29	6500	124.434
Con30	6500	95.6717
Con31	6500	141.008
Con32	6500	113.777
Case01	6750	121.526
Case02	6750	99.2209
Case03	6750	110.856
Case04	6750	153.05
Case05	6750	82.1697
Case06	6750	85.0939
Case07	6750	94.0662
Case08	6750	137.662
Case09	6750	142.674
Case10	6750	158.422
Case11	6750	118.158
Case12	6750	123.298
Case13	6750	147.039
Case14	6750	144.728
Case15	6750	174.425
Case16	6750	126.898
Case17	6750	148.235
Case18	6750	177.224
Case19	6750	102.009
Case20	6750	122.549
Case21	6750	119.845
Case22	6750	118.462
Case23	6750	98.0631
Case24	6750	167.083
Case25	6750	115.702
Case26	6750	172.451
Case27	6750	142.784
Case28	6750	155.542
Case29	6750	118.056
Case30	6750	83.9174
Case31	6750	173.317
Case32	6750	142.644
Case33	6750	168.801
Case34	6750	175.693
Case35	6750	140.936
Con01	6750	171.527
Con02	6750	193.243
Con03	6750	96.7717
Con04	6750	153.569
Con05	6750	104.987
Con06	6750	153.975
Con07	6750	101.813
Con08	6750	125.742
Con09	6750	141.197
Con10	6750	94.466
Con11	6750	113.902
Con12	6750	94.7764
Con13	6750	178.179
Con14	6750	137.179
Con15	6750	126.974
Con16	6750	134.833
Con17	6750	174.51
Con18	6750	152.609
Con19	6750	120.702
Con20	6750	94.931
Con21	6750	126.964
Con22	6750	142.664
Con23	6750	112.8
Con24	6750	71.7795
Con25	6750	121.798
Con26	6750	134.672
Con27	6750	122.225
Con28	6750	135.716
Con29	6750	125.846
Con30	6750	96.74
Con31	6750	141.928
Con32	6750	114.921
Case01	7000	123.058
Case02	7000	100.586
Case03	7000	112.109
Case04	7000	154.671
Case05	7000	83.1792
Case06	7000	86.4162
Case07	7000	95.3575
Case08	7000	139.161
Case09	7000	144.792
Case10	7000	160.451
Case11	7000	119.721
Case12	7000	124.884
Case13	7000	148.553
Case14	7000	146.351
Case15	7000	176.004
Case16	7000	128.603
Case17	7000	149.567
Case18	7000	179.164
Case19	7000	103.529
Case20	7000	124.472
Case21	7000	121.429
Case22	7000	120.29
Case23	7000	99.1663
Case24	7000	168.594
Case25	7000	117.001
Case26	7000	173.878
Case27	7000	144.416
Case28	7000	157.243
Case29	7000	119.151
Case30	7000	85.4791
Case31	7000	174.908
Case32	7000	143.914
Case33	7000	170.254
Case34	7000	177.846
Case35	7000	142.418
Con01	7000	172.996
Con02	7000	195.299
Con03	7000	97.9491
Con04	7000	154.987
Con05	7000	106.469
Con06	7000	155.5
Con07	7000	102.701
Con08	7000	126.896
Con09	7000	142.24
Con10	7000	95.9035
Con11	7000	114.927
Con12	7000	96.1914
Con13	7000	179.97
Con14	7000	139.036
Con15	7000	128.517
Con16	7000	136.21
Con17	7000	175.61
Con18	7000	154.472
Con19	7000	122.046
Con20	7000	95.8838
Con21	7000	128.079
Con22	7000	143.871
Con23	7000	113.571
Con24	7000	72.5365
Con25	7000	122.846
Con26	7000	135.929
Con27	7000	123.498
Con28	7000	136.845
Con29	7000	126.987
Con30	7000	97.5752
Con31	7000	142.914
Con32	7000	116.211
Case01	7250	124.624
Case02	7250	101.433
Case03	7250	113.091
Case04	7250	156.125
Case05	7250	84.3243
Case06	7250	87.7891
Case07	7250	96.7211
Case08	7250	140.38
Case09	7250	146.238
Case10	7250	162.469
Case11	7250	121.116
Case12	7250	126.367
Case13	7250	150.016
Case14	7250	147.878
Case15	7250	177.65
Case16	7250	130.292
Case17	7250	150.924
Case18	7250	181.07
Case19	7250	104.748
Case20	7250	125.994
Case21	7250	122.72
Case22	7250	121.681
Case23	7250	100.391
Case24	7250	170.132
Case25	7250	118.274
Case26	7250	175.444
Case27	7250	145.972
Case28	7250	159.052
Case29	7250	120.547
Case30	7250	86.6896
Case31	7250	176.584
Case32	7250	145.42
Case33	7250	172.004
Case34	7250	179.952
Case35	7250	143.768
Con01	7250	174.581
Con02	7250	197.325
Con03	7250	99.0548
Con04	7250	156.265
Con05	7250	107.822
Con06	7250	156.865
Con07	7250	103.669
Con08	7250	128.185
Con09	7250	143.376
Con10	7250	97.2018
Con11	7250	115.976
Con12	7250	97.1419
Con13	7250	181.536
Con14	7250	140.454
Con15	7250	130.148
Con16	7250	137.469
Con17	7250	177.159
Con18	7250	156.1
Con19	7250	123.697
Con20	7250	96.6609
Con21	7250	129.252
[truncated: 16,195 more rows]
