# Supplementary material for: Characterization of gut microbiota in adults with coronary atherosclerosis
Source: PeerJ journal article supplement (doi:10.7717/peerj.15245), 2023-05-18
Supplement: Raw_Data.zip [file Figure1B_shannon_curve_data.xls]

sample	numsampled	Value
Case01	0	0
Case02	0	0
Case03	0	0
Case04	0	0
Case05	0	0
Case06	0	0
Case07	0	0
Case08	0	0
Case09	0	0
Case10	0	0
Case11	0	0
Case12	0	0
Case13	0	0
Case14	0	0
Case15	0	0
Case16	0	0
Case17	0	0
Case18	0	0
Case19	0	0
Case20	0	0
Case21	0	0
Case22	0	0
Case23	0	0
Case24	0	0
Case25	0	0
Case26	0	0
Case27	0	0
Case28	0	0
Case29	0	0
Case30	0	0
Case31	0	0
Case32	0	0
Case33	0	0
Case34	0	0
Case35	0	0
Con01	0	0
Con02	0	0
Con03	0	0
Con04	0	0
Con05	0	0
Con06	0	0
Con07	0	0
Con08	0	0
Con09	0	0
Con10	0	0
Con11	0	0
Con12	0	0
Con13	0	0
Con14	0	0
Con15	0	0
Con16	0	0
Con17	0	0
Con18	0	0
Con19	0	0
Con20	0	0
Con21	0	0
Con22	0	0
Con23	0	0
Con24	0	0
Con25	0	0
Con26	0	0
Con27	0	0
Con28	0	0
Con29	0	0
Con30	0	0
Con31	0	0
Con32	0	0
Case01	250	3.79891
Case02	250	4.03118
Case03	250	4.34093
Case04	250	4.26461
Case05	250	3.43015
Case06	250	3.57615
Case07	250	3.65204
Case08	250	3.80323
Case09	250	3.76111
Case10	250	4.12092
Case11	250	4.03551
Case12	250	4.03969
Case13	250	4.26591
Case14	250	4.13231
Case15	250	4.34352
Case16	250	4.16593
Case17	250	4.20243
Case18	250	3.97968
Case19	250	3.28213
Case20	250	3.14493
Case21	250	4.18411
Case22	250	2.78238
Case23	250	3.78722
Case24	250	4.7104
Case25	250	4.20171
Case26	250	4.99288
Case27	250	4.35622
Case28	250	4.34886
Case29	250	3.7513
Case30	250	1.26885
Case31	250	4.63264
Case32	250	4.28567
Case33	250	3.97419
Case34	250	3.56288
Case35	250	4.12957
Con01	250	4.41018
Con02	250	3.80525
Con03	250	3.39942
Con04	250	4.80288
Con05	250	4.30385
Con06	250	4.43124
Con07	250	3.77048
Con08	250	4.60047
Con09	250	3.83858
Con10	250	4.09105
Con11	250	4.03349
Con12	250	3.98213
Con13	250	4.23157
Con14	250	2.94988
Con15	250	4.51852
Con16	250	4.19709
Con17	250	4.71285
Con18	250	3.51397
Con19	250	4.09812
Con20	250	3.83007
Con21	250	4.04892
Con22	250	4.51044
Con23	250	3.80872
Con24	250	2.80258
Con25	250	4.10086
Con26	250	4.47827
Con27	250	3.47733
Con28	250	4.63899
Con29	250	3.76327
Con30	250	3.8595
Con31	250	4.6335
Con32	250	2.70376
Case01	500	3.95616
Case02	500	4.18079
Case03	500	4.48245
Case04	500	4.48029
Case05	500	3.55812
Case06	500	3.67656
Case07	500	3.79631
Case08	500	3.99439
Case09	500	3.94736
Case10	500	4.30875
Case11	500	4.16362
Case12	500	4.20993
Case13	500	4.44538
Case14	500	4.29793
Case15	500	4.53684
Case16	500	4.32679
Case17	500	4.38926
Case18	500	4.22551
Case19	500	3.43174
Case20	500	3.27622
Case21	500	4.34367
Case22	500	2.96892
Case23	500	3.9426
Case24	500	4.90762
Case25	500	4.35752
Case26	500	5.20539
Case27	500	4.53194
Case28	500	4.55791
Case29	500	3.896
Case30	500	1.38571
Case31	500	4.84197
Case32	500	4.4598
Case33	500	4.15063
Case34	500	3.76269
Case35	500	4.29779
Con01	500	4.61951
Con02	500	4.027
Con03	500	3.5499
Con04	500	5.01625
Con05	500	4.45447
Con06	500	4.63163
Con07	500	3.90523
Con08	500	4.77143
Con09	500	4.03291
Con10	500	4.23835
Con11	500	4.20243
Con12	500	4.11861
Con13	500	4.46586
Con14	500	3.1419
Con15	500	4.67015
Con16	500	4.3845
Con17	500	4.92132
Con18	500	3.71581
Con19	500	4.275
Con20	500	4.00968
Con21	500	4.2372
Con22	500	4.70045
Con23	500	3.98674
Con24	500	2.93992
Con25	500	4.27211
Con26	500	4.66322
Con27	500	3.63155
Con28	500	4.84226
Con29	500	3.93192
Con30	500	4.00896
Con31	500	4.83923
Con32	500	2.90025
Case01	750	4.02656
Case02	750	4.23994
Case03	750	4.54536
Case04	750	4.57753
Case05	750	3.61626
Case06	750	3.72807
Case07	750	3.85099
Case08	750	4.07013
Case09	750	4.01964
Case10	750	4.39041
Case11	750	4.23143
Case12	750	4.27918
Case13	750	4.52516
Case14	750	4.36704
Case15	750	4.62889
Case16	750	4.40484
Case17	750	4.45908
Case18	750	4.30976
Case19	750	3.48901
Case20	750	3.36595
Case21	750	4.41032
Case22	750	3.04856
Case23	750	4.00204
Case24	750	4.99995
Case25	750	4.43542
Case26	750	5.30046
Case27	750	4.61908
Case28	750	4.64317
Case29	750	3.9778
Case30	750	1.44717
Case31	750	4.93445
Case32	750	4.5429
Case33	750	4.25393
Case34	750	3.85156
Case35	750	4.38695
Con01	750	4.70867
Con02	750	4.12755
Con03	750	3.61121
Con04	750	5.09271
Con05	750	4.51867
Con06	750	4.71848
Con07	750	3.96986
Con08	750	4.83462
Con09	750	4.11673
Con10	750	4.29591
Con11	750	4.25696
Con12	750	4.18079
Con13	750	4.56772
Con14	750	3.22688
Con15	750	4.73262
Con16	750	4.46687
Con17	750	5.00529
Con18	750	3.80727
Con19	750	4.34381
Con20	750	4.08615
Con21	750	4.31799
Con22	750	4.78355
Con23	750	4.05542
Con24	750	3.00499
Con25	750	4.33342
Con26	750	4.73839
Con27	750	3.71234
Con28	750	4.91829
Con29	750	4.00651
Con30	750	4.07691
Con31	750	4.92479
Con32	750	2.96806
Case01	1000	4.07864
Case02	1000	4.27456
Case03	1000	4.57897
Case04	1000	4.62846
Case05	1000	3.64699
Case06	1000	3.76544
Case07	1000	3.8833
Case08	1000	4.12683
Case09	1000	4.06234
Case10	1000	4.43066
Case11	1000	4.2737
Case12	1000	4.3265
Case13	1000	4.56094
Case14	1000	4.41234
Case15	1000	4.68328
Case16	1000	4.4523
Case17	1000	4.50857
Case18	1000	4.36127
Case19	1000	3.517
Case20	1000	3.41616
Case21	1000	4.44725
Case22	1000	3.09126
Case23	1000	4.04315
Case24	1000	5.04886
Case25	1000	4.46933
Case26	1000	5.3537
Case27	1000	4.66597
Case28	1000	4.69309
Case29	1000	4.01271
Case30	1000	1.48684
Case31	1000	4.99158
Case32	1000	4.58575
Case33	1000	4.30919
Case34	1000	3.90119
Case35	1000	4.44076
Con01	1000	4.76017
Con02	1000	4.18988
Con03	1000	3.65622
Con04	1000	5.13975
Con05	1000	4.55863
Con06	1000	4.7632
Con07	1000	4.01185
Con08	1000	4.87674
Con09	1000	4.16824
Con10	1000	4.33559
Con11	1000	4.29678
Con12	1000	4.217
Con13	1000	4.62312
Con14	1000	3.27636
Con15	1000	4.77359
Con16	1000	4.51895
Con17	1000	5.0552
Con18	1000	3.85041
Con19	1000	4.38046
Con20	1000	4.12539
Con21	1000	4.35521
Con22	1000	4.82394
Con23	1000	4.09004
Con24	1000	3.03716
Con25	1000	4.36487
Con26	1000	4.78181
Con27	1000	3.77265
Con28	1000	4.96316
Con29	1000	4.05787
Con30	1000	4.11673
Con31	1000	4.96388
Con32	1000	3.01754
Case01	1250	4.10822
Case02	1250	4.30255
Case03	1250	4.60537
Case04	1250	4.66207
Case05	1250	3.67195
Case06	1250	3.78708
Case07	1250	3.91071
Case08	1250	4.16376
Case09	1250	4.0935
Case10	1250	4.4611
Case11	1250	4.29851
Case12	1250	4.35117
Case13	1250	4.59311
Case14	1250	4.44278
Case15	1250	4.72483
Case16	1250	4.47524
Case17	1250	4.5429
Case18	1250	4.40772
Case19	1250	3.54312
Case20	1250	3.44141
Case21	1250	4.47654
Case22	1250	3.12243
Case23	1250	4.06451
Case24	1250	5.08334
Case25	1250	4.49746
Case26	1250	5.38789
Case27	1250	4.69468
Case28	1250	4.72064
Case29	1250	4.03507
Case30	1250	1.50387
Case31	1250	5.02534
Case32	1250	4.61143
Case33	1250	4.34251
Case34	1250	3.94202
Case35	1250	4.46413
Con01	1250	4.79465
Con02	1250	4.22825
Con03	1250	3.67959
Con04	1250	5.17856
Con05	1250	4.58662
Con06	1250	4.78989
Con07	1250	4.03695
Con08	1250	4.90675
Con09	1250	4.20834
Con10	1250	4.36069
Con11	1250	4.32159
Con12	1250	4.2408
Con13	1250	4.66669
Con14	1250	3.30219
Con15	1250	4.80086
Con16	1250	4.54218
Con17	1250	5.08579
Con18	1250	3.88547
Con19	1250	4.40888
Con20	1250	4.14833
Con21	1250	4.37959
Con22	1250	4.85784
Con23	1250	4.12048
Con24	1250	3.05794
Con25	1250	4.40715
Con26	1250	4.80807
Con27	1250	3.81766
Con28	1250	4.99245
Con29	1250	4.07951
Con30	1250	4.13693
Con31	1250	4.99706
Con32	1250	3.03745
Case01	1500	4.12885
Case02	1500	4.33039
Case03	1500	4.62225
Case04	1500	4.68025
Case05	1500	3.68897
Case06	1500	3.80525
Case07	1500	3.92832
Case08	1500	4.18829
Case09	1500	4.11832
Case10	1500	4.48404
Case11	1500	4.31669
Case12	1500	4.37108
Case13	1500	4.61994
Case14	1500	4.46731
Case15	1500	4.74878
Case16	1500	4.494
Case17	1500	4.56945
Case18	1500	4.43961
Case19	1500	3.55668
Case20	1500	3.46694
Case21	1500	4.49428
Case22	1500	3.14421
Case23	1500	4.08009
Case24	1500	5.10628
Case25	1500	4.51564
Case26	1500	5.41299
Case27	1500	4.71357
Case28	1500	4.74099
Case29	1500	4.05686
Case30	1500	1.51959
Case31	1500	5.049
Case32	1500	4.6348
Case33	1500	4.37209
Case34	1500	3.96323
Case35	1500	4.48621
Con01	1500	4.82033
Con02	1500	4.26115
Con03	1500	3.70268
Con04	1500	5.20164
Con05	1500	4.60321
Con06	1500	4.8124
Con07	1500	4.05484
Con08	1500	4.92421
Con09	1500	4.23676
Con10	1500	4.37512
Con11	1500	4.3428
Con12	1500	4.25884
Con13	1500	4.69453
Con14	1500	3.32989
Con15	1500	4.81673
Con16	1500	4.56613
Con17	1500	5.11046
Con18	1500	3.90725
Con19	1500	4.43182
Con20	1500	4.1629
Con21	1500	4.40628
Con22	1500	4.88453
Con23	1500	4.14039
Con24	1500	3.07381
Con25	1500	4.42403
Con26	1500	4.83043
Con27	1500	3.84305
Con28	1500	5.01423
Con29	1500	4.09754
Con30	1500	4.15179
Con31	1500	5.01827
Con32	1500	3.06429
Case01	1750	4.14789
Case02	1750	4.34525
Case03	1750	4.63783
Case04	1750	4.69468
Case05	1750	3.6972
Case06	1750	3.81824
Case07	1750	3.93668
Case08	1750	4.20906
Case09	1750	4.13664
Case10	1750	4.50309
Case11	1750	4.33328
Case12	1750	4.38594
Case13	1750	4.63264
Case14	1750	4.48433
Case15	1750	4.76508
Case16	1750	4.50886
Case17	1750	4.58734
Case18	1750	4.45894
Case19	1750	3.57918
Case20	1750	3.47935
Case21	1750	4.50525
Case22	1750	3.15416
Case23	1750	4.09552
Case24	1750	5.12647
Case25	1750	4.53107
Case26	1750	5.43059
Case27	1750	4.73204
Case28	1750	4.76219
Case29	1750	4.07475
Case30	1750	1.53387
Case31	1750	5.07079
Case32	1750	4.65183
Case33	1750	4.38695
Case34	1750	3.98285
Case35	1750	4.50756
Con01	1750	4.84313
Con02	1750	4.28639
Con03	1750	3.71234
Con04	1750	5.21794
Con05	1750	4.61807
Con06	1750	4.83303
Con07	1750	4.07013
Con08	1750	4.93662
Con09	1750	4.2561
Con10	1750	4.38709
Con11	1750	4.36185
Con12	1750	4.27153
Con13	1750	4.71199
Con14	1750	3.34532
Con15	1750	4.83216
Con16	1750	4.58517
Con17	1750	5.13008
Con18	1750	3.9286
Con19	1750	4.44494
Con20	1750	4.17588
Con21	1750	4.42446
Con22	1750	4.90112
Con23	1750	4.15136
Con24	1750	3.08737
Con25	1750	4.44191
Con26	1750	4.8502
Con27	1750	3.85733
Con28	1750	5.03342
Con29	1750	4.10981
Con30	1750	4.16636
Con31	1750	5.03833
Con32	1750	3.0741
Case01	2000	4.1603
Case02	2000	4.35809
Case03	2000	4.65139
Case04	2000	4.7091
Case05	2000	3.70701
Case06	2000	3.83021
Case07	2000	3.94678
Case08	2000	4.22335
Case09	2000	4.14703
Case10	2000	4.5152
Case11	2000	4.34222
Case12	2000	4.40239
Case13	2000	4.64865
Case14	2000	4.50006
Case15	2000	4.77734
Case16	2000	4.52372
Case17	2000	4.60119
Case18	2000	4.4738
Case19	2000	3.59101
Case20	2000	3.4932
Case21	2000	4.51492
Case22	2000	3.16412
Case23	2000	4.10836
Case24	2000	5.14321
Case25	2000	4.54103
Case26	2000	5.44315
Case27	2000	4.74373
Case28	2000	4.77951
Case29	2000	4.08586
Case30	2000	1.54152
Case31	2000	5.0894
Case32	2000	4.66366
Case33	2000	4.39964
Case34	2000	3.99944
Case35	2000	4.52054
Con01	2000	4.85698
Con02	2000	4.30587
Con03	2000	3.72172
Con04	2000	5.23338
Con05	2000	4.62889
Con06	2000	4.84573
Con07	2000	4.0824
Con08	2000	4.94657
Con09	2000	4.26793
Con10	2000	4.3933
Con11	2000	4.37137
Con12	2000	4.28105
Con13	2000	4.72295
Con14	2000	3.35528
Con15	2000	4.84327
Con16	2000	4.597
Con17	2000	5.1484
Con18	2000	3.9514
Con19	2000	4.4536
Con20	2000	4.18555
Con21	2000	4.43268
Con22	2000	4.91483
Con23	2000	4.16867
Con24	2000	3.0953
Con25	2000	4.45735
Con26	2000	4.86621
Con27	2000	3.87421
Con28	2000	5.049
Con29	2000	4.12409
Con30	2000	4.17732
Con31	2000	5.04741
Con32	2000	3.08751
Case01	2250	4.17473
Case02	2250	4.36646
Case03	2250	4.66034
Case04	2250	4.71877
Case05	2250	3.71379
Case06	2250	3.84089
Case07	2250	3.95472
Case08	2250	4.23489
Case09	2250	4.1616
Case10	2250	4.52631
Case11	2250	4.35074
Case12	2250	4.41263
Case13	2250	4.65659
Case14	2250	4.51492
Case15	2250	4.78773
Case16	2250	4.53497
Case17	2250	4.61042
Case18	2250	4.48231
Case19	2250	3.60241
Case20	2250	3.50084
Case21	2250	4.52299
Case22	2250	3.17494
Case23	2250	4.11399
Case24	2250	5.15562
Case25	2250	4.55055
Case26	2250	5.45382
Case27	2250	4.75339
Case28	2250	4.78758
Case29	2250	4.0987
Case30	2250	1.55162
Case31	2250	5.09935
Case32	2250	4.67404
Case33	2250	4.40902
Case34	2250	4.01517
Case35	2250	4.53295
Con01	2250	4.87083
Con02	2250	4.32015
Con03	2250	3.72879
Con04	2250	5.24434
Con05	2250	4.63697
Con06	2250	4.85871
Con07	2250	4.08831
Con08	2250	4.95436
Con09	2250	4.2838
Con10	2250	4.40311
Con11	2250	4.38262
Con12	2250	4.28957
Con13	2250	4.73651
Con14	2250	3.36581
Con15	2250	4.85323
Con16	2250	4.60508
Con17	2250	5.1611
Con18	2250	3.96352
Con19	2250	4.46384
Con20	2250	4.19536
Con21	2250	4.44523
Con22	2250	4.92724
Con23	2250	4.1818
Con24	2250	3.10396
Con25	2250	4.46731
Con26	2250	4.87732
Con27	2250	3.88604
Con28	2250	5.06083
Con29	2250	4.13722
Con30	2250	4.18468
Con31	2250	5.0516
Con32	2250	3.10035
Case01	2500	4.18641
Case02	2500	4.37483
Case03	2500	4.66943
Case04	2500	4.728
Case05	2500	3.72288
Case06	2500	3.84926
Case07	2500	3.96207
Case08	2500	4.24326
Case09	2500	4.17069
Case10	2500	4.53641
Case11	2500	4.35867
Case12	2500	4.41955
Case13	2500	4.66972
Case14	2500	4.52545
Case15	2500	4.79711
Case16	2500	4.54074
Case17	2500	4.62225
Case18	2500	4.49587
Case19	2500	3.61337
Case20	2500	3.50633
Case21	2500	4.53151
Case22	2500	3.18446
Case23	2500	4.12164
Case24	2500	5.16499
Case25	2500	4.55704
Case26	2500	5.46219
Case27	2500	4.76089
Case28	2500	4.79754
Case29	2500	4.10663
Case30	2500	1.56028
Case31	2500	5.1083
Case32	2500	4.6801
Case33	2500	4.42287
Case34	2500	4.027
Case35	2500	4.54665
Con01	2500	4.88006
Con02	2500	4.33213
Con03	2500	3.73283
Con04	2500	5.25689
Con05	2500	4.64274
Con06	2500	4.87184
Con07	2500	4.09682
Con08	2500	4.96576
Con09	2500	4.29361
Con10	2500	4.41234
Con11	2500	4.38882
Con12	2500	4.30053
Con13	2500	4.75051
Con14	2500	3.37143
Con15	2500	4.86304
Con16	2500	4.61461
Con17	2500	5.17307
Con18	2500	3.97491
Con19	2500	4.47495
Con20	2500	4.20214
Con21	2500	4.4562
Con22	2500	4.93561
Con23	2500	4.19262
Con24	2500	3.11233
Con25	2500	4.47481
Con26	2500	4.88453
Con27	2500	3.89196
Con28	2500	5.07136
Con29	2500	4.14789
Con30	2500	4.19392
Con31	2500	5.06011
Con32	2500	3.11088
Case01	2750	4.19406
Case02	2750	4.38103
Case03	2750	4.67606
Case04	2750	4.73521
Case05	2750	3.7311
Case06	2750	3.85459
Case07	2750	3.96727
Case08	2750	4.25004
Case09	2750	4.17978
Case10	2750	4.54608
Case11	2750	4.3656
Case12	2750	4.42864
Case13	2750	4.67823
Case14	2750	4.53151
Case15	2750	4.80807
Case16	2750	4.54839
Case17	2750	4.63149
Case18	2750	4.50366
Case19	2750	3.62145
Case20	2750	3.51282
Case21	2750	4.54074
Case22	2750	3.19341
Case23	2750	4.12697
Case24	2750	5.17076
Case25	2750	4.56527
Case26	2750	5.47085
Case27	2750	4.77027
Case28	2750	4.80533
Case29	2750	4.11428
Case30	2750	1.56662
Case31	2750	5.11032
Case32	2750	4.68818
Case33	2750	4.43571
Case34	2750	4.03666
Case35	2750	4.55531
Con01	2750	4.8916
Con02	2750	4.34367
Con03	2750	3.73846
Con04	2750	5.26627
Con05	2750	4.64966
Con06	2750	4.87617
Con07	2750	4.10216
Con08	2750	4.97441
Con09	2750	4.30226
Con10	2750	4.41825
Con11	2750	4.39863
Con12	2750	4.3063
Con13	2750	4.75873
Con14	2750	3.37865
Con15	2750	4.86794
Con16	2750	4.626
Con17	2750	5.18577
Con18	2750	3.98487
Con19	2750	4.48433
Con20	2750	4.20993
Con21	2750	4.46356
Con22	2750	4.94426
Con23	2750	4.20185
Con24	2750	3.11781
Con25	2750	4.48101
Con26	2750	4.89319
Con27	2750	3.90278
Con28	2750	5.07915
Con29	2750	4.15583
Con30	2750	4.20156
Con31	2750	5.06804
Con32	2750	3.11954
Case01	3000	4.20315
Case02	3000	4.38666
Case03	3000	4.68385
Case04	3000	4.74055
Case05	3000	3.73629
Case06	3000	3.85935
Case07	3000	3.9752
Case08	3000	4.25682
Case09	3000	4.18512
Case10	3000	4.55286
Case11	3000	4.37065
Case12	3000	4.43485
Case13	3000	4.68357
Case14	3000	4.5393
Case15	3000	4.81774
Case16	3000	4.55618
Case17	3000	4.63668
Case18	3000	4.51001
Case19	3000	3.62593
Case20	3000	3.51974
Case21	3000	4.54723
Case22	3000	3.20076
Case23	3000	4.13231
Case24	3000	5.1761
Case25	3000	4.57046
Case26	3000	5.47979
Case27	3000	4.77532
Case28	3000	4.81254
Case29	3000	4.12221
Case30	3000	1.57384
Case31	3000	5.11666
Case32	3000	4.69641
Case33	3000	4.44624
Case34	3000	4.04546
Case35	3000	4.56541
Con01	3000	4.89824
Con02	3000	4.34958
Con03	3000	3.74322
Con04	3000	5.27132
Con05	3000	4.65529
Con06	3000	4.88324
Con07	3000	4.10591
Con08	3000	4.98047
Con09	3000	4.30948
Con10	3000	4.42128
Con11	3000	4.40469
Con12	3000	4.3115
Con13	3000	4.76551
Con14	3000	3.38687
Con15	3000	4.87343
Con16	3000	4.63134
Con17	3000	5.19442
Con18	3000	3.99252
Con19	3000	4.4901
Con20	3000	4.21411
Con21	3000	4.47236
Con22	3000	4.95018
Con23	3000	4.2082
Con24	3000	3.12315
Con25	3000	4.48851
Con26	3000	4.89954
Con27	3000	3.90797
Con28	3000	5.08565
Con29	3000	4.16319
Con30	3000	4.20546
Con31	3000	5.07728
Con32	3000	3.12719
Case01	3250	4.20863
Case02	3250	4.39012
Case03	3250	4.68732
Case04	3250	4.74791
Case05	3250	3.74134
Case06	3250	3.86527
Case07	3250	3.98083
Case08	3250	4.26432
Case09	3250	4.18915
Case10	3250	4.55935
Case11	3250	4.37627
Case12	3250	4.43687
Case13	3250	4.68963
Case14	3250	4.54218
Case15	3250	4.82755
Case16	3250	4.56209
Case17	3250	4.64173
Case18	3250	4.51881
Case19	3250	3.63256
Case20	3250	3.52869
Case21	3250	4.55271
Case22	3250	3.20841
Case23	3250	4.13794
Case24	3250	5.1836
Case25	3250	4.57551
Case26	3250	5.48816
Case27	3250	4.78282
Case28	3250	4.82091
Case29	3250	4.12827
Case30	3250	1.57672
Case31	3250	5.12532
Case32	3250	4.7029
Case33	3250	4.45288
Case34	3250	4.0534
Case35	3250	4.57248
Con01	3250	4.90834
Con02	3250	4.35766
Con03	3250	3.75115
Con04	3250	5.27666
Con05	3250	4.65976
Con06	3250	4.89088
Con07	3250	4.11269
Con08	3250	4.98653
Con09	3250	4.31452
Con10	3250	4.42417
Con11	3250	4.40888
Con12	3250	4.31553
Con13	3250	4.77518
Con14	3250	3.39365
Con15	3250	4.87761
Con16	3250	4.6361
Con17	3250	5.20164
Con18	3250	3.99814
Con19	3250	4.49515
Con20	3250	4.21873
Con21	3250	4.47712
Con22	3250	4.95696
Con23	3250	4.21281
Con24	3250	3.12949
Con25	3250	4.49385
Con26	3250	4.90358
Con27	3250	3.91519
Con28	3250	5.09257
Con29	3250	4.17011
Con30	3250	4.2108
Con31	3250	5.08204
Con32	3250	3.13397
Case01	3500	4.21152
Case02	3500	4.39532
Case03	3500	4.68977
Case04	3500	4.75397
Case05	3500	3.74466
Case06	3500	3.86671
Case07	3500	3.98458
Case08	3500	4.26836
Case09	3500	4.19478
Case10	3500	4.56469
Case11	3500	4.37959
Case12	3500	4.44177
Case13	3500	4.69713
Case14	3500	4.54622
Case15	3500	4.83462
Case16	3500	4.56772
Case17	3500	4.64707
Case18	3500	4.52588
Case19	3500	3.6366
Case20	3500	3.53258
Case21	3500	4.55589
Case22	3500	3.21692
Case23	3500	4.14025
Case24	3500	5.18952
Case25	3500	4.57825
Case26	3500	5.49436
Case27	3500	4.78816
Case28	3500	4.82639
Case29	3500	4.1339
Case30	3500	1.58018
Case31	3500	5.13123
Case32	3500	4.70622
Case33	3500	4.45851
Case34	3500	4.05917
Case35	3500	4.57883
Con01	3500	4.91324
Con02	3500	4.36617
Con03	3500	3.7562
Con04	3500	5.28185
Con05	3500	4.6651
Con06	3500	4.89737
Con07	3500	4.11702
Con08	3500	4.99158
Con09	3500	4.32131
Con10	3500	4.43023
Con11	3500	4.41335
Con12	3500	4.31784
Con13	3500	4.78311
Con14	3500	3.40115
Con15	3500	4.8841
Con16	3500	4.64029
Con17	3500	5.2077
Con18	3500	4.00218
Con19	3500	4.50222
Con20	3500	4.22421
Con21	3500	4.48015
Con22	3500	4.96172
Con23	3500	4.21685
Con24	3500	3.13411
Con25	3500	4.50049
Con26	3500	4.90993
Con27	3500	3.92153
Con28	3500	5.09935
Con29	3500	4.17559
Con30	3500	4.21642
Con31	3500	5.08911
Con32	3500	3.14003
Case01	3750	4.21512
Case02	3750	4.39863
Case03	3750	4.69294
Case04	3750	4.76089
Case05	3750	3.74812
Case06	3750	3.86902
Case07	3750	3.99006
Case08	3750	4.27399
Case09	3750	4.19954
Case10	3750	4.57147
Case11	3750	4.38363
Case12	3750	4.44725
Case13	3750	4.70088
Case14	3750	4.55041
Case15	3750	4.84082
Case16	3750	4.57147
Case17	3750	4.65442
Case18	3750	4.53093
Case19	3750	3.63949
Case20	3750	3.53691
Case21	3750	4.56224
Case22	3750	3.22457
Case23	3750	4.1427
Case24	3750	5.19659
Case25	3750	4.58056
Case26	3750	5.50172
Case27	3750	4.79494
Case28	3750	4.8326
Case29	3750	4.13909
Case30	3750	1.58365
Case31	3750	5.13527
Case32	3750	4.71127
Case33	3750	4.46298
Case34	3750	4.06465
Case35	3750	4.58258
Con01	3750	4.91988
Con02	3750	4.37598
Con03	3750	3.76269
Con04	3750	5.28618
Con05	3750	4.66784
Con06	3750	4.90286
Con07	3750	4.11976
Con08	3750	4.99634
Con09	3750	4.3291
Con10	3750	4.43412
Con11	3750	4.41667
Con12	3750	4.32217
Con13	3750	4.78874
Con14	3750	3.40938
Con15	3750	4.88973
Con16	3750	4.64519
Con17	3750	5.21347
Con18	3750	4.0081
Con19	3750	4.5064
Con20	3750	4.22811
Con21	3750	4.48404
Con22	3750	4.9659
Con23	3750	4.22464
Con24	3750	3.13757
Con25	3750	4.50438
Con26	3750	4.91368
Con27	3750	3.92471
Con28	3750	5.10454
Con29	3750	4.18194
Con30	3750	4.2219
Con31	3750	5.09517
Con32	3750	3.14508
Case01	4000	4.21613
Case02	4000	4.40253
Case03	4000	4.69843
Case04	4000	4.76537
Case05	4000	3.75303
Case06	4000	3.87364
Case07	4000	3.99468
Case08	4000	4.27918
Case09	4000	4.20647
Case10	4000	4.57637
Case11	4000	4.39128
Case12	4000	4.45129
Case13	4000	4.70391
Case14	4000	4.55488
Case15	4000	4.84688
Case16	4000	4.5771
Case17	4000	4.65717
Case18	4000	4.53699
Case19	4000	3.64309
Case20	4000	3.5411
Case21	4000	4.56469
Case22	4000	3.22875
Case23	4000	4.14616
Case24	4000	5.19904
Case25	4000	4.58402
Case26	4000	5.50504
Case27	4000	4.79913
Case28	4000	4.83736
Case29	4000	4.14357
Case30	4000	1.58884
Case31	4000	5.13946
Case32	4000	4.71574
Case33	4000	4.4663
Case34	4000	4.07345
Case35	4000	4.58561
Con01	4000	4.9268
Con02	4000	4.37872
Con03	4000	3.76616
Con04	4000	5.28964
Con05	4000	4.67202
Con06	4000	4.90848
Con07	4000	4.1251
Con08	4000	4.99937
Con09	4000	4.33112
Con10	4000	4.43557
Con11	4000	4.41941
Con12	4000	4.32693
Con13	4000	4.79451
Con14	4000	3.4127
Con15	4000	4.89362
Con16	4000	4.64937
Con17	4000	5.21736
Con18	4000	4.01315
Con19	4000	4.51059
Con20	4000	4.2333
Con21	4000	4.48909
Con22	4000	4.97182
Con23	4000	4.23056
Con24	4000	3.14032
Con25	4000	4.50741
Con26	4000	4.91873
Con27	4000	3.9286
Con28	4000	5.10873
Con29	4000	4.18555
Con30	4000	4.22364
Con31	4000	5.09978
Con32	4000	3.14926
Case01	4250	4.22104
Case02	4250	4.40513
Case03	4250	4.70247
Case04	4250	4.76955
Case05	4250	3.75534
Case06	4250	3.87753
Case07	4250	3.99973
Case08	4250	4.28351
Case09	4250	4.21065
Case10	4250	4.5771
Case11	4250	4.39344
Case12	4250	4.45649
Case13	4250	4.70881
Case14	4250	4.55791
Case15	4250	4.85222
Case16	4250	4.57998
Case17	4250	4.65947
Case18	4250	4.53915
Case19	4250	3.64656
Case20	4250	3.54312
Case21	4250	4.56671
Case22	4250	3.23265
Case23	4250	4.14919
Case24	4250	5.20294
Case25	4250	4.58864
Case26	4250	5.51052
Case27	4250	4.80403
Case28	4250	4.84212
Case29	4250	4.14804
Case30	4250	1.59173
Case31	4250	5.1448
Case32	4250	4.71978
Case33	4250	4.4699
Case34	4250	4.0772
Case35	4250	4.58864
Con01	4250	4.93084
Con02	4250	4.38493
Con03	4250	3.76919
Con04	4250	5.29484
Con05	4250	4.67664
Con06	4250	4.91195
Con07	4250	4.12697
Con08	4250	5.00327
Con09	4250	4.33501
Con10	4250	4.43816
Con11	4250	4.42229
Con12	4250	4.32967
Con13	4250	4.79667
Con14	4250	3.4202
Con15	4250	4.89766
Con16	4250	4.65644
Con17	4250	5.22126
Con18	4250	4.01704
Con19	4250	4.51376
Con20	4250	4.23662
Con21	4250	4.49327
Con22	4250	4.97687
Con23	4250	4.23691
Con24	4250	3.14262
Con25	4250	4.50987
Con26	4250	4.92219
Con27	4250	3.93106
Con28	4250	5.1119
Con29	4250	4.19132
Con30	4250	4.22681
Con31	4250	5.10065
Con32	4250	3.15445
Case01	4500	4.22537
Case02	4500	4.40729
Case03	4500	4.7055
Case04	4500	4.77532
Case05	4500	3.75851
Case06	4500	3.88128
Case07	4500	4.00059
Case08	4500	4.28899
Case09	4500	4.21238
Case10	4500	4.5807
Case11	4500	4.39546
Case12	4500	4.46053
Case13	4500	4.71141
Case14	4500	4.5618
Case15	4500	4.85669
Case16	4500	4.58388
Case17	4500	4.66164
Case18	4500	4.54391
Case19	4500	3.64973
Case20	4500	3.54643
Case21	4500	4.57147
Case22	4500	3.23712
Case23	4500	4.15265
Case24	4500	5.2064
Case25	4500	4.59253
Case26	4500	5.51384
Case27	4500	4.80894
Case28	4500	4.84472
Case29	4500	4.15121
Case30	4500	1.59591
Case31	4500	5.14754
Case32	4500	4.72194
Case33	4500	4.47351
Case34	4500	4.08066
Case35	4500	4.59239
Con01	4500	4.93517
Con02	4500	4.3907
Con03	4500	3.7725
Con04	4500	5.29657
Con05	4500	4.67953
Con06	4500	4.91382
Con07	4500	4.12972
Con08	4500	5.00514
Con09	4500	4.33891
Con10	4500	4.44206
Con11	4500	4.42504
Con12	4500	4.3314
Con13	4500	4.80042
Con14	4500	3.42337
Con15	4500	4.90185
Con16	4500	4.65933
Con17	4500	5.22501
Con18	4500	4.02151
Con19	4500	4.51694
Con20	4500	4.24109
Con21	4500	4.49659
Con22	4500	4.98004
Con23	4500	4.24023
Con24	4500	3.14522
Con25	4500	4.51391
Con26	4500	4.92565
Con27	4500	3.93683
Con28	4500	5.11565
Con29	4500	4.19449
Con30	4500	4.23042
Con31	4500	5.10426
Con32	4500	3.15936
Case01	4750	4.22926
Case02	4750	4.40787
Case03	4750	4.70867
Case04	4750	4.77979
Case05	4750	3.76024
Case06	4750	3.88417
Case07	4750	4.00305
Case08	4750	4.29115
Case09	4750	4.21685
Case10	4750	4.5846
Case11	4750	4.39777
Case12	4750	4.46255
Case13	4750	4.71487
Case14	4750	4.56584
Case15	4750	4.85986
Case16	4750	4.5859
Case17	4750	4.66452
Case18	4750	4.54839
Case19	4750	3.65305
Case20	4750	3.55033
Case21	4750	4.57493
Case22	4750	3.2413
Case23	4750	4.15467
Case24	4750	5.20885
Case25	4750	4.59484
Case26	4750	5.51586
Case27	4750	4.81211
Case28	4750	4.84832
Case29	4750	4.15352
Case30	4750	1.59822
Case31	4750	5.14999
Case32	4750	4.72555
Case33	4750	4.47654
Case34	4750	4.08341
Case35	4750	4.59441
Con01	4750	4.93979
Con02	4750	4.39762
Con03	4750	3.77525
Con04	4750	5.29873
Con05	4750	4.68241
Con06	4750	4.91714
Con07	4750	4.1326
Con08	4750	5.00716
Con09	4750	4.34237
Con10	4750	4.44379
Con11	4750	4.42778
Con12	4750	4.33314
Con13	4750	4.80663
Con14	4750	3.42496
Con15	4750	4.90387
Con16	4750	4.66193
Con17	4750	5.2279
Con18	4750	4.02454
Con19	4750	4.52083
Con20	4750	4.24225
Con21	4750	4.50034
Con22	4750	4.98235
Con23	4750	4.24239
Con24	4750	3.14897
Con25	4750	4.51766
Con26	4750	4.92825
Con27	4750	3.94072
Con28	4750	5.11897
Con29	4750	4.19839
Con30	4750	4.23042
Con31	4750	5.10858
Con32	4750	3.16268
Case01	5000	4.23128
Case02	5000	4.41061
Case03	5000	4.71228
Case04	5000	4.78196
Case05	5000	3.76183
Case06	5000	3.88547
Case07	5000	4.00709
Case08	5000	4.29346
Case09	5000	4.21887
Case10	5000	4.58734
Case11	5000	4.40008
Case12	5000	4.46659
Case13	5000	4.71689
Case14	5000	4.56988
Case15	5000	4.86506
Case16	5000	4.5895
Case17	5000	4.66597
Case18	5000	4.55344
Case19	5000	3.65478
Case20	5000	3.55509
Case21	5000	4.57695
Case22	5000	3.24606
Case23	5000	4.15799
Case24	5000	5.21174
Case25	5000	4.59773
Case26	5000	5.51773
Case27	5000	4.81399
Case28	5000	4.85193
Case29	5000	4.15554
Case30	5000	1.60211
Case31	5000	5.15417
Case32	5000	4.72872
Case33	5000	4.48116
Case34	5000	4.08946
Case35	5000	4.59686
Con01	5000	4.94397
Con02	5000	4.40296
Con03	5000	3.77914
Con04	5000	5.30219
Con05	5000	4.68357
Con06	5000	4.91901
Con07	5000	4.13419
Con08	5000	5.00904
Con09	5000	4.34569
Con10	5000	4.44538
Con11	5000	4.43081
Con12	5000	4.3366
Con13	5000	4.8111
Con14	5000	3.42741
Con15	5000	4.90574
Con16	5000	4.66409
Con17	5000	5.23121
Con18	5000	4.0293
Con19	5000	4.52516
Con20	5000	4.24657
Con21	5000	4.50337
Con22	5000	4.98552
Con23	5000	4.24441
Con24	5000	3.14984
Con25	5000	4.52213
Con26	5000	4.92998
Con27	5000	3.94231
Con28	5000	5.12171
Con29	5000	4.20055
Con30	5000	4.23143
Con31	5000	5.11032
Con32	5000	3.16542
Case01	5250	4.23431
Case02	5250	4.41306
Case03	5250	4.71502
Case04	5250	4.78614
Case05	5250	3.76399
Case06	5250	3.8885
Case07	5250	4.00954
Case08	5250	4.29534
Case09	5250	4.22277
Case10	5250	4.59109
Case11	5250	4.40282
Case12	5250	4.47034
Case13	5250	4.72079
Case14	5250	4.57248
Case15	5250	4.86895
Case16	5250	4.59066
Case17	5250	4.66928
Case18	5250	4.5569
Case19	5250	3.65752
Case20	5250	3.55985
Case21	5250	4.57955
Case22	5250	3.2501
Case23	5250	4.1603
Case24	5250	5.21534
Case25	5250	4.60148
Case26	5250	5.52076
Case27	5250	4.81629
Case28	5250	4.85597
Case29	5250	4.15944
Case30	5250	1.605
Case31	5250	5.15821
Case32	5250	4.73175
Case33	5250	4.48419
Case34	5250	4.09206
Case35	5250	4.60018
Con01	5250	4.94715
Con02	5250	4.407
Con03	5250	3.78001
Con04	5250	5.30595
Con05	5250	4.68501
Con06	5250	4.92219
Con07	5250	4.13621
Con08	5250	5.01279
Con09	5250	4.34742
Con10	5250	4.44711
Con11	5250	4.43239
Con12	5250	4.33847
Con13	5250	4.8137
Con14	5250	3.42929
Con15	5250	4.90718
Con16	5250	4.66856
Con17	5250	5.2354
Con18	5250	4.03291
Con19	5250	4.52819
Con20	5250	4.24802
Con21	5250	4.50554
Con22	5250	4.98884
Con23	5250	4.24542
Con24	5250	3.15171
Con25	5250	4.52487
Con26	5250	4.93272
Con27	5250	3.94462
Con28	5250	5.12402
Con29	5250	4.20358
Con30	5250	4.23431
Con31	5250	5.11436
Con32	5250	3.1683
Case01	5500	4.23763
Case02	5500	4.41652
Case03	5500	4.71733
Case04	5500	4.78932
Case05	5500	3.76616
Case06	5500	3.89037
Case07	5500	4.01156
Case08	5500	4.2988
Case09	5500	4.22652
Case10	5500	4.59441
Case11	5500	4.40556
Case12	5500	4.47337
Case13	5500	4.72454
Case14	5500	4.5758
Case15	5500	4.87054
Case16	5500	4.59268
Case17	5500	4.67073
Case18	5500	4.55921
Case19	5500	3.6607
Case20	5500	3.56288
Case21	5500	4.58258
Case22	5500	3.25126
Case23	5500	4.16333
Case24	5500	5.21765
Case25	5500	4.60263
Case26	5500	5.52365
Case27	5500	4.81774
Case28	5500	4.8577
Case29	5500	4.16189
Case30	5500	1.60673
Case31	5500	5.1611
Case32	5500	4.73392
Case33	5500	4.48563
Case34	5500	4.09495
Case35	5500	4.60191
Con01	5500	4.94989
Con02	5500	4.41046
Con03	5500	3.78304
Con04	5500	5.30897
Con05	5500	4.68688
Con06	5500	4.92551
Con07	5500	4.13866
Con08	5500	5.0151
Con09	5500	4.35002
Con10	5500	4.44927
Con11	5500	4.43384
Con12	5500	4.3402
Con13	5500	4.81644
Con14	5500	3.43232
Con15	5500	4.90964
Con16	5500	4.6713
Con17	5500	5.23771
Con18	5500	4.0358
Con19	5500	4.53021
Con20	5500	4.24975
Con21	5500	4.50813
Con22	5500	4.99086
Con23	5500	4.24831
Con24	5500	3.15258
Con25	5500	4.52689
Con26	5500	4.93488
Con27	5500	3.94981
Con28	5500	5.12676
Con29	5500	4.20546
Con30	5500	4.23619
Con31	5500	5.11767
Con32	5500	3.17191
Case01	5750	4.23821
Case02	5750	4.41912
Case03	5750	4.71949
Case04	5750	4.79162
Case05	5750	3.76904
Case06	5750	3.89196
Case07	5750	4.01286
Case08	5750	4.30298
Case09	5750	4.22897
Case10	5750	4.59758
Case11	5750	4.40758
Case12	5750	4.47611
Case13	5750	4.72771
Case14	5750	4.57955
Case15	5750	4.87256
Case16	5750	4.59585
Case17	5750	4.67217
Case18	5750	4.56094
Case19	5750	3.66272
Case20	5750	3.56504
Case21	5750	4.58344
Case22	5750	3.25371
Case23	5750	4.16751
Case24	5750	5.21895
Case25	5750	4.60364
Case26	5750	5.52552
Case27	5750	4.82106
Case28	5750	4.86174
Case29	5750	4.16405
Case30	5750	1.60861
Case31	5750	5.1624
Case32	5750	4.73594
Case33	5750	4.48823
Case34	5750	4.09812
Case35	5750	4.60508
Con01	5750	4.95176
Con02	5750	4.41393
Con03	5750	3.78462
Con04	5750	5.31172
Con05	5750	4.68847
Con06	5750	4.92753
Con07	5750	4.14155
Con08	5750	5.01784
Con09	5750	4.35333
Con10	5750	4.45072
Con11	5750	4.43614
Con12	5750	4.34136
Con13	5750	4.81745
Con14	5750	3.43664
Con15	5750	4.91122
Con16	5750	4.67332
Con17	5750	5.24131
Con18	5750	4.03883
Con19	5750	4.53266
Con20	5750	4.25133
Con21	5750	4.51001
Con22	5750	4.9923
Con23	5750	4.25032
Con24	5750	3.15517
Con25	5750	4.52949
Con26	5750	4.93633
Con27	5750	3.95169
Con28	5750	5.12922
Con29	5750	4.20733
Con30	5750	4.2372
Con31	5750	5.11868
Con32	5750	3.17552
Case01	6000	4.24167
Case02	6000	4.42056
Case03	6000	4.72194
Case04	6000	4.79292
Case05	6000	3.77149
Case06	6000	3.89398
Case07	6000	4.01488
Case08	6000	4.305
Case09	6000	4.23157
Case10	6000	4.60119
Case11	6000	4.41018
Case12	6000	4.47784
Case13	6000	4.73118
Case14	6000	4.58243
Case15	6000	4.87602
Case16	6000	4.59715
Case17	6000	4.67433
Case18	6000	4.5644
Case19	6000	3.66488
Case20	6000	3.56908
Case21	6000	4.58676
Case22	6000	3.25703
Case23	6000	4.16953
Case24	6000	5.22212
Case25	6000	4.60581
Case26	6000	5.52711
Case27	6000	4.82308
Case28	6000	4.86318
Case29	6000	4.16549
Case30	6000	1.61178
Case31	6000	5.16572
Case32	6000	4.73767
Case33	6000	4.49039
Case34	6000	4.10202
Case35	6000	4.60739
Con01	6000	4.95407
Con02	6000	4.41465
Con03	6000	3.78693
Con04	6000	5.31503
Con05	6000	4.69006
Con06	6000	4.93012
Con07	6000	4.14357
Con08	6000	5.01798
Con09	6000	4.35506
Con10	6000	4.45274
Con11	6000	4.43802
Con12	6000	4.34381
Con13	6000	4.81947
Con14	6000	3.4378
Con15	6000	4.9131
Con16	6000	4.6752
Con17	6000	5.24333
Con18	6000	4.04157
Con19	6000	4.5341
Con20	6000	4.25436
Con21	6000	4.51174
Con22	6000	4.99418
Con23	6000	4.25119
Con24	6000	3.15691
Con25	6000	4.53324
Con26	6000	4.93806
Con27	6000	3.95428
Con28	6000	5.13138
Con29	6000	4.20964
Con30	6000	4.23922
Con31	6000	5.12114
Con32	6000	3.17638
Case01	6250	4.24369
Case02	6250	4.42157
Case03	6250	4.72367
Case04	6250	4.79711
Case05	6250	3.77279
Case06	6250	3.89499
Case07	6250	4.01733
Case08	6250	4.30688
Case09	6250	4.23417
Case10	6250	4.60335
Case11	6250	4.41277
Case12	6250	4.48087
Case13	6250	4.73305
Case14	6250	4.58402
Case15	6250	4.87905
Case16	6250	4.59931
Case17	6250	4.67592
Case18	6250	4.56729
Case19	6250	3.66776
Case20	6250	3.57067
Case21	6250	4.58763
Case22	6250	3.25934
Case23	6250	4.17054
Case24	6250	5.22472
Case25	6250	4.60768
Case26	6250	5.52841
Case27	6250	4.82524
Case28	6250	4.8652
Case29	6250	4.16607
Case30	6250	1.61438
Case31	6250	5.1673
Case32	6250	4.73983
Case33	6250	4.49342
Case34	6250	4.10389
Case35	6250	4.60956
Con01	6250	4.95652
Con02	6250	4.41652
Con03	6250	3.78809
Con04	6250	5.31763
Con05	6250	4.69165
Con06	6250	4.93214
Con07	6250	4.14544
Con08	6250	5.01986
Con09	6250	4.35723
Con10	6250	4.45389
Con11	6250	4.43961
Con12	6250	4.34482
Con13	6250	4.82077
Con14	6250	3.44227
Con15	6250	4.91598
Con16	6250	4.6778
Con17	6250	5.24564
Con18	6250	4.04474
Con19	6250	4.53497
Con20	6250	4.25566
Con21	6250	4.51492
Con22	6250	4.99461
Con23	6250	4.25436
Con24	6250	3.15907
Con25	6250	4.53439
Con26	6250	4.94037
Con27	6250	3.95573
Con28	6250	5.1334
Con29	6250	4.21209
Con30	6250	4.23994
Con31	6250	5.12272
Con32	6250	3.17898
Case01	6500	4.24715
Case02	6500	4.42229
Case03	6500	4.72584
Case04	6500	4.79941
Case05	6500	3.77452
Case06	6500	3.89658
Case07	6500	4.01834
Case08	6500	4.30948
Case09	6500	4.2359
Case10	6500	4.60379
Case11	6500	4.41465
Case12	6500	4.48245
Case13	6500	4.73536
Case14	6500	4.58676
Case15	6500	4.88078
Case16	6500	4.60032
Case17	6500	4.67852
Case18	6500	4.56959
Case19	6500	3.6695
Case20	6500	3.57428
Case21	6500	4.58806
Case22	6500	3.26208
Case23	6500	4.17213
Case24	6500	5.22703
Case25	6500	4.60941
Case26	6500	5.53173
Case27	6500	4.82755
Case28	6500	4.86765
Case29	6500	4.16925
Case30	6500	1.61769
Case31	6500	5.16947
Case32	6500	4.74214
Case33	6500	4.49558
Case34	6500	4.10577
Case35	6500	4.6123
Con01	6500	4.95854
Con02	6500	4.41955
Con03	6500	3.78924
Con04	6500	5.31951
Con05	6500	4.69395
Con06	6500	4.93431
Con07	6500	4.14688
Con08	6500	5.01957
Con09	6500	4.36026
Con10	6500	4.45461
Con11	6500	4.44119
Con12	6500	4.3467
Con13	6500	4.82365
Con14	6500	3.44429
Con15	6500	4.91772
Con16	6500	4.6801
Con17	6500	5.2478
Con18	6500	4.04892
Con19	6500	4.5367
Con20	6500	4.25711
Con21	6500	4.51708
Con22	6500	4.99591
Con23	6500	4.25638
Con24	6500	3.1582
Con25	6500	4.53612
Con26	6500	4.94267
Con27	6500	3.95688
Con28	6500	5.13571
Con29	6500	4.21512
Con30	6500	4.24225
Con31	6500	5.12373
Con32	6500	3.17999
Case01	6750	4.24816
Case02	6750	4.42504
Case03	6750	4.72757
Case04	6750	4.80259
Case05	6750	3.77467
Case06	6750	3.89715
Case07	6750	4.02079
Case08	6750	4.31178
Case09	6750	4.23835
Case10	6750	4.60494
Case11	6750	4.4158
Case12	6750	4.48404
Case13	6750	4.73695
Case14	6750	4.58893
Case15	6750	4.88338
Case16	6750	4.60133
Case17	6750	4.67996
Case18	6750	4.57233
Case19	6750	3.67123
Case20	6750	3.57558
Case21	6750	4.59008
Case22	6750	3.26424
Case23	6750	4.17314
Case24	6750	5.22891
Case25	6750	4.61042
Case26	6750	5.53303
Case27	6750	4.8287
Case28	6750	4.86967
Case29	6750	4.17026
Case30	6750	1.61885
Case31	6750	5.17076
Case32	6750	4.74402
Case33	6750	4.49818
Case34	6750	4.10793
Case35	6750	4.61331
Con01	6750	4.96028
Con02	6750	4.42229
Con03	6750	3.79212
Con04	6750	5.32196
Con05	6750	4.69655
Con06	6750	4.93589
Con07	6750	4.14847
Con08	6750	5.02116
Con09	6750	4.36199
Con10	6750	4.45692
Con11	6750	4.44321
Con12	6750	4.34814
Con13	6750	4.82683
Con14	6750	3.44689
Con15	6750	4.91873
Con16	6750	4.68155
Con17	6750	5.2504
Con18	6750	4.0534
Con19	6750	4.5393
Con20	6750	4.25725
Con21	6750	4.5191
Con22	6750	4.99894
Con23	6750	4.25855
Con24	6750	3.16008
Con25	6750	4.53829
Con26	6750	4.94426
Con27	6750	3.95832
Con28	6750	5.13729
Con29	6750	4.21743
Con30	6750	4.24383
Con31	6750	5.12518
Con32	6750	3.18186
Case01	7000	4.24903
Case02	7000	4.42576
Case03	7000	4.72858
Case04	7000	4.8036
Case05	7000	3.77611
Case06	7000	3.89816
Case07	7000	4.02267
Case08	7000	4.31308
Case09	7000	4.23965
Case10	7000	4.60739
Case11	7000	4.41811
Case12	7000	4.48621
Case13	7000	4.73868
Case14	7000	4.59239
Case15	7000	4.88526
Case16	7000	4.60436
Case17	7000	4.6814
Case18	7000	4.5745
Case19	7000	3.67238
Case20	7000	3.57615
Case21	7000	4.59282
Case22	7000	3.26525
Case23	7000	4.17502
Case24	7000	5.23107
Case25	7000	4.61114
Case26	7000	5.5349
Case27	7000	4.83101
Case28	7000	4.87155
Case29	7000	4.173
Case30	7000	1.62
Case31	7000	5.17408
Case32	7000	4.74531
Case33	7000	4.49919
Case34	7000	4.10894
Case35	7000	4.61475
Con01	7000	4.96157
Con02	7000	4.42532
Con03	7000	3.79414
Con04	7000	5.32369
Con05	7000	4.699
Con06	7000	4.93705
Con07	7000	4.15107
Con08	7000	5.02303
Con09	7000	4.36387
Con10	7000	4.45793
Con11	7000	4.4448
Con12	7000	4.34828
Con13	7000	4.82726
Con14	7000	3.44905
Con15	7000	4.91988
Con16	7000	4.68241
Con17	7000	5.25242
Con18	7000	4.05571
Con19	7000	4.54016
Con20	7000	4.25797
Con21	7000	4.52155
Con22	7000	5.00082
Con23	7000	4.25956
Con24	7000	3.16138
Con25	7000	4.53944
Con26	7000	4.94585
Con27	7000	3.96034
Con28	7000	5.13874
Con29	7000	4.21902
Con30	7000	4.24441
Con31	7000	5.12734
Con32	7000	3.18345
Case01	7250	4.25032
Case02	7250	4.42734
Case03	7250	4.72959
Case04	7250	4.80461
Case05	7250	3.7777
Case06	7250	3.89961
Case07	7250	4.02353
Case08	7250	4.31452
Case09	7250	4.24239
Case10	7250	4.60869
Case11	7250	4.41999
Case12	7250	4.48779
Case13	7250	4.74026
Case14	7250	4.59527
Case15	7250	4.88713
Case16	7250	4.60523
Case17	7250	4.68241
Case18	7250	4.5758
Case19	7250	3.67483
Case20	7250	3.57745
Case21	7250	4.59398
Case22	7250	3.26742
Case23	7250	4.1766
Case24	7250	5.23309
Case25	7250	4.61287
Case26	7250	5.53735
Case27	7250	4.83289
Case28	7250	4.87213
Case29	7250	4.17487
Case30	7250	1.62159
Case31	7250	5.17697
Case32	7250	4.74661
Case33	7250	4.50323
Case34	7250	4.11125
Case35	7250	4.61576
Con01	7250	4.96417
Con02	7250	4.42677
Con03	7250	3.79501
Con04	7250	5.32557
Con05	7250	4.70001
Con06	7250	4.93863
Con07	7250	4.15323
Con08	7250	5.02419
Con09	7250	4.3656
Con10	7250	4.45952
Con11	7250	4.44653
Con12	7250	4.34915
Con13	7250	4.8287
Con14	7250	3.45093
Con15	7250	4.92219
Con16	7250	4.68515
Con17	7250	5.25343
Con18	7250	4.05801
Con19	7250	4.54132
Con20	7250	4.25898
Con21	7250	4.52357
[truncated: 16,195 more rows]
