# Supplementary material for: Characterization of gut microbiota in adults with coronary atherosclerosis
Source: PeerJ journal article supplement (doi:10.7717/peerj.15245), 2023-05-18
Supplement: Raw_Data.zip [file Figure2A_PCoA_coordinate.xls]

sample	group	PC1	PC2	PC3	PC4	PC5	PC6	PC7	PC8	PC9	PC10	PC11	PC12	PC13	PC14	PC15	PC16	PC17	PC18	PC19	PC20	PC21	PC22	PC23	PC24	PC25	PC26	PC27	PC28	PC29	PC30	PC31	PC32	PC33	PC34	PC35	PC36	PC37	PC38	PC39	PC40	PC41	PC42	PC43	PC44	PC45	PC46	PC47	PC48
C01	Control	0.1341	-0.0066	0.0293	-0.0414	0.0043	-0.0086	0.0199	-0.0263	0.0241	-0.0288	0.0030	-0.0164	0.0175	-0.0079	0.0722	-0.0489	0.0141	0.0132	-0.0555	-0.0109	0.0245	0.0184	0.0068	-0.0129	-0.0167	0.0276	0.0086	0.0263	-0.0112	-0.0102	-0.0109	-0.0035	0.0156	0.0060	0.0303	0.0129	-0.0332	-0.0170	-0.0029	-0.0149	-0.0017	0.0009	-0.0043	0.0342	0.0072	-0.0187	-0.0009	0.0117
C32	Control	-0.0186	-0.0651	0.0647	-0.0500	-0.1034	0.0463	0.0312	-0.0152	-0.0964	-0.0262	0.0249	0.0598	-0.0300	0.0183	0.0646	0.0379	0.0099	-0.0110	0.0010	0.0352	0.0290	-0.0093	-0.0047	-0.0097	0.0146	0.0326	0.0262	-0.0325	-0.0454	-0.0219	-0.0002	-0.0141	0.0035	0.0110	0.0029	-0.0219	0.0006	-0.0110	-0.0083	-0.0014	0.0032	0.0004	-0.0116	-0.0100	0.0175	0.0212	-0.0138	-0.0010
C31	Control	-0.0018	-0.0119	0.0480	0.0822	-0.0521	0.0024	0.0387	0.0130	-0.0631	0.0742	0.0746	0.0280	-0.0196	0.0465	0.0147	-0.0219	0.0063	0.0068	-0.0409	-0.0216	-0.0349	0.0091	0.0049	-0.0235	0.0328	0.0133	0.0047	-0.0198	-0.0008	-0.0033	-0.0058	0.0013	-0.0010	0.0003	0.0046	0.0222	-0.0220	0.0042	0.0154	-0.0005	-0.0035	-0.0157	0.0254	0.0135	-0.0051	-0.0129	0.0165	-0.0081
C30	Control	-0.1379	-0.0698	-0.0040	-0.0424	-0.0058	-0.0071	-0.0065	-0.0562	-0.0409	0.0812	0.0105	-0.0322	-0.0903	0.0244	-0.0127	-0.0078	0.0251	-0.0720	-0.0127	-0.0359	0.0801	0.0104	0.0255	0.0135	0.0002	0.0209	-0.0223	0.0079	0.0101	0.0093	-0.0118	-0.0091	-0.0008	0.0183	-0.0218	0.0041	-0.0111	-0.0113	0.0035	0.0086	0.0119	0.0153	0.0034	0.0003	-0.0184	0.0018	0.0027	-0.0051
C29	Control	0.0724	-0.0012	0.0989	0.0622	-0.0340	-0.0133	0.0125	0.0626	-0.0479	-0.0698	-0.0172	0.0210	-0.0026	-0.0096	-0.0109	0.0430	0.0395	-0.0055	-0.0183	0.0107	0.0102	0.0375	0.0294	-0.0210	-0.0178	-0.0051	-0.0234	-0.0144	-0.0171	-0.0340	0.0068	0.0314	0.0135	-0.0225	-0.0141	0.0143	-0.0016	0.0151	-0.0054	0.0004	0.0155	0.0204	-0.0025	0.0181	-0.0136	-0.0007	0.0062	0.0112
C28	Control	0.0337	0.0096	0.1366	0.0004	-0.0096	-0.0178	0.0676	-0.0351	0.0318	-0.0360	-0.0401	0.0309	-0.0122	0.0041	-0.0373	-0.0637	-0.0571	-0.0070	0.0024	0.0056	-0.0209	-0.0240	-0.0318	-0.0091	-0.0240	0.0003	-0.0498	-0.0102	0.0099	-0.0347	0.0285	0.0027	-0.0125	-0.0008	-0.0149	-0.0041	-0.0186	-0.0168	0.0182	-0.0048	-0.0189	0.0007	0.0076	-0.0087	-0.0047	0.0295	0.0046	0.0035
C27	Control	-0.0085	-0.0400	0.0893	-0.0518	0.0073	0.0806	0.0360	0.0279	0.0207	0.0573	0.0335	-0.0287	-0.0917	-0.0781	-0.0036	-0.0032	-0.0333	0.0302	0.0257	-0.0241	-0.0207	0.0104	-0.0435	-0.0089	-0.0264	0.0067	0.0451	0.0322	-0.0025	0.0076	0.0001	0.0417	-0.0104	-0.0119	-0.0034	-0.0019	-0.0014	0.0007	-0.0128	-0.0059	0.0007	0.0040	0.0009	-0.0097	0.0085	-0.0179	0.0099	0.0020
C26	Control	-0.0521	-0.0090	0.1049	0.0148	0.0112	-0.1217	0.0215	0.0224	0.0074	-0.0203	-0.0054	-0.0394	-0.0174	-0.0293	-0.0385	-0.0193	-0.0029	-0.0303	-0.0088	0.0498	-0.0110	0.0203	0.0007	0.0045	0.0328	0.0036	0.0302	-0.0207	0.0284	-0.0093	0.0034	-0.0128	0.0026	-0.0082	0.0045	0.0099	0.0122	-0.0004	-0.0031	0.0006	0.0131	-0.0047	-0.0036	-0.0176	-0.0020	-0.0284	-0.0198	0.0086
C25	Control	0.0185	-0.0414	0.0941	-0.0439	-0.0409	0.0479	0.0199	0.0107	-0.0101	-0.0080	-0.0299	-0.0693	-0.0106	0.0860	-0.0299	0.0201	0.0142	0.0016	0.0473	0.0712	-0.0069	-0.0480	-0.0071	0.0309	-0.0371	0.0253	0.0219	0.0313	-0.0031	0.0106	0.0010	-0.0184	0.0058	-0.0001	-0.0044	0.0027	-0.0056	0.0227	0.0096	0.0155	-0.0169	0.0008	-0.0016	0.0018	-0.0173	-0.0158	-0.0116	0.0010
C23	Control	-0.0506	-0.1633	0.0661	0.0015	-0.0568	0.0318	0.0801	0.0211	-0.0182	-0.0817	-0.0579	0.0183	0.0419	0.0223	-0.0497	-0.0080	-0.0460	-0.0348	-0.0238	-0.0528	0.0048	0.0231	-0.0082	0.0150	0.0014	-0.0225	0.0077	0.0335	-0.0205	0.0405	-0.0077	-0.0021	0.0290	0.0094	0.0297	-0.0016	0.0241	-0.0182	0.0039	0.0118	-0.0013	-0.0104	-0.0039	-0.0018	0.0066	-0.0031	0.0152	-0.0113
C22	Control	0.0533	-0.0025	0.0666	0.0702	-0.0626	-0.0109	0.0335	-0.0592	0.0155	0.0551	-0.0334	-0.0226	0.0135	0.0159	-0.0400	0.0497	0.0345	0.0240	0.0305	0.0027	-0.0133	0.0141	0.0360	0.0174	-0.0316	-0.0106	-0.0086	-0.0253	0.0180	0.0189	0.0054	-0.0103	-0.0010	-0.0065	0.0015	-0.0103	0.0040	-0.0037	0.0238	-0.0141	0.0142	0.0100	0.0246	0.0069	0.0169	0.0086	0.0224	-0.0015
C21	Control	-0.0090	-0.0802	0.0167	-0.0359	-0.0328	-0.0046	-0.0888	0.0536	-0.0022	0.0420	0.0265	-0.0220	0.0396	0.0077	0.0032	-0.0270	-0.0317	-0.0156	0.0129	-0.0039	-0.0312	-0.0099	0.0686	-0.0291	-0.0335	-0.0305	0.0278	-0.0018	0.0167	-0.0355	0.0164	-0.0256	-0.0000	0.0183	0.0042	0.0145	-0.0022	0.0039	0.0053	0.0024	-0.0262	-0.0204	-0.0123	0.0111	0.0105	0.0092	0.0001	0.0020
C20	Control	-0.1285	-0.0082	0.0790	-0.0732	-0.0392	-0.0383	-0.0991	-0.0323	0.0441	-0.0312	0.0261	0.0658	0.0085	0.0179	0.0163	-0.0389	0.0602	0.0339	-0.0280	-0.0308	-0.0014	0.0389	0.0198	0.0372	-0.0346	-0.0022	-0.0101	0.0186	-0.0122	0.0127	0.0083	0.0104	-0.0117	-0.0050	-0.0074	-0.0106	0.0330	0.0117	-0.0115	-0.0201	-0.0019	-0.0212	0.0173	-0.0140	-0.0090	0.0071	-0.0182	0.0035
C19	Control	-0.0300	-0.0630	0.0099	-0.0545	0.0152	-0.0716	-0.1162	-0.0152	-0.0017	-0.0179	0.0126	-0.0033	-0.0177	-0.0023	-0.0647	0.0408	-0.0186	-0.0051	-0.0209	-0.0094	-0.0111	-0.0095	-0.0093	-0.0003	0.0357	0.0378	0.0223	0.0101	-0.0020	-0.0163	0.0296	-0.0099	0.0206	-0.0198	0.0187	0.0096	-0.0088	-0.0101	0.0007	0.0020	0.0066	0.0148	0.0093	0.0001	-0.0038	0.0183	-0.0001	0.0033
C18	Control	0.0624	-0.0674	0.0177	-0.0270	-0.0155	-0.0422	-0.1176	-0.0483	0.0007	-0.0002	0.0084	0.0163	-0.0226	-0.0478	0.0148	0.0099	-0.0493	0.0345	0.0069	0.0089	-0.0124	-0.0350	-0.0026	0.0232	-0.0027	0.0042	-0.0101	-0.0065	-0.0061	-0.0163	-0.0363	0.0184	-0.0023	-0.0072	0.0104	-0.0408	-0.0098	-0.0017	0.0150	0.0394	0.0084	-0.0132	0.0115	0.0055	0.0097	-0.0051	0.0049	-0.0115
C17	Control	0.1102	-0.0069	0.0619	-0.0066	0.0036	0.0176	-0.0728	0.0493	0.0837	0.0230	-0.0231	0.0490	0.0314	0.0586	0.0456	0.0043	0.0393	-0.0245	-0.0072	0.0120	-0.0028	0.0042	-0.0032	0.0184	0.0150	0.0007	-0.0300	-0.0062	0.0058	0.0311	-0.0241	-0.0037	-0.0181	-0.0127	0.0051	0.0145	-0.0327	-0.0151	0.0003	0.0142	-0.0063	0.0100	-0.0166	-0.0426	0.0165	-0.0105	0.0136	0.0104
C24	Control	-0.1221	-0.0873	0.0499	-0.0969	-0.0527	0.0937	0.0766	0.0308	0.0173	-0.0167	0.0427	0.0277	0.0810	-0.0498	-0.0335	-0.0093	0.0357	0.0097	0.0227	-0.0202	0.0256	-0.0176	0.0166	-0.0009	0.0354	-0.0163	-0.0095	-0.0207	0.0462	-0.0199	-0.0169	0.0158	-0.0370	-0.0136	-0.0090	-0.0011	-0.0101	0.0047	-0.0083	0.0117	0.0064	0.0057	-0.0035	0.0081	-0.0019	-0.0066	-0.0085	0.0069
C15	Control	-0.0199	-0.0971	-0.0951	0.0188	-0.1071	-0.0151	-0.0095	0.0299	0.0384	-0.0267	0.0075	0.0413	-0.0525	-0.0240	0.0113	-0.0008	0.0093	0.0166	-0.0351	0.0234	-0.0149	-0.0346	-0.0285	-0.0035	-0.0263	-0.0231	0.0065	0.0182	0.0115	0.0034	0.0212	-0.0216	-0.0180	0.0469	-0.0215	0.0053	-0.0040	0.0110	0.0007	-0.0096	0.0195	0.0001	0.0072	-0.0007	0.0058	-0.0052	0.0088	0.0222
C16	Control	-0.0084	-0.0746	-0.0033	0.0183	-0.0198	-0.0125	-0.0623	0.0516	-0.0383	0.0573	-0.0094	0.0176	0.0315	-0.0144	0.0289	0.0367	-0.0014	0.0252	-0.0242	-0.0218	0.0013	-0.0297	-0.0345	0.0501	0.0268	-0.0215	-0.0127	0.0305	0.0344	-0.0082	-0.0056	0.0051	0.0179	-0.0122	-0.0053	0.0023	0.0135	-0.0177	0.0142	-0.0165	-0.0055	0.0127	-0.0253	0.0231	-0.0113	0.0046	0.0027	-0.0004
C02	Control	0.1039	0.0211	-0.0313	-0.0526	-0.0246	0.0083	0.0080	-0.0035	0.0090	-0.0178	-0.0083	-0.0063	-0.0253	0.0138	0.0283	0.0271	-0.0065	0.0582	0.0287	-0.0266	0.0456	0.0463	0.0218	0.0065	-0.0224	0.0173	0.0194	-0.0235	0.0336	-0.0164	0.0010	-0.0034	-0.0045	-0.0035	0.0101	0.0191	0.0169	-0.0048	-0.0216	0.0216	-0.0221	-0.0095	0.0215	-0.0023	-0.0030	0.0013	0.0019	-0.0133
C03	Control	-0.0768	-0.0142	-0.0773	-0.0868	0.0074	-0.0115	0.0545	0.0180	0.0652	0.0404	-0.0517	-0.0120	0.0477	-0.0372	0.0119	-0.0043	0.0445	0.0207	0.0016	-0.0366	-0.0327	0.0183	-0.0171	-0.0105	0.0207	0.0470	0.0298	-0.0175	-0.0168	-0.0048	0.0242	-0.0132	-0.0009	0.0207	-0.0158	-0.0189	-0.0129	0.0040	0.0195	0.0189	-0.0063	0.0171	-0.0070	-0.0033	0.0006	0.0114	0.0078	-0.0070
C04	Control	0.0661	-0.0340	-0.0184	-0.0427	0.0296	-0.0092	-0.0002	-0.0095	0.0485	0.0537	-0.0026	0.0097	0.0378	0.0109	0.0068	-0.0852	0.0036	-0.0458	0.0133	-0.0038	0.0025	-0.0221	-0.0050	-0.0230	-0.0223	0.0125	0.0106	-0.0136	-0.0045	-0.0048	-0.0011	0.0062	0.0052	-0.0180	0.0068	0.0117	0.0425	-0.0024	0.0195	0.0008	0.0171	0.0294	0.0093	0.0083	0.0116	-0.0099	-0.0151	-0.0168
C05	Control	0.0125	0.0172	-0.0747	-0.0479	0.0179	-0.0113	0.0038	0.0311	-0.0835	0.0385	-0.0820	-0.0075	-0.0069	0.0002	-0.0617	-0.0275	0.0661	0.0208	-0.0456	0.0076	-0.0321	-0.0192	-0.0390	-0.0379	-0.0452	0.0222	-0.0260	-0.0290	0.0178	0.0171	-0.0207	0.0021	0.0043	-0.0053	0.0222	-0.0134	-0.0003	-0.0173	-0.0323	0.0090	0.0067	-0.0190	-0.0084	-0.0006	-0.0082	0.0092	-0.0050	0.0044
C07	Control	-0.0970	-0.1066	-0.1353	0.0688	0.0156	-0.0103	0.0275	0.0085	0.0352	-0.0392	0.0203	0.0488	-0.0811	0.0248	0.0041	-0.0160	0.0196	0.0023	0.0462	-0.0107	-0.0171	-0.0206	-0.0132	-0.0118	0.0103	0.0013	-0.0206	-0.0217	-0.0224	0.0076	-0.0044	0.0041	-0.0023	-0.0273	0.0165	0.0252	0.0101	0.0049	0.0033	0.0024	-0.0267	0.0050	0.0072	0.0101	0.0107	0.0035	-0.0024	-0.0035
C08	Control	-0.0116	-0.0886	0.0161	0.0394	0.1619	-0.0209	0.0163	0.0079	-0.0626	0.0160	0.0217	-0.0109	-0.0182	-0.0243	0.0077	-0.0169	0.0596	-0.0062	0.0011	-0.0291	-0.0132	-0.0205	0.0393	0.0293	-0.0120	-0.0081	0.0228	0.0029	0.0013	0.0042	0.0055	-0.0198	0.0172	-0.0204	-0.0069	-0.0139	-0.0019	0.0146	0.0027	0.0119	-0.0021	-0.0131	-0.0042	-0.0093	0.0044	0.0032	0.0211	0.0205
C06	Control	0.0433	-0.0471	0.0302	0.1043	0.0551	-0.0627	0.0083	-0.0748	-0.0186	0.0025	-0.0372	0.0018	0.0250	-0.0464	0.0113	0.0193	-0.0007	0.0101	0.0144	-0.0264	0.0441	-0.0105	0.0070	-0.0503	0.0005	-0.0365	0.0158	-0.0088	-0.0213	-0.0201	0.0080	-0.0145	-0.0075	0.0083	0.0009	-0.0039	0.0089	-0.0017	-0.0083	-0.0006	0.0080	-0.0049	-0.0098	-0.0317	0.0076	-0.0148	0.0105	-0.0032
C10	Control	-0.0917	-0.0899	-0.0317	-0.0327	0.0411	-0.0545	0.0113	-0.0501	-0.0404	0.0155	-0.0138	-0.0060	0.0488	0.0518	0.0498	-0.0023	-0.0142	-0.0064	0.0357	0.0036	0.0259	0.0038	-0.0353	-0.0004	0.0074	-0.0541	-0.0002	-0.0073	-0.0089	0.0202	0.0402	0.0222	-0.0172	-0.0077	0.0340	-0.0174	-0.0342	0.0287	-0.0059	0.0008	-0.0016	0.0001	0.0087	0.0070	-0.0163	-0.0033	-0.0069	0.0015
C11	Control	-0.1144	-0.0571	0.0477	0.0088	0.1416	0.0218	0.0179	-0.0192	-0.0550	-0.0269	0.0666	-0.0521	0.0061	0.0027	0.0276	-0.0091	-0.0361	0.0659	-0.0295	0.0291	-0.0218	0.0409	-0.0144	0.0107	-0.0152	0.0046	-0.0314	-0.0038	0.0129	0.0161	-0.0111	-0.0058	-0.0153	0.0169	-0.0104	0.0315	-0.0035	-0.0123	0.0161	-0.0031	0.0129	-0.0047	-0.0131	-0.0116	0.0080	0.0126	-0.0091	-0.0202
C12	Control	-0.1065	-0.1367	-0.0319	0.0225	0.0678	-0.0039	0.0108	-0.0070	0.0375	-0.0345	-0.0344	-0.0253	0.0062	-0.0398	0.0500	0.0240	0.0017	-0.0380	0.0131	0.0478	-0.0424	0.0271	0.0344	-0.0207	-0.0110	0.0365	-0.0457	0.0020	0.0030	-0.0057	-0.0224	0.0216	0.0126	0.0017	-0.0077	-0.0222	0.0088	0.0160	0.0006	-0.0167	-0.0141	-0.0031	-0.0042	0.0111	-0.0037	-0.0018	0.0097	0.0013
C13	Control	0.0838	-0.0551	-0.0117	0.0466	0.0305	-0.0090	-0.0444	0.0539	-0.0608	-0.0045	0.0205	-0.0269	-0.0015	0.0193	-0.0528	-0.0298	0.0180	0.0393	0.0186	-0.0030	0.0014	-0.0021	0.0010	0.0049	0.0150	-0.0084	0.0012	-0.0106	-0.0439	0.0025	-0.0009	0.0212	-0.0024	-0.0049	-0.0285	-0.0091	-0.0065	-0.0161	-0.0026	-0.0088	-0.0216	0.0222	-0.0018	-0.0032	0.0211	-0.0075	-0.0255	0.0002
C14	Control	0.0250	-0.1153	0.0011	0.0343	-0.0828	0.0169	-0.0789	-0.0259	0.0262	0.0164	-0.0260	-0.0065	0.0142	-0.0347	-0.0323	0.0199	-0.0330	0.0052	0.0158	0.0137	-0.0242	0.0095	0.0042	-0.0376	0.0360	0.0305	-0.0097	-0.0091	0.0090	0.0340	-0.0010	0.0021	-0.0019	0.0098	0.0139	0.0134	-0.0113	0.0100	-0.0267	-0.0236	0.0111	0.0036	0.0087	-0.0040	-0.0090	-0.0053	-0.0010	-0.0082
C09	Control	-0.0016	-0.0718	0.0515	0.1077	0.1054	-0.0438	0.0220	0.0613	0.1065	0.0159	0.0447	-0.0029	0.0470	0.0512	0.0090	0.0636	0.0080	0.0054	-0.0091	0.0004	0.0247	-0.0373	-0.0478	-0.0269	-0.0112	-0.0022	0.0213	0.0041	-0.0060	-0.0057	-0.0144	-0.0076	-0.0028	0.0183	-0.0235	-0.0023	0.0100	-0.0191	-0.0308	0.0083	0.0041	-0.0063	0.0179	0.0164	-0.0135	0.0116	-0.0074	-0.0067
T20	Case	-0.0077	0.0373	-0.0366	-0.0272	-0.0153	-0.0252	-0.0211	0.0057	0.0021	0.0067	-0.0088	-0.0541	-0.0093	0.0634	0.0055	0.0193	-0.0114	-0.0447	-0.0204	-0.0092	-0.0263	0.0295	-0.0320	0.0386	0.0302	-0.0153	-0.0167	-0.0307	-0.0074	-0.0361	-0.0092	0.0361	-0.0099	0.0378	-0.0058	-0.0084	0.0298	0.0011	0.0034	0.0028	-0.0013	0.0024	0.0087	-0.0005	0.0160	-0.0179	0.0100	0.0117
T25	Case	0.0139	0.0466	0.0044	0.0219	-0.0577	-0.0566	0.0121	-0.0541	0.0622	0.0291	0.0294	-0.0303	-0.0032	-0.0402	-0.0181	-0.0093	0.0579	-0.0323	0.0013	0.0269	0.0347	-0.0076	0.0039	0.0045	-0.0165	-0.0104	0.0097	0.0166	-0.0106	0.0220	0.0189	0.0364	0.0102	0.0053	-0.0073	0.0098	-0.0146	-0.0175	-0.0013	-0.0173	-0.0134	-0.0099	-0.0094	0.0014	0.0161	0.0158	0.0012	-0.0117
T21	Case	-0.0864	0.1325	0.0151	-0.0625	0.0272	-0.1105	-0.0260	-0.0150	-0.0154	-0.0635	-0.0419	0.0388	0.0069	0.0339	0.0054	0.0232	-0.0304	0.0041	0.0284	-0.0451	0.0122	-0.0160	0.0020	-0.0389	-0.0241	0.0420	0.0209	0.0106	0.0006	0.0047	-0.0256	0.0082	-0.0233	0.0020	-0.0217	0.0085	-0.0092	0.0065	0.0249	-0.0098	0.0090	0.0014	-0.0210	0.0064	-0.0073	-0.0127	0.0059	-0.0044
T22	Case	-0.0327	0.0819	-0.0631	-0.0018	-0.0086	-0.0060	-0.0047	-0.0383	-0.0134	-0.0710	-0.0069	-0.0351	0.0178	0.0164	-0.0292	0.0016	0.0406	0.0175	0.0523	-0.0013	-0.0367	0.0278	0.0013	0.0012	0.0339	-0.0176	0.0397	0.0284	-0.0157	0.0069	-0.0205	0.0049	-0.0220	-0.0108	-0.0111	0.0001	-0.0136	-0.0369	0.0089	-0.0017	0.0062	-0.0167	0.0160	0.0158	-0.0009	0.0042	0.0052	0.0156
T23	Case	-0.0331	0.0607	-0.0175	-0.0772	0.0488	0.0167	0.0244	-0.0367	-0.0198	-0.0120	-0.0120	0.0421	0.0087	0.0144	0.0078	-0.0150	-0.0009	-0.0340	-0.0062	0.0270	-0.0527	-0.0286	0.0128	0.0430	0.0132	-0.0163	0.0533	-0.0380	0.0089	-0.0145	-0.0153	-0.0071	0.0075	0.0072	0.0026	0.0180	-0.0019	-0.0071	-0.0262	-0.0336	0.0005	0.0031	0.0002	-0.0052	-0.0061	0.0012	0.0156	-0.0161
T24	Case	0.0745	0.0644	-0.0096	0.0363	-0.0161	-0.0588	-0.0152	0.0957	-0.0565	-0.0141	0.0050	-0.0287	0.0244	-0.0124	0.0041	-0.0628	-0.0362	-0.0465	0.0429	-0.0565	0.0056	-0.0031	-0.0048	0.0254	-0.0159	0.0234	-0.0235	0.0023	0.0038	0.0087	-0.0014	-0.0012	0.0006	0.0161	-0.0152	-0.0062	-0.0189	0.0203	-0.0316	-0.0038	0.0010	-0.0048	0.0144	0.0010	0.0081	0.0004	-0.0016	-0.0029
T26	Case	0.0513	0.0121	-0.0429	0.0549	-0.0563	-0.0493	0.0775	-0.0027	0.0646	0.0129	0.0449	0.0026	-0.0341	0.0398	0.0305	0.0058	-0.0364	0.0002	0.0448	-0.0111	-0.0331	-0.0019	0.0448	0.0259	-0.0094	0.0138	-0.0046	-0.0148	0.0114	0.0168	0.0056	0.0100	0.0014	-0.0071	0.0094	-0.0067	0.0046	-0.0127	-0.0118	0.0191	0.0389	-0.0150	-0.0355	0.0091	-0.0001	0.0091	-0.0132	0.0088
T33	Case	0.0812	-0.0152	-0.0385	0.0239	-0.0201	0.0170	-0.0237	-0.0468	-0.0018	0.0477	-0.0052	-0.0289	0.0370	-0.0116	-0.0111	-0.0146	-0.0075	0.0254	-0.0047	0.0317	0.0232	0.0342	-0.0148	0.0170	0.0089	0.0089	0.0020	-0.0357	-0.0235	0.0065	0.0301	0.0233	-0.0058	0.0035	-0.0046	0.0103	0.0059	0.0025	0.0123	-0.0020	-0.0046	-0.0229	-0.0248	0.0033	-0.0258	-0.0055	-0.0012	0.0009
T28	Case	0.0562	0.0605	0.0172	0.0001	-0.0345	-0.0248	0.0328	0.0004	0.0147	0.0263	0.0552	-0.0174	0.0009	0.0299	0.0195	0.0011	0.0043	0.0368	-0.0171	-0.0214	-0.0302	-0.0019	-0.0158	-0.0216	0.0121	0.0031	-0.0120	0.0214	-0.0141	-0.0041	-0.0139	-0.0318	-0.0091	-0.0331	0.0157	-0.0096	0.0130	0.0275	0.0045	-0.0187	0.0051	0.0153	0.0033	-0.0185	-0.0179	0.0054	0.0053	-0.0027
T29	Case	-0.0388	0.0328	-0.0562	-0.0827	-0.0244	-0.0276	0.0263	-0.0386	0.0179	-0.0178	-0.0001	-0.0701	-0.0291	0.0018	-0.0102	-0.0124	-0.0157	0.0007	-0.0490	0.0156	0.0269	-0.0570	0.0039	-0.0135	0.0105	-0.0456	-0.0345	0.0063	-0.0100	-0.0204	-0.0077	-0.0089	-0.0155	-0.0298	0.0049	0.0111	0.0001	-0.0024	-0.0052	0.0036	0.0111	-0.0114	0.0028	0.0035	0.0106	-0.0028	0.0021	0.0030
T30	Case	-0.0389	0.0407	-0.0407	-0.0787	-0.0346	0.0396	0.0263	-0.0218	0.0636	-0.0051	0.0031	-0.0663	0.0144	0.0220	0.0170	0.0262	-0.0235	0.0190	-0.0335	-0.0286	-0.0259	0.0013	0.0244	-0.0002	0.0052	-0.0196	-0.0198	0.0043	-0.0286	-0.0136	0.0108	-0.0032	0.0567	-0.0209	-0.0349	-0.0075	-0.0182	0.0041	-0.0244	0.0013	0.0021	0.0025	-0.0015	-0.0140	-0.0001	-0.0063	-0.0030	-0.0098
T31	Case	0.1026	0.0272	0.0276	-0.0208	0.0445	-0.0152	0.0323	-0.0263	0.0297	-0.0464	-0.0064	-0.0513	-0.0428	-0.0238	0.0343	0.0256	0.0026	0.0105	-0.0063	-0.0258	0.0233	-0.0232	-0.0022	0.0189	0.0159	0.0092	-0.0045	-0.0216	0.0370	0.0061	0.0029	-0.0022	-0.0058	0.0139	0.0280	-0.0119	0.0155	-0.0116	-0.0013	-0.0168	-0.0357	0.0151	0.0005	-0.0012	-0.0129	0.0023	-0.0005	0.0178
T32	Case	0.0605	0.0386	-0.0357	-0.0542	-0.0269	0.0236	-0.0362	0.0455	-0.0290	-0.0268	0.0286	-0.0257	0.0043	-0.0157	-0.0210	0.0303	-0.0179	0.0133	-0.0160	-0.0297	-0.0027	-0.0374	0.0469	-0.0259	-0.0075	-0.0182	-0.0139	-0.0275	-0.0181	0.0414	0.0162	0.0014	-0.0179	0.0081	-0.0091	0.0162	0.0208	-0.0070	0.0104	0.0077	-0.0069	0.0076	-0.0126	-0.0020	-0.0172	-0.0012	0.0071	-0.0005
T19	Case	-0.0176	0.1146	0.0079	-0.0563	0.0375	-0.0328	0.0268	0.0014	-0.0354	0.0325	-0.0092	0.0592	0.0302	-0.0691	0.0127	0.0554	-0.0069	-0.0024	0.0393	0.0308	0.0022	-0.0431	0.0145	0.0358	-0.0116	-0.0119	-0.0272	0.0078	-0.0161	0.0118	-0.0110	0.0149	0.0210	0.0114	0.0034	0.0336	-0.0063	0.0006	-0.0057	0.0039	-0.0004	0.0019	0.0234	-0.0017	0.0008	0.0002	-0.0015	-0.0086
T27	Case	0.0564	0.0929	0.0261	-0.0036	-0.0275	-0.0522	0.0529	0.0421	-0.0305	-0.0464	0.0256	-0.0037	-0.0101	-0.0383	0.0280	-0.0058	0.0499	0.0112	-0.0255	0.0169	-0.0251	-0.0226	0.0071	-0.0028	0.0421	0.0001	-0.0189	0.0212	-0.0054	0.0272	0.0238	-0.0087	-0.0050	0.0294	0.0050	-0.0156	0.0100	0.0080	0.0099	0.0188	-0.0069	-0.0010	0.0062	0.0024	-0.0022	-0.0133	-0.0031	-0.0228
T18	Case	0.0779	-0.0266	-0.0629	0.0001	-0.0132	-0.0108	0.0410	0.0163	-0.0377	0.0185	-0.0271	-0.0045	-0.0219	0.0320	-0.0233	0.0182	-0.0232	0.0253	0.0233	-0.0241	0.0058	0.0090	0.0098	0.0062	0.0014	-0.0246	0.0060	0.0170	0.0135	-0.0068	-0.0285	0.0023	-0.0099	0.0136	0.0042	-0.0129	-0.0085	0.0179	-0.0013	-0.0382	0.0014	0.0116	-0.0164	-0.0097	0.0089	0.0157	-0.0103	-0.0047
T02	Case	-0.1033	0.0698	-0.1022	0.1191	-0.0359	-0.0242	0.0495	-0.0156	-0.0330	0.0209	0.0163	0.0415	0.0488	0.0049	-0.0225	0.0304	-0.0488	-0.0080	-0.0840	0.0207	0.0066	-0.0028	0.0195	0.0317	-0.0366	0.0406	0.0233	0.0199	0.0197	-0.0029	0.0225	0.0137	-0.0297	-0.0304	-0.0013	-0.0192	-0.0013	-0.0046	-0.0101	0.0052	-0.0227	0.0111	-0.0013	-0.0066	0.0125	-0.0150	-0.0006	-0.0033
T16	Case	0.0012	0.0275	-0.0546	-0.0372	0.0116	0.0373	-0.0310	0.0984	0.0035	-0.0128	0.0552	-0.0179	-0.0052	-0.0119	0.0036	0.0048	0.0116	-0.0575	0.0305	0.0525	0.0267	0.0147	0.0073	-0.0183	-0.0147	-0.0012	-0.0060	0.0266	-0.0192	-0.0126	0.0042	-0.0078	-0.0284	-0.0146	0.0237	-0.0210	0.0092	-0.0169	0.0033	-0.0176	0.0045	-0.0039	-0.0068	-0.0052	-0.0079	0.0022	0.0234	-0.0166
T01	Case	-0.0293	0.0523	-0.0288	0.0710	-0.0129	0.0815	-0.0168	-0.0403	-0.0345	0.0017	0.0309	-0.0056	0.0502	0.0052	0.0175	-0.0615	-0.0295	0.0190	0.0456	0.0067	0.0146	-0.0329	-0.0087	0.0083	0.0114	0.0400	-0.0141	0.0123	-0.0167	-0.0144	0.0077	0.0030	0.0127	0.0070	-0.0056	0.0001	0.0201	-0.0184	-0.0101	-0.0002	0.0095	0.0004	0.0077	-0.0155	-0.0240	-0.0015	0.0249	0.0237
T34	Case	0.0512	-0.0554	-0.1112	-0.0013	-0.0338	-0.0253	0.0258	0.0016	0.0091	-0.0004	-0.0337	0.0395	-0.0073	-0.0115	-0.0036	-0.0247	-0.0066	0.0207	-0.0199	0.0361	0.0197	0.0291	-0.0145	0.0018	-0.0293	-0.0279	0.0279	0.0055	-0.0113	-0.0117	-0.0409	0.0100	0.0187	0.0040	-0.0117	0.0277	0.0005	0.0152	0.0140	0.0189	-0.0079	0.0080	-0.0001	-0.0151	-0.0201	0.0010	0.0058	0.0067
T03	Case	-0.1111	0.1067	0.0538	0.0576	-0.0531	0.0179	-0.0330	-0.0447	-0.0270	0.0284	-0.0208	0.0245	-0.0260	-0.0427	0.0501	0.0121	0.0056	-0.0303	0.0425	-0.0266	-0.0460	0.0199	-0.0477	-0.0047	-0.0265	-0.0360	-0.0099	-0.0071	-0.0056	0.0051	0.0116	-0.0352	0.0074	-0.0125	-0.0036	0.0077	0.0067	-0.0165	-0.0080	0.0084	-0.0111	0.0125	-0.0192	0.0143	-0.0051	-0.0144	-0.0165	0.0051
T04	Case	0.0756	0.0306	0.0441	0.0858	0.0443	0.0628	-0.0228	-0.0234	0.0308	-0.0032	-0.0949	-0.0027	-0.0326	-0.0180	-0.0057	-0.0291	0.0149	-0.0062	-0.0242	-0.0081	-0.0024	-0.0071	0.0090	0.0481	0.0385	0.0079	0.0103	0.0258	-0.0270	-0.0194	0.0055	-0.0047	-0.0439	-0.0029	-0.0000	0.0206	0.0066	0.0304	-0.0196	0.0149	0.0105	-0.0023	-0.0164	0.0189	-0.0001	0.0215	0.0038	-0.0168
T05	Case	-0.1944	0.1232	0.0515	0.0112	0.0230	0.0015	0.0031	0.1205	0.0487	0.0654	-0.0850	0.0214	-0.0360	0.0043	0.0049	-0.0298	-0.0537	0.0580	-0.0055	0.0338	0.0565	0.0044	0.0315	-0.0072	0.0398	-0.0041	0.0037	-0.0201	-0.0197	0.0232	-0.0043	-0.0125	0.0147	-0.0045	0.0034	-0.0124	0.0042	0.0001	0.0058	-0.0118	-0.0045	-0.0112	0.0055	0.0122	0.0091	0.0014	0.0024	0.0137
T06	Case	-0.1695	0.1208	-0.0149	0.1160	-0.0190	0.0404	-0.0490	-0.0025	0.0485	-0.0523	0.0587	-0.0170	0.0043	-0.0017	-0.0648	-0.0157	0.0395	0.0335	0.0187	-0.0101	0.0240	0.0021	-0.0119	0.0126	-0.0178	-0.0017	-0.0092	-0.0105	0.0104	-0.0319	-0.0135	-0.0074	0.0300	0.0304	0.0441	-0.0029	-0.0179	0.0150	0.0041	0.0080	0.0014	0.0147	-0.0167	-0.0049	0.0048	-0.0050	0.0021	-0.0109
T07	Case	-0.0552	0.0492	-0.0077	0.0754	0.0032	0.1000	-0.0518	-0.0252	-0.0304	-0.0031	-0.0910	-0.0180	-0.0205	0.0447	0.0530	0.0001	0.0182	-0.0014	-0.0073	0.0043	-0.0157	-0.0085	0.0310	-0.0560	0.0105	-0.0175	0.0043	0.0330	0.0435	-0.0108	0.0122	0.0220	-0.0030	0.0055	-0.0060	-0.0053	0.0024	-0.0139	-0.0010	0.0100	0.0004	0.0032	0.0134	-0.0100	0.0029	-0.0041	-0.0116	-0.0119
T08	Case	0.0026	0.0359	-0.0306	0.0635	-0.0187	0.0817	-0.0438	0.0534	0.0013	-0.0734	-0.0137	-0.0637	0.0134	-0.0405	0.0540	0.0027	-0.0140	-0.0421	-0.0346	-0.0119	0.0192	-0.0067	-0.0334	0.0211	-0.0306	-0.0066	0.0389	-0.0501	0.0108	0.0276	-0.0040	-0.0054	0.0044	-0.0238	-0.0052	-0.0038	-0.0123	0.0093	0.0276	-0.0072	0.0206	-0.0017	0.0213	-0.0037	-0.0001	0.0175	-0.0115	-0.0005
T09	Case	0.0757	0.0042	-0.0110	0.0112	0.0173	0.0729	-0.0177	-0.1022	0.0181	-0.0203	0.0260	0.0304	0.0094	-0.0070	-0.0473	0.0111	-0.0112	-0.0240	-0.0096	-0.0001	0.0236	-0.0029	-0.0172	-0.0070	0.0119	0.0110	-0.0132	-0.0184	0.0006	0.0211	-0.0261	-0.0457	-0.0009	-0.0071	-0.0326	-0.0151	0.0033	0.0166	-0.0016	-0.0122	-0.0194	-0.0207	-0.0060	0.0198	0.0107	-0.0198	-0.0017	-0.0013
T10	Case	0.1008	-0.0353	-0.0903	0.0331	0.0178	-0.0130	0.0179	0.0180	0.0142	-0.0264	0.0041	0.0503	-0.0259	-0.0292	-0.0073	-0.0297	-0.0196	-0.0153	0.0179	0.0163	0.0047	0.0422	0.0275	0.0131	0.0340	-0.0128	-0.0050	0.0213	0.0260	-0.0036	0.0048	-0.0261	0.0120	-0.0058	-0.0150	-0.0135	-0.0161	-0.0197	0.0080	0.0045	-0.0012	0.0030	0.0106	-0.0107	-0.0243	-0.0004	-0.0196	-0.0075
T11	Case	0.0460	0.0397	-0.0242	-0.0175	0.1206	0.0919	-0.0025	-0.0051	0.0279	-0.0224	0.0225	0.0654	-0.0300	0.0260	-0.0333	0.0371	-0.0061	-0.0298	-0.0152	-0.0299	-0.0054	-0.0295	0.0099	-0.0155	0.0083	0.0137	0.0035	0.0025	0.0057	0.0061	0.0349	0.0357	0.0170	0.0092	0.0108	0.0112	-0.0060	0.0122	0.0155	-0.0043	0.0071	-0.0168	-0.0030	-0.0087	0.0033	-0.0055	-0.0137	0.0133
T12	Case	0.0581	0.1047	0.0271	-0.0215	0.0017	0.0102	0.0075	0.0437	0.0140	0.0497	0.0204	0.0258	-0.0189	-0.0010	-0.0293	0.0335	0.0025	-0.0466	-0.0041	-0.0129	-0.0050	0.0392	-0.0420	-0.0180	0.0038	-0.0223	-0.0005	0.0008	0.0052	-0.0205	-0.0093	0.0082	0.0072	-0.0044	0.0009	-0.0157	-0.0022	0.0057	0.0127	0.0032	-0.0088	-0.0323	-0.0055	-0.0039	-0.0145	0.0076	0.0009	-0.0092
T13	Case	0.0372	0.0629	0.0066	-0.0522	0.0043	-0.0271	-0.0279	-0.0269	-0.0311	-0.0346	0.0454	0.0167	0.0012	0.0305	0.0101	-0.0324	-0.0059	0.0076	0.0127	0.0451	0.0229	0.0256	-0.0377	-0.0340	0.0274	-0.0102	0.0121	0.0094	0.0544	0.0320	0.0170	0.0097	0.0285	-0.0107	-0.0233	-0.0022	0.0161	0.0220	-0.0161	0.0180	0.0001	0.0132	-0.0129	0.0113	0.0241	0.0200	0.0270	0.0015
T14	Case	0.0054	0.0340	-0.0306	-0.0687	0.0784	0.0327	-0.0059	0.0053	-0.0020	0.0193	0.0052	0.0045	0.0115	-0.0094	-0.0280	0.0433	-0.0326	-0.0158	-0.0037	0.0131	-0.0075	0.0701	-0.0063	0.0044	-0.0228	-0.0032	-0.0225	0.0112	-0.0219	0.0007	0.0193	-0.0370	-0.0260	0.0078	0.0134	0.0124	-0.0028	-0.0022	-0.0119	0.0159	0.0054	0.0189	0.0121	0.0103	0.0144	0.0017	-0.0004	0.0178
T15	Case	0.1028	0.0292	0.0049	-0.0409	0.0823	0.0486	0.0009	-0.0207	0.0016	0.0176	0.0057	0.0585	-0.0056	0.0202	-0.0243	-0.0244	0.0010	0.0321	-0.0069	0.0206	-0.0017	0.0031	0.0182	0.0053	-0.0210	-0.0267	0.0026	-0.0031	-0.0005	-0.0001	0.0090	-0.0015	0.0099	0.0185	0.0042	-0.0377	0.0014	-0.0054	0.0041	-0.0084	0.0242	0.0175	0.0039	0.0168	-0.0056	-0.0134	-0.0056	-0.0039
T17	Case	0.0074	0.0770	0.0227	0.0288	-0.0142	0.0074	0.0183	-0.0557	-0.0122	0.0485	0.0369	-0.0186	0.0402	-0.0278	-0.0019	-0.0011	-0.0165	-0.0347	-0.0215	0.0067	-0.0153	-0.0002	0.0241	-0.0300	0.0180	-0.0029	0.0136	0.0277	-0.0103	0.0158	-0.0466	0.0126	0.0009	0.0171	0.0162	-0.0007	0.0119	0.0155	0.0058	0.0138	-0.0113	0.0097	0.0062	-0.0050	0.0005	0.0304	-0.0255	0.0260
T35	Case	0.0474	-0.0142	-0.0649	-0.0202	-0.0156	0.0090	0.0322	0.0189	-0.0353	0.0245	-0.0340	-0.0074	0.0370	-0.0081	0.0126	0.0295	0.0278	0.0152	0.0362	-0.0060	0.0246	-0.0017	-0.0307	0.0072	0.0129	0.0351	-0.0277	0.0310	0.0165	-0.0288	0.0164	-0.0169	0.0152	-0.0076	0.0021	0.0211	0.0148	0.0069	0.0198	-0.0140	0.0144	-0.0295	0.0059	-0.0088	0.0268	-0.0043	-0.0151	0.0042
[truncated: 19 more columns]
