# Supplementary material for: Characterization of gut microbiota in adults with coronary atherosclerosis
Source: PeerJ journal article supplement (doi:10.7717/peerj.15245), 2023-05-18
Supplement: Raw_Data.zip [file Figure2A_PCoA_explained.xls]

	Proportion of explained(%)
PC1	11.6427
PC2	9.6120
PC3	6.5472
PC4	6.2785
PC5	5.5275
PC6	4.3336
PC7	3.9863
PC8	3.7856
PC9	3.4532
PC10	3.0143
PC11	2.8624
PC12	2.5649
PC13	2.3218
PC14	2.2187
PC15	2.1198
PC16	1.9499
PC17	1.8550
PC18	1.7633
PC19	1.7108
PC20	1.5095
PC21	1.4164
PC22	1.3926
PC23	1.3289
PC24	1.1774
PC25	1.1484
PC26	1.0548
PC27	1.0006
PC28	0.8942
PC29	0.8474
PC30	0.7564
PC31	0.6839
PC32	0.6715
PC33	0.6051
PC34	0.5540
PC35	0.5275
PC36	0.5052
PC37	0.4651
PC38	0.4240
PC39	0.4150
PC40	0.4023
PC41	0.3668
PC42	0.3609
PC43	0.3470
PC44	0.3379
PC45	0.3159
PC46	0.3043
PC47	0.2914
PC48	0.2480
PC49	0.2449
PC50	0.2447
PC51	0.2138
PC52	0.1947
PC53	0.1852
PC54	0.1599
PC55	0.1552
PC56	0.1258
PC57	0.1103
PC58	0.1093
PC59	0.1041
PC60	0.0711
PC61	0.0703
PC62	0.0366
PC63	0.0339
PC64	0.0211
PC65	0.0130
PC66	0.0058
PC67	0.0000
