# Supplementary material for: Characterization of gut microbiota in adults with coronary atherosclerosis
Source: PeerJ journal article supplement (doi:10.7717/peerj.15245), 2023-05-18
Supplement: Raw_Data.zip [file Figure2B_unweighted_unifrac_distance_matrix.xls]

samples	C01	C10	C11	C12	C13	C14	C15	C16	C17	C18	C19	C02	C20	C21	C22	C23	C24	C25	C26	C27	C28	C29	C03	C30	C31	C32	C04	C05	C06	C07	C08	C09	T01	T10	T11	T12	T13	T14	T15	T16	T17	T18	T19	T02	T20	T21	T22	T23	T24
C01	0.0	0.328911297686	0.339876184642	0.342650318294	0.246747897044	0.290021089676	0.305496759612	0.286579260516	0.211805345451	0.257832342862	0.30183446491	0.18693207002	0.337404440673	0.283820827355	0.271670772451	0.345906855655	0.374483907431	0.288780785122	0.30112967496	0.295100346249	0.245846534154	0.252650750821	0.302803751386	0.36487288806	0.285744458143	0.29136858443	0.200223772473	0.299980686537	0.256152546188	0.38352093351	0.301612182427	0.32347500996	0.288815080152	0.226945663889	0.279978364909	0.257995764103	0.225335633978	0.266349130282	0.211823323305	0.28115874379	0.238613884537	0.229780553561	0.305594760943	0.385498887089	0.271641257728	0.336912623535	0.289900783408	0.276147007073	0.257724045289
C10	0.328911297686	0.0	0.263524162753	0.247750702484	0.286633922253	0.297625840486	0.296853733226	0.2493950232	0.340853247864	0.299692583534	0.270734590536	0.316711594901	0.302349768138	0.274980730389	0.314621053264	0.305577398748	0.31444585791	0.307099377621	0.28838721632	0.338401872333	0.322941529015	0.349568555321	0.258255588591	0.257079178368	0.303595881758	0.299574599209	0.271665511709	0.310709511553	0.265343176851	0.278916257184	0.264045070919	0.312135729964	0.292479602803	0.307206562419	0.33290341165	0.337708633908	0.267063831239	0.274827160471	0.314897988519	0.302955217295	0.299099338228	0.265598206079	0.308939032519	0.334048833988	0.256680130351	0.303757257164	0.283755953891	0.267174787262	0.334219039478
C11	0.339876184642	0.263524162753	0.0	0.258790469126	0.305979874903	0.349931462715	0.374431204972	0.30852374715	0.385282900377	0.339751502118	0.311865803136	0.349533816986	0.331332839373	0.320100563245	0.356667497233	0.343874160467	0.338090000639	0.334109146201	0.290054943529	0.304592628153	0.336218226313	0.35411895051	0.341386358134	0.315385901521	0.304108998835	0.351444933175	0.340817277406	0.344659726326	0.314711211972	0.32769086419	0.242186156894	0.307676858965	0.300002821916	0.356397191736	0.324414467653	0.363605916963	0.308167849247	0.264676196115	0.319931703381	0.322025598193	0.311250973626	0.336389643812	0.333900415598	0.358207158773	0.313241625538	0.354567296026	0.323113135711	0.294416780556	0.371176059796
C12	0.342650318294	0.247750702484	0.258790469126	0.0	0.323348148345	0.268683760192	0.293643586565	0.288598293583	0.354471854023	0.313548021373	0.290969784927	0.351719787565	0.332639072214	0.292462429389	0.333436758104	0.302977720488	0.324529485282	0.335874094481	0.283677986571	0.330395606828	0.34751567647	0.339708040666	0.27314754352	0.298697610125	0.346571585694	0.336006514383	0.30044746122	0.334469207532	0.294476513667	0.243329531358	0.262483433127	0.302240975766	0.322826026698	0.301783235474	0.334440889979	0.3736367579	0.349965945183	0.294905080642	0.347774394875	0.29306668636	0.317693973888	0.31255660954	0.346405530266	0.354297873212	0.300522791428	0.368049706059	0.32470816763	0.312659037399	0.371491028673
C13	0.246747897044	0.286633922253	0.305979874903	0.323348148345	0.0	0.237922330957	0.284252208379	0.216418969057	0.252697143561	0.233103054907	0.240893675645	0.240185968847	0.358065643357	0.240053781116	0.248574242356	0.31557225653	0.370853146564	0.276804425654	0.278681924403	0.295156324644	0.299177706302	0.220798051203	0.32393389961	0.343331917453	0.240347770921	0.305363844034	0.226296106707	0.245226635668	0.237540372276	0.298662992263	0.229730011843	0.288193052929	0.253183386323	0.217155853891	0.273795131271	0.268742760343	0.248812382645	0.25512330651	0.215001723188	0.229902647432	0.264249195017	0.180261672734	0.314327862181	0.355251766892	0.246048740695	0.35660973524	0.25829225245	0.294708054381	0.2176877472
C14	0.290021089676	0.297625840486	0.349931462715	0.268683760192	0.237922330957	0.0	0.22899218853	0.215414064658	0.269310547287	0.206925392621	0.22409215805	0.278044676928	0.329169146199	0.216756084319	0.235299462442	0.286602789263	0.329646436819	0.279548679086	0.29088644767	0.298634719748	0.299244906108	0.284234201426	0.301603249567	0.318303140232	0.271722751193	0.291474999893	0.258208615908	0.315135779745	0.261432688047	0.301328313417	0.338334718759	0.328913833597	0.27930057226	0.256995269914	0.327209260733	0.309352825779	0.290865446162	0.297446334513	0.306240316993	0.295102625106	0.267717039108	0.242370302745	0.350163481651	0.358662169944	0.281072524759	0.374963706889	0.301467248361	0.3278975806	0.315256541578
C15	0.305496759612	0.296853733226	0.374431204972	0.293643586565	0.284252208379	0.22899218853	0.0	0.242086778218	0.323579619882	0.275166537707	0.282458682596	0.288789620887	0.324829892407	0.256481857608	0.309718257878	0.307143237533	0.337036246167	0.322708546733	0.32045567228	0.324508332694	0.337564636069	0.323956149883	0.286642641757	0.325520233746	0.294797873752	0.28758754029	0.292791526163	0.297045000078	0.319512680177	0.22230872305	0.349360581194	0.339554029298	0.312185293118	0.247899031919	0.338319826664	0.329804648702	0.308225013764	0.313770872704	0.328572064207	0.274105045038	0.314219679311	0.244521833842	0.351319586972	0.314362192644	0.280684417626	0.376682251848	0.308421475022	0.317716678541	0.328572422482
C16	0.286579260516	0.2493950232	0.30852374715	0.288598293583	0.216418969057	0.215414064658	0.242086778218	0.0	0.251145786234	0.223154872842	0.220152705104	0.268855308044	0.294765774213	0.219840045172	0.26344120677	0.298119142283	0.314796561634	0.290118674808	0.277496028832	0.28529030787	0.320822486689	0.277170809205	0.287740811914	0.295780414038	0.240286654124	0.281020998543	0.256756123915	0.268659105677	0.260959357542	0.30437963358	0.266400155449	0.278388747554	0.262115927567	0.255035537998	0.307744445825	0.275872597941	0.27499471154	0.26797255637	0.28132349526	0.261424197069	0.265594074534	0.221042701412	0.276677427745	0.313894717356	0.238039375366	0.345850324383	0.302336585346	0.281472043406	0.267255476248
C17	0.211805345451	0.340853247864	0.385282900377	0.354471854023	0.252697143561	0.269310547287	0.323579619882	0.251145786234	0.0	0.26024911085	0.296714649971	0.251897819083	0.322800159692	0.268593501069	0.257810681331	0.366357040139	0.375206815265	0.279266845646	0.319135488674	0.332919758381	0.28663015281	0.259238121561	0.334436106782	0.383953786906	0.289859525952	0.329372595979	0.221951229481	0.323446364941	0.315432257893	0.375558648701	0.336524445517	0.276491201588	0.319414298253	0.264890400684	0.274379639101	0.242998088193	0.261288367449	0.268392005854	0.229894355569	0.272110921506	0.279743022668	0.273848235657	0.31123767514	0.409718017931	0.267638237924	0.356205407627	0.321158896914	0.3021412234	0.281529640911
C18	0.257832342862	0.299692583534	0.339751502118	0.313548021373	0.233103054907	0.206925392621	0.275166537707	0.223154872842	0.26024911085	0.0	0.2052955097	0.245960227551	0.303201194432	0.233088498788	0.284802980373	0.354836963501	0.373875891514	0.300456793153	0.295915627861	0.295180367171	0.292845540695	0.297102137441	0.334319121992	0.337932009279	0.310670853993	0.293317278893	0.253673543027	0.308911753313	0.25699932957	0.342071836986	0.304408399402	0.337637475674	0.298196525794	0.257424283554	0.314027579382	0.297894402516	0.255183539571	0.285230712799	0.261645459444	0.295089971828	0.272833968825	0.25409546066	0.301953167445	0.382331559478	0.268453306609	0.333912579247	0.309272454292	0.298488069858	0.295110999263
C19	0.30183446491	0.270734590536	0.311865803136	0.290969784927	0.240893675645	0.22409215805	0.282458682596	0.220152705104	0.296714649971	0.2052955097	0.0	0.28824397861	0.264499079549	0.224255863318	0.304297590944	0.327374069191	0.347892518105	0.291532093102	0.231330476206	0.305914433012	0.311939610247	0.3035461382	0.288173021959	0.277642618506	0.3078320894	0.306938144259	0.27069618516	0.293488013095	0.28483753266	0.312765594585	0.286768851783	0.316095015101	0.315508024498	0.28350591418	0.291063217029	0.295652644815	0.247962572507	0.250400933257	0.292857996555	0.274829014433	0.290524357067	0.2780246149	0.308283245078	0.353197904532	0.242366804281	0.277570934278	0.276841859686	0.274289901335	0.3105445993
C02	0.18693207002	0.316711594901	0.349533816986	0.351719787565	0.240185968847	0.278044676928	0.288789620887	0.268855308044	0.251897819083	0.245960227551	0.28824397861	0.0	0.340270203375	0.272667550555	0.236819299697	0.354663972828	0.354218150654	0.275386193927	0.310082672881	0.286287892586	0.291815574777	0.256263313589	0.280322268472	0.342924030838	0.292813869561	0.28416069088	0.231443658296	0.276195911437	0.277568907236	0.342614830586	0.32380358979	0.343402432708	0.279658328878	0.207701770619	0.258342313372	0.228211092195	0.205978909292	0.226871317521	0.205540391906	0.246325118893	0.263768742955	0.174164533804	0.278915019464	0.360322558297	0.233431965878	0.296934756824	0.251847047932	0.264872708937	0.260239405368
C20	0.337404440673	0.302349768138	0.331332839373	0.332639072214	0.358065643357	0.329169146199	0.324829892407	0.294765774213	0.322800159692	0.303201194432	0.264499079549	0.340270203375	0.0	0.28456985476	0.336963479775	0.348454679021	0.318259556493	0.339801256641	0.296493408938	0.341256322419	0.330809471366	0.342579287468	0.314753803388	0.305185316144	0.332642962288	0.32079688631	0.3219262433	0.360001958574	0.363690544819	0.358995680452	0.355250089097	0.383374106739	0.332173113997	0.380652132726	0.363278351412	0.338874934291	0.295133016359	0.320035190843	0.337784165592	0.326352344489	0.322855189392	0.364720847928	0.334971684658	0.381772179264	0.303610941164	0.283327618009	0.310408727698	0.299751276622	0.376076382061
C21	0.283820827355	0.274980730389	0.320100563245	0.292462429389	0.240053781116	0.216756084319	0.256481857608	0.219840045172	0.268593501069	0.233088498788	0.224255863318	0.272667550555	0.28456985476	0.0	0.28143397745	0.312904299877	0.304904082907	0.270018570551	0.26942436694	0.290686993952	0.315327707933	0.295157180179	0.29507276449	0.303503627707	0.263525828415	0.294986976839	0.219469670184	0.303091028005	0.290176358866	0.334623280942	0.288775077242	0.316447265708	0.285128208742	0.281285475731	0.319025156869	0.289977270235	0.278135774987	0.262020364416	0.280526613075	0.234704598338	0.268589695756	0.254988737649	0.319710667759	0.36553855858	0.257993783398	0.342117775161	0.305677330151	0.282059591234	0.269651784449
C22	0.271670772451	0.314621053264	0.356667497233	0.333436758104	0.248574242356	0.235299462442	0.309718257878	0.26344120677	0.257810681331	0.284802980373	0.304297590944	0.236819299697	0.336963479775	0.28143397745	0.0	0.322440799274	0.353012684463	0.236593883861	0.258351253861	0.297529901686	0.248804440384	0.231699358598	0.321088967354	0.333638576889	0.240350700083	0.296728066886	0.265394724625	0.294520238327	0.218358387138	0.354037635289	0.312965288264	0.303434288441	0.280028567908	0.278960737384	0.321816263718	0.257177453257	0.282879819914	0.284423478129	0.260794025626	0.321016223329	0.214013521219	0.214544933408	0.291799707458	0.321533020069	0.265040153009	0.347561398366	0.279626711401	0.297508515944	0.292107814753
C23	0.345906855655	0.305577398748	0.343874160467	0.302977720488	0.31557225653	0.286602789263	0.307143237533	0.298119142283	0.366357040139	0.354836963501	0.327374069191	0.354663972828	0.348454679021	0.312904299877	0.322440799274	0.0	0.28338973378	0.295608185161	0.309527083373	0.331121063966	0.293217080962	0.305887289795	0.339890825005	0.337226108687	0.326708645054	0.290399988857	0.329584753869	0.365698359224	0.327718775979	0.337498427734	0.342879206657	0.346282300448	0.353958221911	0.331797944958	0.372062753145	0.376210217126	0.360744134457	0.346264855384	0.364805293134	0.363504898041	0.346161384228	0.303302976352	0.397666204174	0.389452186942	0.336544970264	0.399896124686	0.35477748266	0.350943288964	0.361345199472
C24	0.374483907431	0.31444585791	0.338090000639	0.324529485282	0.370853146564	0.329646436819	0.337036246167	0.314796561634	0.375206815265	0.373875891514	0.347892518105	0.354218150654	0.318259556493	0.304904082907	0.353012684463	0.28338973378	0.0	0.325968630901	0.337325244311	0.302391155627	0.338092830604	0.361202758266	0.282327023421	0.327659104022	0.339640993384	0.294473374535	0.331354159927	0.368529134936	0.38675283534	0.355809700316	0.362320263496	0.387010978395	0.334769784796	0.374870518247	0.363713298502	0.361103979943	0.350836182663	0.333092928061	0.363068974676	0.318139227525	0.330540735757	0.348018969213	0.347053726457	0.397776417261	0.351716702396	0.395362984233	0.343679178604	0.316617451016	0.39996617205
C25	0.288780785122	0.307099377621	0.334109146201	0.335874094481	0.276804425654	0.279548679086	0.322708546733	0.290118674808	0.279266845646	0.300456793153	0.291532093102	0.275386193927	0.339801256641	0.270018570551	0.236593883861	0.295608185161	0.325968630901	0.0	0.278710520572	0.274661668894	0.262779015745	0.275014189317	0.332156026756	0.323944511222	0.299746286938	0.261228477324	0.280661110496	0.305715173164	0.332518956622	0.372874080215	0.326445899161	0.326301232054	0.292913436906	0.333841704506	0.321266620598	0.297580021113	0.274259623139	0.289196711936	0.281893876875	0.279522534152	0.286922803819	0.261374076176	0.323227995842	0.398202348263	0.275506958399	0.352897104664	0.298167357593	0.284485331127	0.318859729262
C26	0.30112967496	0.28838721632	0.290054943529	0.283677986571	0.278681924403	0.29088644767	0.32045567228	0.277496028832	0.319135488674	0.295915627861	0.231330476206	0.310082672881	0.296493408938	0.26942436694	0.258351253861	0.309527083373	0.337325244311	0.278710520572	0.0	0.29794831984	0.227126267518	0.251565844863	0.30304170936	0.305159068337	0.266820096532	0.315115104846	0.281686049944	0.314250781012	0.263261716326	0.342793785274	0.272572963732	0.2843535791	0.324349341658	0.299554831017	0.350092569468	0.27372112619	0.246453958841	0.28884129001	0.31953865015	0.291639999976	0.249631188495	0.294754367585	0.288119415292	0.340752307276	0.254653403494	0.279849436013	0.279255587775	0.270381403669	0.281520690409
C27	0.295100346249	0.338401872333	0.304592628153	0.330395606828	0.295156324644	0.298634719748	0.324508332694	0.28529030787	0.332919758381	0.295180367171	0.305914433012	0.286287892586	0.341256322419	0.290686993952	0.297529901686	0.331121063966	0.302391155627	0.274661668894	0.29794831984	0.0	0.278100159825	0.319239321062	0.304259992989	0.317147782254	0.286597733135	0.297663910429	0.283281120551	0.335152771482	0.333045000159	0.358715915419	0.309491685763	0.342860358095	0.316550288912	0.326061046805	0.296228458263	0.265878286523	0.304123661648	0.271025568717	0.284216010763	0.284065999126	0.275550851963	0.281953403793	0.316478941049	0.408696267594	0.314694730167	0.376530436391	0.336250099103	0.3078593202	0.338648328731
C28	0.245846534154	0.322941529015	0.336218226313	0.34751567647	0.299177706302	0.299244906108	0.337564636069	0.320822486689	0.28663015281	0.292845540695	0.311939610247	0.291815574777	0.330809471366	0.315327707933	0.248804440384	0.293217080962	0.338092830604	0.262779015745	0.227126267518	0.278100159825	0.0	0.249933372321	0.344626963851	0.363770650897	0.282300570225	0.30793544738	0.256212310205	0.321984828492	0.269982065679	0.378449324058	0.338977180989	0.325311256231	0.293679347672	0.301452106776	0.302237345152	0.268093133309	0.271541179502	0.292937933369	0.252251807747	0.330703936071	0.271258423754	0.284844765207	0.299925052804	0.374992814819	0.290480271197	0.313962041695	0.320156565143	0.277577955528	0.288595730052
C29	0.252650750821	0.349568555321	0.35411895051	0.339708040666	0.220798051203	0.284234201426	0.323956149883	0.277170809205	0.259238121561	0.297102137441	0.3035461382	0.256263313589	0.342579287468	0.295157180179	0.231699358598	0.305887289795	0.361202758266	0.275014189317	0.251565844863	0.319239321062	0.249933372321	0.0	0.36724078671	0.38227761487	0.250445749238	0.270812124818	0.304511676014	0.309918857802	0.252171730323	0.368150669348	0.30765179884	0.314837275533	0.30984944065	0.270903156464	0.30300104097	0.247894877229	0.274962935156	0.293900896636	0.282268024902	0.27698734878	0.266233214884	0.254211854735	0.30255197938	0.35796321363	0.285282750549	0.338352025624	0.307445478326	0.319401745512	0.260610715894
C03	0.302803751386	0.258255588591	0.341386358134	0.27314754352	0.32393389961	0.301603249567	0.286642641757	0.287740811914	0.334436106782	0.334319121992	0.288173021959	0.280322268472	0.314753803388	0.29507276449	0.321088967354	0.339890825005	0.282327023421	0.332156026756	0.30304170936	0.304259992989	0.344626963851	0.36724078671	0.0	0.309298313581	0.329795961558	0.337819042229	0.246934277502	0.253634040393	0.327820909533	0.297924830986	0.32083186381	0.339741565745	0.307712616785	0.300256631431	0.31688921062	0.299903515253	0.308778367144	0.23933572673	0.30571466011	0.279996080194	0.28578914593	0.277773112628	0.287671408072	0.331362147469	0.25692784786	0.306537795666	0.26492602177	0.245600865006	0.332031555015
C30	0.36487288806	0.257079178368	0.315385901521	0.298697610125	0.343331917453	0.318303140232	0.325520233746	0.295780414038	0.383953786906	0.337932009279	0.277642618506	0.342924030838	0.305185316144	0.303503627707	0.333638576889	0.337226108687	0.327659104022	0.323944511222	0.305159068337	0.317147782254	0.363770650897	0.38227761487	0.309298313581	0.0	0.300265906479	0.303811325582	0.312947589407	0.321126996961	0.338800120698	0.303599267475	0.302560487141	0.384668518694	0.32846791558	0.355820584081	0.353907915357	0.34296457611	0.333502052134	0.30446891325	0.359885230381	0.313519850468	0.303002183818	0.31338816468	0.345710623273	0.353666145366	0.283558081877	0.349519725137	0.338174544319	0.312114113466	0.372026940776
C31	0.285744458143	0.303595881758	0.304108998835	0.346571585694	0.240347770921	0.271722751193	0.294797873752	0.240286654124	0.289859525952	0.310670853993	0.3078320894	0.292813869561	0.332642962288	0.263525828415	0.240350700083	0.326708645054	0.339640993384	0.299746286938	0.266820096532	0.286597733135	0.282300570225	0.250445749238	0.329795961558	0.300265906479	0.0	0.24651675131	0.28183343816	0.29747325389	0.274558630702	0.313457800442	0.290231019873	0.301436643579	0.247885311057	0.281847551936	0.309538419945	0.251773627685	0.268609272801	0.304151382541	0.288000836127	0.297861631544	0.206906217776	0.240606850503	0.317843593985	0.291269084709	0.264025572064	0.353656025102	0.307340867244	0.288344510873	0.272318045115
C32	0.29136858443	0.299574599209	0.351444933175	0.336006514383	0.305363844034	0.291474999893	0.28758754029	0.281020998543	0.329372595979	0.293317278893	0.306938144259	0.28416069088	0.32079688631	0.294986976839	0.296728066886	0.290399988857	0.294473374535	0.261228477324	0.315115104846	0.297663910429	0.30793544738	0.270812124818	0.337819042229	0.303811325582	0.24651675131	0.0	0.318938438577	0.339172323725	0.324922077669	0.345412739735	0.349638041947	0.38686342076	0.297370884872	0.331145218443	0.346632806212	0.316662463215	0.284253438725	0.316159875779	0.314111835276	0.297133814968	0.299109349957	0.289482247261	0.319308674137	0.372339304044	0.296349049873	0.354950258471	0.327563080335	0.287131673143	0.349407958003
C04	0.200223772473	0.271665511709	0.340817277406	0.30044746122	0.226296106707	0.258208615908	0.292791526163	0.256756123915	0.221951229481	0.253673543027	0.27069618516	0.231443658296	0.3219262433	0.219469670184	0.265394724625	0.329584753869	0.331354159927	0.280661110496	0.281686049944	0.283281120551	0.256212310205	0.304511676014	0.246934277502	0.312947589407	0.28183343816	0.318938438577	0.0	0.253667436385	0.25624119874	0.307296265016	0.272417413724	0.289026060434	0.253066354389	0.226810544551	0.258957172918	0.245870968346	0.21951576698	0.235101466969	0.206943476498	0.235119061264	0.231372825121	0.221669636034	0.285050943333	0.35514561435	0.238106778214	0.328504737754	0.293656096795	0.2295631702	0.253178103114
C05	0.299980686537	0.310709511553	0.344659726326	0.334469207532	0.245226635668	0.315135779745	0.297045000078	0.268659105677	0.323446364941	0.308911753313	0.293488013095	0.276195911437	0.360001958574	0.303091028005	0.294520238327	0.365698359224	0.368529134936	0.305715173164	0.314250781012	0.335152771482	0.321984828492	0.309918857802	0.253634040393	0.321126996961	0.29747325389	0.339172323725	0.253667436385	0.0	0.317540200226	0.330311595042	0.295295147069	0.377433825814	0.302566281124	0.283658461287	0.296209559066	0.264351823372	0.271253676786	0.254908424821	0.257587415626	0.27409629592	0.284209302698	0.230788053141	0.283775019916	0.330755389254	0.253007318933	0.307854106064	0.265193638388	0.26218815694	0.282722498028
C06	0.256152546188	0.265343176851	0.314711211972	0.294476513667	0.237540372276	0.261432688047	0.319512680177	0.260959357542	0.315432257893	0.25699932957	0.28483753266	0.277568907236	0.363690544819	0.290176358866	0.218358387138	0.327718775979	0.38675283534	0.332518956622	0.263261716326	0.333045000159	0.269982065679	0.252171730323	0.327820909533	0.338800120698	0.274558630702	0.324922077669	0.25624119874	0.317540200226	0.0	0.316965121008	0.238553436262	0.251500192471	0.281513176152	0.252821496246	0.303932880929	0.299214513914	0.285244588366	0.289259475482	0.267614172093	0.326757305058	0.235949013604	0.241188958731	0.300317800675	0.335069820215	0.297850658454	0.329669119529	0.288908254627	0.312992272501	0.291653238624
C07	0.38352093351	0.278916257184	0.32769086419	0.243329531358	0.298662992263	0.301328313417	0.22230872305	0.30437963358	0.375558648701	0.342071836986	0.312765594585	0.342614830586	0.358995680452	0.334623280942	0.354037635289	0.337498427734	0.355809700316	0.372874080215	0.342793785274	0.358715915419	0.378449324058	0.368150669348	0.297924830986	0.303599267475	0.313457800442	0.345412739735	0.307296265016	0.330311595042	0.316965121008	0.0	0.297752838436	0.32218860025	0.305540500041	0.269084830074	0.320025812027	0.372871663761	0.34104125818	0.329386619215	0.354199679179	0.302085073087	0.356434942939	0.283127383601	0.371884005626	0.324536419106	0.307077734242	0.370538308374	0.298376230803	0.323597498611	0.360660609872
C08	0.301612182427	0.264045070919	0.242186156894	0.262483433127	0.229730011843	0.338334718759	0.349360581194	0.266400155449	0.336524445517	0.304408399402	0.286768851783	0.32380358979	0.355250089097	0.288775077242	0.312965288264	0.342879206657	0.362320263496	0.326445899161	0.272572963732	0.309491685763	0.338977180989	0.30765179884	0.32083186381	0.302560487141	0.290231019873	0.349638041947	0.272417413724	0.295295147069	0.238553436262	0.297752838436	0.0	0.275093181242	0.314902371448	0.281241190216	0.272197350034	0.329197099101	0.316344698048	0.276400591469	0.266092251901	0.304294834525	0.296278805263	0.277380694614	0.317946007569	0.369309929063	0.318556184859	0.370154594741	0.319248586962	0.284143175108	0.313846279055
C09	0.32347500996	0.312135729964	0.307676858965	0.302240975766	0.288193052929	0.328913833597	0.339554029298	0.278388747554	0.276491201588	0.337637475674	0.316095015101	0.343402432708	0.383374106739	0.316447265708	0.303434288441	0.346282300448	0.387010978395	0.326301232054	0.2843535791	0.342860358095	0.325311256231	0.314837275533	0.339741565745	0.384668518694	0.301436643579	0.38686342076	0.289026060434	0.377433825814	0.251500192471	0.32218860025	0.275093181242	0.0	0.337108422314	0.321171960999	0.303298438457	0.312073705467	0.345460113827	0.320277072126	0.317971415553	0.309668082947	0.311556028806	0.311717516659	0.360132653213	0.365359934493	0.31687037717	0.373281805167	0.358167273487	0.355574012009	0.350859023728
T01	0.288815080152	0.292479602803	0.300002821916	0.322826026698	0.253183386323	0.27930057226	0.312185293118	0.262115927567	0.319414298253	0.298196525794	0.315508024498	0.279658328878	0.332173113997	0.285128208742	0.280028567908	0.353958221911	0.334769784796	0.292913436906	0.324349341658	0.316550288912	0.293679347672	0.30984944065	0.307712616785	0.32846791558	0.247885311057	0.297370884872	0.253066354389	0.302566281124	0.281513176152	0.305540500041	0.314902371448	0.337108422314	0.0	0.270148180995	0.27411204489	0.282264601431	0.249732425107	0.270562454774	0.264086834106	0.254677954954	0.190731728379	0.266762022871	0.277018088836	0.270591543022	0.260916218288	0.316853370396	0.227506443038	0.261165763586	0.261814140885
T10	0.226945663889	0.307206562419	0.356397191736	0.301783235474	0.217155853891	0.256995269914	0.247899031919	0.255035537998	0.264890400684	0.257424283554	0.28350591418	0.207701770619	0.380652132726	0.281285475731	0.278960737384	0.331797944958	0.374870518247	0.333841704506	0.299554831017	0.326061046805	0.301452106776	0.270903156464	0.300256631431	0.355820584081	0.281847551936	0.331145218443	0.226810544551	0.283658461287	0.252821496246	0.269084830074	0.281241190216	0.321171960999	0.270148180995	0.0	0.25462359407	0.255287263916	0.241873838101	0.238235209098	0.21237195613	0.224611564868	0.268075269921	0.169223432453	0.304541610033	0.328299330738	0.271126339589	0.360468083945	0.264141320155	0.27064137416	0.243288470585
T11	0.279978364909	0.33290341165	0.324414467653	0.334440889979	0.273795131271	0.327209260733	0.338319826664	0.307744445825	0.274379639101	0.314027579382	0.291063217029	0.258342313372	0.363278351412	0.319025156869	0.321816263718	0.372062753145	0.363713298502	0.321266620598	0.350092569468	0.296228458263	0.302237345152	0.30300104097	0.31688921062	0.353907915357	0.309538419945	0.346632806212	0.258957172918	0.296209559066	0.303932880929	0.320025812027	0.272197350034	0.303298438457	0.27411204489	0.25462359407	0.0	0.23081414199	0.251104366004	0.206249717488	0.177337145662	0.254255725649	0.263249580562	0.261516394196	0.271002265477	0.350675910647	0.269365811297	0.320348960822	0.283543348241	0.225854746037	0.313310709491
T12	0.257995764103	0.337708633908	0.363605916963	0.3736367579	0.268742760343	0.309352825779	0.329804648702	0.275872597941	0.242998088193	0.297894402516	0.295652644815	0.228211092195	0.338874934291	0.289977270235	0.257177453257	0.376210217126	0.361103979943	0.297580021113	0.27372112619	0.265878286523	0.268093133309	0.247894877229	0.299903515253	0.34296457611	0.251773627685	0.316662463215	0.245870968346	0.264351823372	0.299214513914	0.372871663761	0.329197099101	0.312073705467	0.282264601431	0.255287263916	0.23081414199	0.0	0.213892670266	0.203650018508	0.210930384555	0.214578430699	0.201705564304	0.232572711935	0.223720283101	0.333367179104	0.208855936898	0.290299288232	0.257499484701	0.24317556224	0.234012142975
T13	0.225335633978	0.267063831239	0.308167849247	0.349965945183	0.248812382645	0.290865446162	0.308225013764	0.27499471154	0.261288367449	0.255183539571	0.247962572507	0.205978909292	0.295133016359	0.278135774987	0.282879819914	0.360744134457	0.350836182663	0.274259623139	0.246453958841	0.304123661648	0.271541179502	0.274962935156	0.308778367144	0.333502052134	0.268609272801	0.284253438725	0.21951576698	0.271253676786	0.285244588366	0.34104125818	0.316344698048	0.345460113827	0.249732425107	0.241873838101	0.251104366004	0.213892670266	0.0	0.224479869721	0.205319574504	0.233788555451	0.206998957802	0.236448636973	0.246832893623	0.336256045479	0.222342326403	0.25734544547	0.224300211342	0.228188245161	0.252113263421
T14	0.266349130282	0.274827160471	0.264676196115	0.294905080642	0.25512330651	0.297446334513	0.313770872704	0.26797255637	0.268392005854	0.285230712799	0.250400933257	0.226871317521	0.320035190843	0.262020364416	0.284423478129	0.346264855384	0.333092928061	0.289196711936	0.28884129001	0.271025568717	0.292937933369	0.293900896636	0.23933572673	0.30446891325	0.304151382541	0.316159875779	0.235101466969	0.254908424821	0.289259475482	0.329386619215	0.276400591469	0.320277072126	0.270562454774	0.238235209098	0.206249717488	0.203650018508	0.224479869721	0.0	0.194153957409	0.194206047373	0.224790256875	0.22566470401	0.222035643051	0.317891391776	0.211675037281	0.280243647847	0.240902706729	0.217725898948	0.279651069839
T15	0.211823323305	0.314897988519	0.319931703381	0.347774394875	0.215001723188	0.306240316993	0.328572064207	0.28132349526	0.229894355569	0.261645459444	0.292857996555	0.205540391906	0.337784165592	0.280526613075	0.260794025626	0.364805293134	0.363068974676	0.281893876875	0.31953865015	0.284216010763	0.252251807747	0.282268024902	0.30571466011	0.359885230381	0.288000836127	0.314111835276	0.206943476498	0.257587415626	0.267614172093	0.354199679179	0.266092251901	0.317971415553	0.264086834106	0.21237195613	0.177337145662	0.210930384555	0.205319574504	0.194153957409	0.0	0.248470599619	0.23779243409	0.205180943081	0.251734563599	0.361749531931	0.262800403658	0.329032831317	0.27852835265	0.215668292848	0.282768461074
T16	0.28115874379	0.302955217295	0.322025598193	0.29306668636	0.229902647432	0.295102625106	0.274105045038	0.261424197069	0.272110921506	0.295089971828	0.274829014433	0.246325118893	0.326352344489	0.234704598338	0.321016223329	0.363504898041	0.318139227525	0.279522534152	0.291639999976	0.284065999126	0.330703936071	0.27698734878	0.279996080194	0.313519850468	0.297861631544	0.297133814968	0.235119061264	0.27409629592	0.326757305058	0.302085073087	0.304294834525	0.309668082947	0.254677954954	0.224611564868	0.254255725649	0.214578430699	0.233788555451	0.194206047373	0.248470599619	0.0	0.250858230735	0.239679114904	0.263294241397	0.324334567218	0.226794098621	0.311194020752	0.239353041127	0.252825533799	0.236856536317
T17	0.238613884537	0.299099338228	0.311250973626	0.317693973888	0.264249195017	0.267717039108	0.314219679311	0.265594074534	0.279743022668	0.272833968825	0.290524357067	0.263768742955	0.322855189392	0.268589695756	0.214013521219	0.346161384228	0.330540735757	0.286922803819	0.249631188495	0.275550851963	0.271258423754	0.266233214884	0.28578914593	0.303002183818	0.206906217776	0.299109349957	0.231372825121	0.284209302698	0.235949013604	0.356434942939	0.296278805263	0.311556028806	0.190731728379	0.268075269921	0.263249580562	0.201705564304	0.206998957802	0.224790256875	0.23779243409	0.250858230735	0.0	0.23857510085	0.219490324446	0.26655957935	0.214503224064	0.277407218248	0.223304758282	0.223450386176	0.250029406181
T18	0.229780553561	0.265598206079	0.336389643812	0.31255660954	0.180261672734	0.242370302745	0.244521833842	0.221042701412	0.273848235657	0.25409546066	0.2780246149	0.174164533804	0.364720847928	0.254988737649	0.214544933408	0.303302976352	0.348018969213	0.261374076176	0.294754367585	0.281953403793	0.284844765207	0.254211854735	0.277773112628	0.31338816468	0.240606850503	0.289482247261	0.221669636034	0.230788053141	0.241188958731	0.283127383601	0.277380694614	0.311717516659	0.266762022871	0.169223432453	0.261516394196	0.232572711935	0.236448636973	0.22566470401	0.205180943081	0.239679114904	0.23857510085	0.0	0.274587436958	0.311666179003	0.206181274398	0.313435122211	0.237326146345	0.249937505497	0.224102183556
T19	0.305594760943	0.308939032519	0.333900415598	0.346405530266	0.314327862181	0.350163481651	0.351319586972	0.276677427745	0.31123767514	0.301953167445	0.308283245078	0.278915019464	0.334971684658	0.319710667759	0.291799707458	0.397666204174	0.347053726457	0.323227995842	0.288119415292	0.316478941049	0.299925052804	0.30255197938	0.287671408072	0.345710623273	0.317843593985	0.319308674137	0.285050943333	0.283775019916	0.300317800675	0.371884005626	0.317946007569	0.360132653213	0.277018088836	0.304541610033	0.271002265477	0.223720283101	0.246832893623	0.222035643051	0.251734563599	0.263294241397	0.219490324446	0.274587436958	0.0	0.316584013545	0.276134645795	0.235256140814	0.263488183781	0.20119698992	0.277274154364
T02	0.385498887089	0.334048833988	0.358207158773	0.354297873212	0.355251766892	0.358662169944	0.314362192644	0.313894717356	0.409718017931	0.382331559478	0.353197904532	0.360322558297	0.381772179264	0.36553855858	0.321533020069	0.389452186942	0.397776417261	0.398202348263	0.340752307276	0.408696267594	0.374992814819	0.35796321363	0.331362147469	0.353666145366	0.291269084709	0.372339304044	0.35514561435	0.330755389254	0.335069820215	0.324536419106	0.369309929063	0.365359934493	0.270591543022	0.328299330738	0.350675910647	0.333367179104	0.336256045479	0.317891391776	0.361749531931	0.324334567218	0.26655957935	0.311666179003	0.316584013545	0.0	0.305089374932	0.329321872137	0.295475126781	0.313187444341	0.337955679776
T20	0.271641257728	0.256680130351	0.313241625538	0.300522791428	0.246048740695	0.281072524759	0.280684417626	0.238039375366	0.267638237924	0.268453306609	0.242366804281	0.233431965878	0.303610941164	0.257993783398	0.265040153009	0.336544970264	0.351716702396	0.275506958399	0.254653403494	0.314694730167	0.290480271197	0.285282750549	0.25692784786	0.283558081877	0.264025572064	0.296349049873	0.238106778214	0.253007318933	0.297850658454	0.307077734242	0.318556184859	0.31687037717	0.260916218288	0.271126339589	0.269365811297	0.208855936898	0.222342326403	0.211675037281	0.262800403658	0.226794098621	0.214503224064	0.206181274398	0.276134645795	0.305089374932	0.0	0.277030669883	0.213999383855	0.215458614165	0.240909237466
T21	0.336912623535	0.303757257164	0.354567296026	0.368049706059	0.35660973524	0.374963706889	0.376682251848	0.345850324383	0.356205407627	0.333912579247	0.277570934278	0.296934756824	0.283327618009	0.342117775161	0.347561398366	0.399896124686	0.395362984233	0.352897104664	0.279849436013	0.376530436391	0.313962041695	0.338352025624	0.306537795666	0.349519725137	0.353656025102	0.354950258471	0.328504737754	0.307854106064	0.329669119529	0.370538308374	0.370154594741	0.373281805167	0.316853370396	0.360468083945	0.320348960822	0.290299288232	0.25734544547	0.280243647847	0.329032831317	0.311194020752	0.277407218248	0.313435122211	0.235256140814	0.329321872137	0.277030669883	0.0	0.244491161794	0.247534873744	0.290513774803
T22	0.289900783408	0.283755953891	0.323113135711	0.32470816763	0.25829225245	0.301467248361	0.308421475022	0.302336585346	0.321158896914	0.309272454292	0.276841859686	0.251847047932	0.310408727698	0.305677330151	0.279626711401	0.35477748266	0.343679178604	0.298167357593	0.279255587775	0.336250099103	0.320156565143	0.307445478326	0.26492602177	0.338174544319	0.307340867244	0.327563080335	0.293656096795	0.265193638388	0.288908254627	0.298376230803	0.319248586962	0.358167273487	0.227506443038	0.264141320155	0.283543348241	0.257499484701	0.224300211342	0.240902706729	0.27852835265	0.239353041127	0.223304758282	0.237326146345	0.263488183781	0.295475126781	0.213999383855	0.244491161794	0.0	0.216598393912	0.279953822144
T23	0.276147007073	0.267174787262	0.294416780556	0.312659037399	0.294708054381	0.3278975806	0.317716678541	0.281472043406	0.3021412234	0.298488069858	0.274289901335	0.264872708937	0.299751276622	0.282059591234	0.297508515944	0.350943288964	0.316617451016	0.284485331127	0.270381403669	0.3078593202	0.277577955528	0.319401745512	0.245600865006	0.312114113466	0.288344510873	0.287131673143	0.2295631702	0.26218815694	0.312992272501	0.323597498611	0.284143175108	0.355574012009	0.261165763586	0.27064137416	0.225854746037	0.24317556224	0.228188245161	0.217725898948	0.215668292848	0.252825533799	0.223450386176	0.249937505497	0.20119698992	0.313187444341	0.215458614165	0.247534873744	0.216598393912	0.0	0.303294644718
T24	0.257724045289	0.334219039478	0.371176059796	0.371491028673	0.2176877472	0.315256541578	0.328572422482	0.267255476248	0.281529640911	0.295110999263	0.3105445993	0.260239405368	0.376076382061	0.269651784449	0.292107814753	0.361345199472	0.39996617205	0.318859729262	0.281520690409	0.338648328731	0.288595730052	0.260610715894	0.332031555015	0.372026940776	0.272318045115	0.349407958003	0.253178103114	0.282722498028	0.291653238624	0.360660609872	0.313846279055	0.350859023728	0.261814140885	0.243288470585	0.313310709491	0.234012142975	0.252113263421	0.279651069839	0.282768461074	0.236856536317	0.250029406181	0.224102183556	0.277274154364	0.337955679776	0.240909237466	0.290513774803	0.279953822144	0.303294644718	0.0
T25	0.240713209745	0.299627207294	0.360371844225	0.329976324148	0.273686516906	0.262323515005	0.271144370082	0.282449842848	0.278710596538	0.27541701239	0.280278789292	0.255771803441	0.297783119945	0.288687908773	0.197868247823	0.360638937843	0.349318071176	0.289457371457	0.235185447991	0.295941849683	0.274441456553	0.276998287593	0.281937123665	0.298328316035	0.263330693093	0.319180153892	0.228453721185	0.29585264703	0.249503390762	0.328872071834	0.324012833672	0.311770654824	0.265023767488	0.263823692585	0.301607896984	0.23470448596	0.235542166165	0.27720656808	0.271680532221	0.250233253233	0.185340841036	0.259158873532	0.253291092711	0.300209094507	0.237930800514	0.303713214786	0.234757124308	0.269191040292	0.272307954511
T26	0.261962143978	0.308200450737	0.364900960905	0.317798858925	0.264943907662	0.279971173968	0.25816025236	0.28918749169	0.275548488379	0.286020782246	0.320871007802	0.20632211548	0.357664555796	0.284727968805	0.208475950438	0.344767227913	0.375398123896	0.293100468212	0.283586840264	0.309167947295	0.269317210991	0.286996114259	0.292863997061	0.343902198815	0.225756663513	0.317973807893	0.244263022362	0.330451057293	0.280240166716	0.267175664281	0.322052523993	0.294081914873	0.262930434442	0.203844044697	0.296323904561	0.25306320872	0.265662652991	0.286303461008	0.275145296989	0.273674657633	0.232455568617	0.207723117003	0.290752783177	0.285564633183	0.23308162477	0.328779270527	0.257288051221	0.281208385271	0.246664970762
T27	0.232026084541	0.34033734216	0.34661106467	0.362950788419	0.262062926086	0.325987547414	0.300364010131	0.286795037797	0.284775091528	0.304629015366	0.311985663434	0.247486263587	0.338184137219	0.31847325139	0.270038533488	0.366930145248	0.36347792373	0.299424056252	0.248659336318	0.316834731182	0.268518814658	0.226140878833	0.298477452299	0.374517985706	0.256639328703	0.292747496651	0.281223359151	0.273572791825	0.287368930126	0.364503480359	0.31411284686	0.339441456886	0.282315601231	0.251608332756	0.296240002095	0.220461454861	0.204771392349	0.274283042467	0.257720539847	0.247938913754	0.214776814887	0.248661739394	0.227003518448	0.331298715763	0.249748581291	0.288396368155	0.242895345393	0.257756796654	0.21687875657
T28	0.203153801428	0.305167639613	0.324840584482	0.346954647173	0.231884179803	0.278082282507	0.284326089328	0.247944616781	0.250002935154	0.270610190437	0.283250473171	0.204660384349	0.31409367345	0.27058908035	0.217425785469	0.356598482097	0.34579678426	0.263678708042	0.263541462695	0.276751557214	0.250448562845	0.247053901402	0.281769281361	0.337230373105	0.198879422347	0.289883037757	0.220868002656	0.275769090215	0.269034608689	0.333063284881	0.308439474393	0.290807574173	0.246044310805	0.250845990378	0.274745746879	0.184900477638	0.197683927172	0.239611684106	0.221840792349	0.240526247618	0.17251699787	0.202564763471	0.25983848922	0.30775250053	0.217669014396	0.282885054952	0.232346054578	0.251988063672	0.23035466653
T29	0.269232662331	0.262159897194	0.318965140401	0.312442924604	0.293291943212	0.31258770926	0.269706329165	0.282628073074	0.331604404604	0.283191966337	0.261040099957	0.25668419583	0.311515120112	0.280473396419	0.30068594149	0.348334395734	0.318443278596	0.286918519024	0.269249576308	0.308977246263	0.286171415875	0.331724437429	0.255293173281	0.274125086484	0.308427534011	0.313114498487	0.256634625539	0.255485507425	0.303904501653	0.301529122488	0.33166144237	0.360607856368	0.277643794238	0.287456996597	0.302196040049	0.27086789998	0.239335610344	0.241029858524	0.284418947333	0.245836948762	0.234512455917	0.243234277323	0.266527697715	0.315243230848	0.209008340824	0.2748634033	0.235139052422	0.229485929273	0.307156948549
T03	0.365214872462	0.320934200069	0.343191183618	0.354352483157	0.35912032809	0.328002710445	0.337139777076	0.299501925866	0.347367678863	0.333553075908	0.330480726345	0.335650450383	0.295523223826	0.328760122921	0.276759116262	0.384012284312	0.372507860663	0.345083288834	0.296903954177	0.314470972937	0.301684957285	0.318874519532	0.327667545666	0.317529036344	0.278377666579	0.315951538541	0.337314500481	0.335093416942	0.306832157127	0.351413192422	0.358197127351	0.383331353214	0.248165068177	0.356702076031	0.349057014411	0.269712116681	0.292089460167	0.295288973089	0.342543489851	0.311605124803	0.235159649478	0.336694303828	0.262293006291	0.313372373219	0.278984445392	0.284911406098	0.264608606893	0.277414225065	0.317512940574
T30	0.251137162842	0.27668283117	0.31804018399	0.300270818806	0.309949854961	0.291884646749	0.293759032139	0.279923854363	0.305915821349	0.294164922523	0.269535191009	0.237639336274	0.302110266587	0.262458492366	0.274415768111	0.323202313261	0.30266734727	0.275599198873	0.309110018838	0.289922770304	0.300536542332	0.322544347925	0.210784976096	0.305973496406	0.296518725035	0.308205327567	0.254848983457	0.288578900948	0.330423853043	0.317842378904	0.341615393843	0.349646143857	0.263469414637	0.292177177129	0.268056981275	0.251266213403	0.259546602646	0.219498874391	0.267866141224	0.24716060564	0.228024427096	0.245809500269	0.267808408275	0.319570776571	0.199089045863	0.294781954395	0.227845058262	0.231325781531	0.314852769881
T31	0.175062762092	0.320767720479	0.318164556702	0.327754887614	0.246564492066	0.294122156645	0.307858351035	0.276597000661	0.252716330895	0.251267487409	0.281049737812	0.178995040641	0.354603243361	0.311248702379	0.238965099093	0.356006959483	0.365778748267	0.274716168805	0.257784502146	0.272952154029	0.245002287331	0.243904685634	0.298373506897	0.341148741217	0.301359669154	0.313851719874	0.233839645202	0.292430068034	0.235074603711	0.353629797685	0.275428899373	0.294519526036	0.281149792118	0.227041650984	0.238721320826	0.235298942112	0.218896673894	0.24208640588	0.201569702467	0.270547966271	0.241728692759	0.209057863304	0.265655313532	0.375694443676	0.229542866915	0.29890640906	0.26158359993	0.25065194368	0.253153668761
T32	0.245932759197	0.315993885128	0.343245642705	0.34890521186	0.214176231913	0.256628723488	0.27777539779	0.255008290639	0.269644041388	0.25671930758	0.253926820827	0.189308394954	0.330417711988	0.234643583614	0.274205267206	0.345851409503	0.335464340201	0.284350701452	0.308709722478	0.29410926649	0.308095433247	0.257262072354	0.293072196857	0.341389223978	0.279882034828	0.293556998127	0.243218353645	0.244437813278	0.299066821407	0.340900587437	0.316556233516	0.346138696719	0.261644872809	0.248417069414	0.242364020671	0.230956695955	0.228551557111	0.216440937701	0.225284403899	0.200379417766	0.226830445992	0.20946243929	0.246827695321	0.33789623912	0.227100144641	0.298083222358	0.242833704049	0.25184890853	0.229858763139
T33	0.215012312869	0.27063924356	0.32823398663	0.31729997177	0.195360899323	0.204991268651	0.274080617595	0.237799953706	0.253913598712	0.228268321988	0.263280599596	0.19319552803	0.339326640836	0.255115190781	0.201639679379	0.341911491387	0.355772749146	0.27885793383	0.29027435008	0.296851408134	0.286502805721	0.272256046644	0.282385211164	0.326908784534	0.247384399242	0.298950408769	0.202952125538	0.25229988314	0.227746832054	0.322840753982	0.302740240549	0.312913087062	0.210957023078	0.212086244811	0.273106534981	0.242190856232	0.229230744631	0.224543615785	0.21323862517	0.251928644334	0.210656811078	0.19871974551	0.282195542313	0.313901575844	0.220016587179	0.355704805749	0.252750291424	0.266845217222	0.255512697378
T34	0.2327862682	0.268387459212	0.35489922792	0.293297320446	0.237858156474	0.245700193995	0.190070124787	0.241222933703	0.28985108535	0.257878331695	0.282234869587	0.203924617531	0.350090115182	0.270040034429	0.280479469072	0.308736097439	0.352689226745	0.308456053041	0.30467287923	0.316745871219	0.314565277474	0.283208565606	0.263141208474	0.329898152365	0.285081596276	0.300801097531	0.211976373452	0.233552991696	0.262935281432	0.251444240117	0.308084727704	0.326274213271	0.284347871004	0.165026711775	0.30131745196	0.276378733535	0.253242096256	0.250222878116	0.238807033962	0.255572224131	0.259257991553	0.168901217359	0.292922742659	0.303772644175	0.244855904123	0.342652340423	0.260811726318	0.263779121284	0.281115516066
T35	0.229767394575	0.262653590418	0.33299828107	0.293281811347	0.22215126347	0.249314758662	0.257926400145	0.199360753817	0.269506344648	0.275528572391	0.271624639803	0.177334608019	0.350495299879	0.261978460158	0.245725921961	0.31751609247	0.317166119101	0.263999158704	0.301443012107	0.2958604531	0.298227814131	0.265199840876	0.229604157292	0.31719588794	0.267784937599	0.274274998867	0.220586690907	0.21551795394	0.256513138733	0.295789284666	0.280140197696	0.314657723528	0.232856926317	0.215761849088	0.268240609287	0.236105373336	0.228322575355	0.218247293959	0.24659583383	0.218909245593	0.24513632335	0.157439218329	0.240463621603	0.309943066748	0.220739727769	0.31771598636	0.239253692989	0.254305657905	0.23393536328
T04	0.255913204793	0.356224589385	0.35475403763	0.343754961082	0.250337425816	0.285544379023	0.336513226685	0.289105752675	0.240551160549	0.286438518452	0.318557866456	0.268327908563	0.364528479651	0.325388439585	0.248699132206	0.35434853782	0.402083078214	0.290938921096	0.298523470483	0.303817897059	0.261401425467	0.262839857693	0.336239124307	0.368654376609	0.291631762463	0.353686341964	0.262157829309	0.317572591224	0.242355157202	0.35645302312	0.291238898028	0.324065203635	0.262331005557	0.254884307713	0.252622009839	0.26373668361	0.30491813674	0.277270488693	0.238044548905	0.305782835037	0.250782581644	0.260858928281	0.310443074395	0.353966961863	0.27211989867	0.357482314594	0.285840340766	0.286703941608	0.286788902192
T05	0.444798634884	0.388136120803	0.378252038943	0.398288341656	0.412695955564	0.421934453336	0.41697435311	0.372789513124	0.406352261319	0.436967563261	0.396708612749	0.409358423696	0.359002599762	0.386047815895	0.401738572657	0.437277881089	0.397835370518	0.401289248914	0.327954729577	0.375664939013	0.383771360716	0.407209946033	0.345586214506	0.373238932202	0.378962571422	0.418509403892	0.404082667454	0.384830121188	0.416414264431	0.406136131669	0.41642856794	0.400130464452	0.356470828244	0.42597363993	0.397918843468	0.353071969202	0.377872856669	0.357447132015	0.40011528283	0.353294541362	0.356286566791	0.398185763087	0.331363023681	0.364829372125	0.357681302802	0.322388938132	0.370542983849	0.34917723004	0.390238438962
T06	0.423922854744	0.383691682461	0.348099041648	0.374126637555	0.358530098757	0.37955775588	0.357943037918	0.362519123019	0.410595381754	0.400755758363	0.358283142563	0.383161751358	0.321357767071	0.372651324067	0.347661036393	0.430295387158	0.375569753425	0.387568911537	0.33838670055	0.391518399066	0.375911852148	0.367234532561	0.356335370294	0.358679797577	0.340357832801	0.410612983436	0.394205334992	0.384460098008	0.372867984792	0.339403727814	0.391693626821	0.36246689206	0.25561030697	0.385579281295	0.359060319081	0.339650841925	0.335286379461	0.348690979069	0.383340653893	0.328255663636	0.304188998767	0.379515821595	0.346669775023	0.295471756155	0.320530558473	0.325694499137	0.270108694606	0.339238766502	0.356619643248
T07	0.323235365111	0.31044719093	0.328661880048	0.305926458983	0.303919846598	0.29605290762	0.325022157978	0.278870156466	0.309788419752	0.332059786884	0.329654114638	0.300853827847	0.344400531421	0.296612820063	0.283752280314	0.362335136916	0.376480962663	0.306560130306	0.338658219325	0.333855310812	0.328546456473	0.304325127774	0.328165985069	0.321919259511	0.28553933865	0.324377941845	0.31139161126	0.292255408407	0.292104938268	0.329258416269	0.327206365695	0.357515159524	0.227543668429	0.316407460928	0.282141185621	0.297881618159	0.281183304736	0.295044864978	0.293830243871	0.287695241625	0.252592100172	0.286225836057	0.324348907088	0.311124505057	0.269323708646	0.318239236917	0.252611536502	0.278854503779	0.329181129898
T08	0.275610884036	0.329369776607	0.335543724446	0.315198080849	0.270221265785	0.284232351171	0.289273250047	0.26666193667	0.287858727151	0.308404530711	0.320240506006	0.265890518799	0.360525966787	0.288708508796	0.308879578428	0.340756647006	0.360380796144	0.309319525661	0.312637285259	0.310594135002	0.335773652861	0.273047941025	0.318661706665	0.364425682277	0.305252848951	0.319153009306	0.293296459371	0.302013465012	0.300350100029	0.328023613048	0.322156510807	0.328676337777	0.241028364009	0.283175946753	0.289202967402	0.274489910096	0.275838279012	0.279321589338	0.304969730489	0.227884031722	0.265178939066	0.278359776235	0.320626757139	0.304656958604	0.251773199086	0.342946695025	0.265682686764	0.278357178722	0.242989919251
T09	0.233192303795	0.308951787429	0.329082775628	0.327685278908	0.252048350832	0.232609120009	0.302647957014	0.288367588786	0.253171982134	0.240962857718	0.267906409199	0.229289598013	0.337795705246	0.299750314665	0.229286599589	0.329191738151	0.346387343877	0.29088310116	0.318184401506	0.303108416002	0.265328555477	0.292407190918	0.321674590982	0.330510324486	0.277119424077	0.290659761656	0.224441934608	0.286970756419	0.239182004554	0.327469586715	0.300597437914	0.322043938685	0.226919632935	0.221036695836	0.201076408114	0.235283732333	0.223571301636	0.216058375203	0.188797907709	0.262227831588	0.197244947931	0.227482228815	0.289768529809	0.335901721306	0.264913956331	0.339641592219	0.257880192667	0.241078442087	0.302026803922
[truncated: 18 more columns]
