# Supplementary material for: Characterization of gut microbiota in adults with coronary atherosclerosis
Source: PeerJ journal article supplement (doi:10.7717/peerj.15245), 2023-05-18
Supplement: Raw_Data.zip [file Figure3A_groups.sample.phylum.bar.xls]

Phylum	T01	T02	T03	T04	T05	T06	T07	T08	T09	T10	T11	T12	T13	T14	T15	T16	T17	T18	T19	T20	T21	T22	T23	T24	T25	T26	T27	T28	T29	T30	T31	T32	T33	T34	T35	C01	C02	C03	C04	C05	C06	C07	C08	C09	C10	C11	C12	C13	C14
Firmicutes	0.2653023598820059	0.40095615705022686	0.5813838992659784	0.602471535684532	0.28974615898463596	0.596073798304782	0.542341706028635	0.5092431955860186	0.7782587926195736	0.5227925110320895	0.4467314146544299	0.59022949522356	0.5733774526877975	0.43354440299677127	0.6975774821195109	0.33859958163602333	0.6416780908149847	0.5809558986481496	0.3478984485190409	0.5773209951456311	0.5437106918238994	0.9133790373878012	0.3928611359570662	0.5802666830905675	0.6970019589472788	0.5955936920222634	0.6580977256411431	0.6811727583486721	0.6058462858645555	0.8473942603211773	0.5706830513884456	0.46156380925481333	0.6849170713827545	0.417499165361206	0.7200516675858466	0.6854632995344685	0.6332319691729149	0.390127970749543	0.6519970580730379	0.522948138169922	0.577523919623979	0.32860506435164455	0.39040158198965624	0.4555205697133777	0.3768414935347959	0.42658791514626754	0.28249148694665155	0.62107029985937	0.4096538217844594
Bacteroidetes	0.6733191986234022	0.5249273578288937	0.41318553440353284	0.3666574099787096	0.46238309953239815	0.09860838267415822	0.3735193278300152	0.3827820596683826	0.18225652355645788	0.3453793753480999	0.36264813329769224	0.3281470804363801	0.33466852432369676	0.27690354534340617	0.27222948550334536	0.36132059892106133	0.2819712950787567	0.3994385757553372	0.5406629055007052	0.2707220873786408	0.36232404911650196	0.018050745635733976	0.48403957960644006	0.36182366889415823	0.2816909405785992	0.34867037724180583	0.27959797766882033	0.2826423583720455	0.2876084760072525	0.009606045688588498	0.3769549952122566	0.4567308446704012	0.2895781789303277	0.5384319063150055	0.26446257002699486	0.28298577896817806	0.3482903502866826	0.429869216706511	0.3243024180838449	0.38443457821885607	0.2529928050987968	0.2732958731167574	0.4169911773653788	0.4969248425637102	0.5703327037628941	0.4703599480487352	0.435527809307605	0.3579410563880782	0.53661943436438
Proteobacteria	0.05655420353982301	0.06355295363783404	0.004028167333054842	0.02260174642846123	0.1748496993987976	0.22191694256315855	0.07227887402698686	0.1049600409544666	0.013494954320176748	0.12370935264127501	0.06633698654548695	0.06527330280933809	0.08685997910135841	0.28387824833077335	0.02105667922787049	0.10263679401078939	0.058193212657023756	0.014892516805791534	0.01782792665726375	0.13684769417475728	0.07602575621443546	0.06403279383702029	0.058908206618962435	0.034859729621531735	0.009127558697442013	0.007699443413729128	0.04846568604988621	0.007903117421918368	0.030532449377863282	0.004417184444060084	0.02047558250877753	0.07216494845360824	0.01744097254039525	0.008269344359125812	0.0112913993788279	0.022144633633059116	0.012883307411964065	0.1679510617353396	0.01576032301157258	0.027243611771659498	0.1174457340168236	0.1370957257796588	0.016747794341344692	0.021614384085692426	0.01452854859799506	0.10077926897148864	0.016685584562996594	0.012399631035369191	0.04593629399228155
Actinobacteria	0.004071411012782694	0.010348825558593247	0.0012382884764575999	0.002051899163812521	0.07146236918281007	0.04944156718365777	0.00195706234641475	0.0023036887460538666	0.007478951453991759	0.006405038344543936	0.0014701951349906442	0.015177208750211972	0.004411935446418205	0.004545312059183098	0.0025994001384295933	0.02056038753715733	0.003063536916319279	0.0031617049567851073	0.09297602256699578	0.013971480582524272	0.0038035339922132374	0.0026998374443423564	0.04824463327370304	0.00495796507868075	0.010859381654032876	0.011301793444650588	0.009409033282927798	0.0026879364244602215	0.0037646537764183196	0.0035124599193730793	0.027369932971592723	0.008159550597059424	0.0009774275329118177	0.0030817432394257683	0.003454181300978201	0.007987373254256743	0.0026230878154088998	0.0018281535648994515	0.0022965042102577188	0.04059050734697805	0.05159641623948525	0.2243279550477401	0.1744599939154244	0.025572361838620446	0.03759988377161121	0.0012833199332055168	0.26445800227014754	0.005322768444451165	0.00417602672657105
Fusobacteria	9.218289085545723e-05	5.725491318723788e-05	1.4919138270573492e-05	3.085562652349656e-05	0.001210754843019372	0.033492231395875975	0.009638164187230536	0.00041238872614544523	0.0002985609362870962	0.0005462490895848507	0.007633134337224153	0.00025436662709852465	0.00011610356437942645	0.0005642456349330742	9.228639544720449e-05	0.04399702741385005	0.01418459558514954	8.864593336780675e-05	4.231311706629055e-05	0.00042475728155339805	0.013896376160527104	0.00028270549155417346	0.014926207513416816	0.01721430111169279	0.0009794736393833575	0.0006184291898577613	0.004047717240220562	0.02537470418090981	0.07177755325185811	0.13312755285320846	0.0009415895308011491	0.0007531892858824083	0.00030544610403494306	0.03020108374637253	5.805346724333111e-05	3.188572157387922e-05	0.0007892476612734743	0.00883138799043735	4.50294943187788e-05	0.016879493065387417	6.08448304710911e-05	0.00010111369512776437	3.0422878004259203e-05	0.0002648460949914661	0.0002905709719599012	0.0006493908095738759	0.0003547105561861521	0.0004082805340914246	0.0003456022118541559
Verrucomicrobia	3.072763028515241e-05	7.156864148404735e-05	7.459569135286746e-05	0.0034712579838933628	0.0	0.0	1.471475448432143e-05	0.00017064361081880493	0.017734519615453515	0.000599802921897091	0.11510588375063115	0.00026849810638177605	0.00042087542087542086	0.00037616375662204946	0.0002614781204337461	0.13247275129362546	0.00030775256693618333	0.0005909728891187116	0.0003244005641748942	0.0006674757281553398	0.00016471997604073076	0.000862251749240229	0.0003354203935599284	0.0008314599821390078	9.936689095193481e-05	0.0360235003092146	0.0003207624982816295	0.00017530020159523183	0.00016608766660669057	0.001210734290389963	0.0022502393871688476	0.00036090319948532066	0.0005650752924646446	0.0017463211690079356	0.0004354010043249833	0.00046234296282124865	0.0010678056593699946	0.001026578540289692	0.005433558981132642	0.007642506632211241	1.5211207617772775e-05	5.7779254358722504e-05	1.5211439002129602e-05	0.0	2.905709719599012e-05	1.546168594223514e-05	4.256526674233825e-05	0.00019657951641438963	8.640055296353897e-05
Tenericutes	1.5363815142576205e-05	5.725491318723788e-05	0.0	0.002607300441235459	0.0	0.0	0.0	1.4220300901567077e-05	0.00010449632770048366	0.00017137226339916883	1.4850455908996406e-05	1.4131479283251371e-05	0.0	4.702046957775618e-05	0.006029377835884027	1.37619729164373e-05	2.7977506085107574e-05	0.0008273620447661964	1.4104372355430183e-05	0.0	0.0	0.0	0.0	1.539740707664829e-05	0.0	6.184291898577613e-05	0.0	1.4608350132935986e-05	1.3840638883890881e-05	1.3304772421867724e-05	0.00011171401212894988	3.1382886911767016e-05	0.006078377470295366	0.0005136238732376281	7.256683405416388e-05	3.188572157387922e-05	0.0009749529933378212	5.6250878919983125e-05	4.50294943187788e-05	1.3745515525559787e-05	7.605603808886387e-05	0.035375348481127854	4.56343170063888e-05	4.4141015831911014e-05	4.358564579398518e-05	1.546168594223514e-05	0.00015607264472190693	0.002464804705811193	0.0025344162202638096
Patescibacteria	0.000599188790560472	2.862745659361894e-05	7.459569135286746e-05	3.085562652349656e-05	0.0003479180583389	0.00046707787836742544	0.00022072131726482143	8.532180540940247e-05	0.0001642085149579029	0.00012852919754937663	4.455136772698922e-05	0.0006359165677463117	0.00013061650992685477	4.702046957775618e-05	0.00013842959317080674	0.0003715732687438071	0.0005735388747447052	2.9548644455935583e-05	0.0002538787023977433	3.0339805825242717e-05	7.487271638215035e-05	0.0006784931797300163	0.0006568649373881932	0.0	0.0002413195923118417	3.0921459492888065e-05	4.582321404023278e-05	2.921670026587197e-05	0.00026297213879392675	0.0007051529383589894	3.191828917969997e-05	9.414866073530103e-05	0.00010690613641223006	0.00012840596830940702	0.00014513366810832776	0.0	6.963949952413008e-05	7.03135986499789e-05	4.50294943187788e-05	0.00016494618630671744	0.0002738017371199099	0.00021667220384520938	9.12686340127776e-05	5.885468777588135e-05	1.452854859799506e-05	0.00027831034696023255	0.00011350737797956867	0.00016633651388909892	0.0001008006451241288
Cyanobacteria	1.5363815142576205e-05	0.0	0.0	1.542781326174828e-05	0.0	0.0	2.942950896864286e-05	1.4220300901567077e-05	0.00020899265540096732	0.00025705839509875325	1.4850455908996406e-05	0.0	1.4512945547428306e-05	9.404093915551237e-05	1.5381065907867414e-05	2.75239458328746e-05	0.0	1.4774322227967791e-05	0.0	1.5169902912621359e-05	0.0	1.4135274577708671e-05	2.795169946332737e-05	0.0	0.0	0.0	0.0	0.0	2.7681277767781762e-05	1.3304772421867724e-05	1.5959144589849985e-05	0.00014122299110295156	3.05446104034943e-05	0.00012840596830940702	2.9026733621665555e-05	0.0008290287609208596	6.963949952413008e-05	0.00023906623540992828	7.504915719796467e-05	8.247309315335872e-05	0.0	0.0009244680697395601	3.0422878004259203e-05	0.0	0.0003196280691558913	1.546168594223514e-05	0.00015607264472190693	3.024300252529071e-05	0.0005472035021024135
Synergistetes	0.0	0.0	0.0	6.171125304699311e-05	0.0	0.0	0.0	1.4220300901567077e-05	0.0	1.0710766462448052e-05	0.0	0.0	0.0	0.0	0.0	0.0	0.0	0.0	0.0	0.0	0.0	0.0	0.0	3.079481415329658e-05	0.0	0.0	1.5274404680077595e-05	0.0	0.0	0.0	0.0011650175550590488	0.0	0.0	0.0	0.0	6.377144314775843e-05	0.0	0.0	0.0	0.0	1.5211207617772775e-05	0.0	0.001186492242166109	0.0	0.0	1.546168594223514e-05	1.4188422247446084e-05	0.0	0.0
[truncated: 18 more columns]
