# Supplementary material for: Characterization of gut microbiota in adults with coronary atherosclerosis
Source: PeerJ journal article supplement (doi:10.7717/peerj.15245), 2023-05-18
Supplement: Raw_Data.zip [file Figure3B_groups.sample.family.bar.xls]

	T01	T02	T03	T04	T05	T06	T07	T08	T09	T10	T11	T12	T13	T14	T15	T16	T17	T18	T19	T20	T21	T22	T23	T24	T25	T26	T27	T28	T29	T30	T31	T32	T33	T34	T35	C01	C02	C03	C04	C05	C06	C07	C08	C09	C10	C11	C12	C13	C14
Bacteroidaceae	0.510370575221239	0.4531296966920974	0.2669630602136421	0.11097226079175537	0.46149242930305057	0.09129998763617381	0.35597934048470403	0.03181081311680555	0.13085925837463427	0.29915170729617413	0.13277792628233687	0.03244587643434515	0.2970074306281203	0.2295539324786057	0.1238175805583327	0.17382747990751954	0.248636096578351	0.05810740932259732	0.5141607898448519	0.254808859223301	0.34654088050314463	0.009301010672132307	0.48264199463327373	0.17916422874387952	0.2460324219969906	0.1612708719851577	0.09273091081275107	0.22258743097554562	0.25263318154766023	0.008275568446401725	0.352345994254708	0.415274051059957	0.25646782125293993	0.5265158324558925	0.14401613886389364	0.22422039410751865	0.06476473455744099	0.40002812543946	0.2247121864821458	0.2838723866338607	0.19458176784654935	0.26813907466524145	0.2108457560085184	0.46162674357012534	0.4875490338515182	0.43088626383820894	0.3659477866061294	0.07476070224251864	0.09504060825989287
Ruminococcaceae	0.06692477876106195	0.17020454317736142	0.11472817330071015	0.34238945971797957	0.014668225339568025	0.014259612874864342	0.2456186818522933	0.2628196012627627	0.3398519137756016	0.1498757551090356	0.07013870325819002	0.18000678311005597	0.26147973992801576	0.07012319363029372	0.4123663769899254	0.07215402400088076	0.10042525809249364	0.2791164955307675	0.19954866008462624	0.09344660194174757	0.04552261156034741	0.569920135698636	0.11528678443649373	0.22183044375327196	0.3512477642449536	0.3304730983302412	0.20215674594082694	0.2790487042393432	0.007307857330694385	0.007277710514761645	0.2651292690711778	0.24423731739082677	0.32355905800421514	0.10655127250314594	0.47124902034774024	0.30206938333014477	0.28013649341906727	0.01106736042750668	0.40313405280458703	0.029951478330194774	0.3219908428530141	0.027604038769879675	0.21457255856404014	0.2592990406685893	0.11428156327182915	0.09198156967035685	0.09662315550510783	0.25940935416068106	0.1802171533897817
Lachnospiraceae	0.17719088003933137	0.13814179179250818	0.2143730978098705	0.14704248819772286	0.15706412825651303	0.41024549063783605	0.23110993393075235	0.0810699354398339	0.15838657670030454	0.12685831798123473	0.07517300781133981	0.2644847662653327	0.2714356205735516	0.31403404281997427	0.19597016073213874	0.12669272266872178	0.4135495061970176	0.20175814434512818	0.13262341325811	0.08376820388349515	0.3144953578915843	0.22976888826065447	0.2102806350626118	0.13277184122193822	0.24963802061153223	0.14850030921459492	0.23667690051780232	0.20580243667280218	0.449267138171098	0.08859647955721717	0.16029364826045325	0.12200097286949427	0.2630654571000947	0.2982613831890906	0.16453803953441118	0.23891971175307697	0.2509111167854407	0.3256785262269723	0.14958798012698318	0.2853019202485189	0.19623978947688658	0.2271591385113175	0.06738667477943414	0.12368312636101465	0.13664099956414355	0.17767023316222402	0.12603575482406357	0.22149975049522916	0.07712689361211912
Veillonellaceae	0.010677851524090462	0.04455863618796788	0.15963477949513635	0.0735906692585393	0.10221832553996883	0.0033107579025455744	0.05894730646419165	0.08825118739512527	0.26540574431241415	0.21065935478342832	0.27740651638005287	0.03467865016109886	0.009317311041448973	0.010046706999780572	0.05643313081596554	0.02731751623912804	0.0014828078225107013	0.004166358868286917	0.0021720733427362483	0.34368932038834954	0.09607666966157533	0.04707046434376988	0.037036001788908764	0.01234872047547193	0.02430230247281606	0.08961038961038961	0.05404084375811453	0.003330703830309405	0.0026020401101714856	0.7380290310134245	0.054835620810724545	0.08843697531735945	0.02953663826017899	0.005701224992937672	0.07263940088821805	0.03494675084497162	0.08716544023770283	0.006525101954718043	0.0006304129204629032	0.16336545202127806	0.04878234283019729	0.0011700299007641305	0.0013233951931852753	0.04325819551527279	0.01076565451111434	0.0008813160987074031	0.0004256526674233825	0.10982746367059322	0.14277691377224813
Prevotellaceae	0.0032110373647984266	0.0034352947912342727	0.13713671898311153	0.15049831836835448	0.00044533511467379205	0.000879205418103389	0.0007357377242160714	0.3135718551804556	0.0014330924941780617	0.002238550190651643	0.07642044610769551	0.2776694364366062	0.0006966213862765587	0.018102880787436132	0.07173729139429362	0.00260101288120665	0.0025179755476596815	0.3165989510231218	0.0015655853314527504	0.0016990291262135922	0.0005840071877807727	0.0010460103187504418	0.0003633720930232558	0.11928371262279432	0.0008517162081594413	0.015445269016697589	0.17661794131573721	0.02274520115698133	0.015321587244467205	0.00037253362781229627	0.0008298755186721991	0.0027773854916913806	0.00251993035828828	0.005290325894347569	0.02298917302835912	0.001785600408137236	0.25360384410037373	0.00090001406271973	0.0007805112348588326	0.0012783329438770601	0.0010495733256263215	0.0006644614251253087	0.001794949802251293	0.0021481961038196692	0.0004067993607438617	0.011812728059867649	0.0028093076049943246	0.2570957644674963	0.43285237025516965
Enterobacteriaceae	0.024705014749262538	0.036542948341754575	0.0015217521035984962	0.017525995865346047	0.17448786461812513	0.12057478054208509	0.021792551391280036	0.09369756264042547	0.004866543261479668	0.11321280150807592	0.04766996346787846	0.03874851619467526	0.07141820503889469	0.27491301213128116	0.0011228178112743213	0.07994330067158428	0.05101698234619366	0.0055108221910319865	0.017616361071932297	0.13426881067961166	0.05840071877807727	0.05948123542299809	0.051333296064400714	0.01316478305053429	0.00036907702353575786	0.0016542980828695114	0.03757503551299088	0.001124842960236071	0.006934160080829331	0.0014369154215617141	0.01007022023619534	0.05027538483265075	0.013103637863099055	0.006368936028146588	0.001378769847029114	0.001179771698233531	0.004874764966689106	0.1253269582337224	0.009846449424372964	0.007312614259597806	0.08566952130329628	0.11230842565976686	0.011362944934590813	0.005282208227885351	0.01120151096905419	0.08536396808708022	0.013734392735527809	0.004854001905309159	0.007084845343010195
Tannerellaceae	0.11301622418879056	0.01886549389519488	0.008190606910544847	0.017202011786849332	0.000250501002004008	0.006017062080145069	0.014361600376697715	0.016651972355735047	0.007359527079476921	0.04185767533524699	0.11889275000742523	0.009764852184726697	0.02131951700917218	0.023682643177329866	0.058632623240790584	0.18419024551359683	0.02645273200346921	0.009012336559060353	0.024118476727785613	0.012211771844660194	0.014854746930218628	0.0021626970103894266	0.0003913237924865832	0.02451267206602408	0.03423899156800954	0.04897959183673469	0.005132199972506072	0.012037280509539252	0.018767906326556033	0.0006120195314059153	0.014921800191509736	0.028119066672943244	0.0125996517914414	0.0015665528133747657	0.04880845258483063	0.017776289777437664	0.007776410780194526	0.026944171002671918	0.056361917055671465	0.08010886448296244	0.005597724403340381	0.000346675526152335	0.07896257986005475	0.013830851627332117	0.07902077582449513	0.01419382769497186	0.06137911464245176	0.01168892047602486	0.004708830136512874
Acidaminococcaceae	0.0032571288102261555	0.0005439216752787598	0.06695709255833383	0.011046314295411768	0.000403584947673124	0.15813333699668924	0.0006621639517944643	0.05998122920280993	0.006060787006628053	0.026776916156120132	0.015102913659449345	0.08019614493245153	0.022059677232091027	0.029983386100749194	0.014550488348842575	0.012729824947704502	0.11630249279579219	0.04036344832680801	0.002990126939351199	0.002138956310679612	0.0003294399520814615	0.0007067637288854336	0.00041927549194991054	0.04163458873525698	0.02644578826335065	0.0006648113790970934	0.028471490323664635	0.0688053291261285	0.10096746065798397	0.000771676800468328	0.006814554739865943	0.0005962748513235732	0.015379211338159381	0.001078610133799019	0.0005079678383791471	0.019498118742427142	0.002298103484296293	0.03497398396849951	0.08088798162796632	0.02940165770917238	0.0022512587274303706	0.032645278712678215	0.03303924551262549	0.013374727797069037	0.09503123637948568	0.13839755086894676	0.04252270147559591	0.0024799262070738385	0.0007920050688324405
Bifidobacteriaceae	0.0003226401179941003	0.009976668622876201	0.0003133019036820433	0.00026227282544972075	0.07115620129147184	0.049029439643921806	0.0003972983710766786	0.00024174511532664032	0.00010449632770048366	0.004905531039801208	0.0009355787222667736	9.89203549827596e-05	0.0033815163125507954	0.003934045954672267	0.0006921479658540336	0.019954860728834085	0.0002797750608510757	0.0007387161113983896	0.09214386459802539	0.011544296116504855	0.0014375561545372866	0.00033924658986500815	0.04681909660107335	0.002632956610106858	0.005862646566164154	0.010080395794681509	0.0012372267790862852	0.00046746720425395154	0.0007058725830784349	0.002514601987733	0.024225981487392276	0.0006747320686029907	0.0004123522404471731	0.001900408330979224	0.0019883312530840904	0.006823544416810152	0.0006035423292091274	9.843903810997047e-05	0.0018762289299491166	0.02900303775893115	0.004380827793918559	0.2209045342269858	0.16215393976270154	0.021084691895709492	0.03667005666133953	0.0009277011565341084	0.2616061293984109	0.004067683839651601	0.0033840216577386093
Streptococcaceae	0.0012444690265486725	0.03575569328543005	0.0035955123232082114	0.0047980499244037154	0.0024354264083723	0.0020056873600483565	0.0007945967421533572	0.007664742185944654	0.0012240998387770944	0.004284306584979221	0.0022275683863494608	0.02495619241422192	0.004658655520724486	0.0036205761574872263	0.006967622856263939	0.09040240008807662	0.0038608958397448453	0.04701189332939351	0.0013399153737658673	0.0488622572815534	0.07747828691224917	0.054859000636087354	0.0022361359570661895	0.057493918024204727	0.017034324163188827	0.004112554112554113	0.0717133299729643	0.11838606947731323	0.020082767020525666	0.011096180199837682	0.06947015639961698	0.0018515903277942537	0.0022450288646568314	0.001592234007036647	0.001494876781515776	0.002104457623876028	0.004480141136052369	0.00180002812543946	0.009996547738768893	0.011697433712251378	0.0024033708036080986	0.002340059801528261	0.06267112868877396	0.005591195338708728	0.004532907162574459	0.015801843032964315	0.009988649262202044	0.0020565241717197683	0.0007344047001900812
Others	0.08907940019665687	0.0888453115382964	0.026585904398161966	0.12467215896818784	0.015377978178579386	0.14424463890758715	0.06960078871084034	0.044239356104775196	0.0844479608288052	0.020179084015252136	0.18325462591701566	0.05694986151150302	0.03722570532915359	0.022005579762389895	0.05770975928631852	0.21018661235274705	0.03547547771591641	0.03761542439240601	0.011720733427362481	0.013561893203883497	0.04427972446840372	0.02534454731783166	0.05319208407871198	0.19516213469651714	0.04397694688129914	0.1892084106369821	0.09364737509355572	0.06566453384754725	0.12541002892693529	0.141017282899376	0.041062879029684	0.04575624911735631	0.08111121292647916	0.045173219651249416	0.070389829032539	0.15067597729736615	0.04338540820353305	0.06665729152017999	0.0621857316542335	0.07870682189935535	0.13705298063613267	0.10671828280056048	0.15588682689382408	0.05082102289447354	0.02389946244370187	0.03208299833013791	0.01892735527809308	0.05225990836370233	0.05528195380450434
[truncated: 18 more columns]
