# Supplementary material for: Characterization of gut microbiota in adults with coronary atherosclerosis
Source: PeerJ journal article supplement (doi:10.7717/peerj.15245), 2023-05-18
Supplement: Raw_Data.zip [file Figure3C_groups.sample.genus.bar.xls]

	T01	T02	T03	T04	T05	T06	T07	T08	T09	T10	T11	T12	T13	T14	T15	T16	T17	T18	T19	T20	T21	T22	T23	T24	T25	T26	T27	T28	T29	T30	T31	T32	T33	T34	T35	C01	C02	C03	C04	C05	C06	C07	C08	C09	C10	C11	C12	C13	C14
Bacteroides	0.510370575221239	0.4531296966920974	0.2669630602136421	0.11097226079175537	0.46149242930305057	0.09129998763617381	0.35597934048470403	0.03181081311680555	0.13085925837463427	0.29915170729617413	0.13277792628233687	0.03244587643434515	0.2970074306281203	0.2295539324786057	0.1238175805583327	0.17382747990751954	0.248636096578351	0.05810740932259732	0.5141607898448519	0.254808859223301	0.34654088050314463	0.009301010672132307	0.48264199463327373	0.17916422874387952	0.2460324219969906	0.1612708719851577	0.09273091081275107	0.22258743097554562	0.25263318154766023	0.008275568446401725	0.352345994254708	0.415274051059957	0.25646782125293993	0.5265158324558925	0.14401613886389364	0.22422039410751865	0.06476473455744099	0.40002812543946	0.2247121864821458	0.2838723866338607	0.19458176784654935	0.26813907466524145	0.2108457560085184	0.46162674357012534	0.4875490338515182	0.43088626383820894	0.3659477866061294	0.07476070224251864	0.09504060825989287
Faecalibacterium	0.018467305801376597	0.0908492334998497	0.0548725905591693	0.20204264247585546	0.000848920062346916	0.0021980135452584725	0.21049456289821805	0.2308665851369415	0.09752492983817997	0.060183796752495605	0.0243844486025721	0.11333446385167599	0.18064263322884014	0.03057897871540077	0.2693224640467584	0.0023670593416272156	0.008169431776851411	0.20217182536751127	0.0667277856135402	0.08709041262135922	0.01076669661575322	0.4989610573185384	0.06427493291592129	0.1262279432143627	0.14280441756806633	0.1054421768707483	0.1326582046464739	0.17407310018406522	0.001273338777317961	0.0021021540426551005	0.11311841685285669	0.12975254593670071	0.21695836769602003	0.037391817971699326	0.29123973179298135	0.15981123652828264	0.21481464286543328	0.002264097876529321	0.07757080887981628	0.00771123420983904	0.14654477418962292	0.001805601698710078	0.02442957103742014	0.12746454005061503	0.08335028330669766	0.04364833941492981	0.02891600454029512	0.08191317233974989	0.11232071885260066
Prevotella_9	0.0006606440511307767	0.0009303923392926155	0.13713671898311153	0.1503748958622605	0.00041750167000668005	0.0007830423254983308	0.0006621639517944643	0.2667017434088905	0.0010897474174479012	0.0017565656998414806	0.05023909234013484	0.22091741563506867	0.0005079530941599907	0.0007366540233848469	0.0657079135584096	0.0013211493999779808	0.0013289315390426098	0.2718918519612913	0.0014245416078984485	0.0015625	0.0005390835579514825	0.0004523287864866775	0.0002934928443649374	0.10283928186493395	0.000723958776935525	0.0011440940012368583	0.1414562617421986	0.022628334355917844	0.000581306833123417	0.0002261811311717513	0.0006383657835939994	0.0021497277534560403	0.0010537890589205534	0.0026194817535119034	0.021973237351600824	0.0009884573687902558	0.2405812576893614	0.00025312895513992405	7.504915719796467e-05	0.0008522219625847067	0.0008518276265952754	0.0005633477299975444	0.0009126863401277761	0.0004414101583191101	0.00037774226354787154	0.0001855402313068217	0.0001844494892167991	0.22862197758993513	0.43213236564714014
uncultured_bacterium_f_Lachnospiraceae	0.030589355948869225	0.00161745129753947	0.0966909351315868	0.030747631830664323	0.021042084168336674	0.27964227329550917	0.0957194779205109	0.019609794943261	0.02858720964948946	0.01501649458035217	0.006801508806320354	0.03125883217455203	0.019316730523627076	0.06404187956490393	0.06281627316773053	0.0267119894308048	0.09397644293987634	0.03350816281303095	0.013187588152327222	0.010709951456310679	0.07282120395327943	0.06041416354512687	0.005786001788908765	0.020478551411942228	0.025324361922607386	0.03098330241187384	0.01991782370282118	0.01783679551231484	0.2986256245588296	0.03322201673740371	0.02992339610596872	0.016523089959045334	0.026024008063777148	0.06741313336243869	0.04451249600882413	0.061555385498373826	0.05612943661644885	0.09035297426522289	0.02470618254956997	0.06859012247254333	0.02640665642445354	0.016207080847621663	0.004502585944630362	0.06987522806191514	0.017695772192357982	0.04066423402807842	0.007562429057888763	0.026538234715942598	0.015494499164794655
Megamonas	0.0005070058997050147	0.0005725491318723788	0.15930655845318376	0.011740565892190441	0.000292251169004676	0.0015248718970230653	0.0005297311614355715	0.08711356332299991	0.2648384785334687	0.20073047427273896	0.27419881790370965	0.0009609405912610932	0.0005079530941599907	0.003338453340020689	0.0005844805044989618	0.006096554001981724	0.0006994376521276893	0.0004136810223830982	0.0012693935119887166	0.31949332524271845	0.0001497454327643007	0.0013852569086154499	8.38550983899821e-05	0.002263418840267299	0.017673111319308408	0.0016079158936301793	0.03653637599474561	0.001957518917813422	0.0013425419717374154	0.7374968401165498	0.005729332907756144	0.08537714384346216	0.028437032285653197	0.000950204165489612	0.0007837218077849699	0.003427715069192016	0.00011606583254021681	0.0012656447756996202	1.5009831439592933e-05	0.00023367376393451636	0.00016732328379550054	0.00013000332230712563	0.000608457560085184	0.0002795597669354364	0.0	0.0004483888923248191	4.256526674233825e-05	0.029743992983623416	0.0006048038707447727
Subdoligranulum	0.004563053097345133	0.05815667806993688	0.04004296711821925	0.04182480175259959	0.00011133377866844801	0.0002884892778151745	0.0006621639517944643	0.013694149768209095	0.16634322565235565	0.04638832954886252	0.001247438296355698	0.03566785371092646	0.051999883896435624	0.0004545312059183098	0.05558717219103284	0.0005229549708246174	0.04041350753993789	0.021969417152988106	0.08440056417489422	0.0014108009708737863	0.00037436358191075174	0.001724503498480458	0.0010342128801431128	0.03766205770948172	0.11184453340147063	0.08413729128014842	0.04730483129420031	0.03624331667981418	0.00047058172205228995	0.0003060097657029576	0.06714012128949888	0.05084027679706256	0.03425578056751886	0.03985721256323994	0.06825636411134656	0.05044321152987692	0.014090392070382322	0.00035156799324989455	0.16153580595289915	0.0003986199502412338	0.02800383322431968	0.0006644614251253087	0.10891390325524794	0.057913012771467244	0.011956995496149935	0.000216463603191292	0.0008087400681044268	0.058958733423054244	0.032357007084845346
Roseburia	0.0178834808259587	0.017920787827605457	0.04599570328817808	0.01425529945385541	0.012789467824537964	0.0006731416482354072	0.0005738754248885358	0.021515315264070987	0.04909834597241297	0.007904545649286663	0.0008613264427217916	0.0022610366853202195	0.07909555323348427	0.1317200087771543	0.03469968468814889	0.003013872068699769	0.028425146182469295	0.020359016030139617	0.005669957686882934	0.008464805825242719	0.1640011979634621	0.0011590925153721111	0.065616614490161	0.04391340498260093	0.099097180819351	0.009910327767470625	0.06627564190685668	0.044380167703859524	0.0006505100275428714	0.0007982863453120634	0.025167571018193426	0.040813444428753	0.051055316289440725	0.12005958036929557	0.023192360163710776	0.027820292073209615	0.024838088163606397	0.10622978484038813	0.02598201822193537	0.000384874434715674	0.03241508343347378	0.0006066821707665863	0.0010648007301490721	0.01622918015419928	0.0008862414644776987	0.08653905621869008	0.000666855845629966	0.01422933268814928	0.01828811704394908
Parabacteroides	0.11301622418879056	0.01886549389519488	0.008190606910544847	0.017202011786849332	0.000250501002004008	0.006017062080145069	0.014361600376697715	0.016651972355735047	0.007359527079476921	0.04185767533524699	0.11889275000742523	0.009764852184726697	0.02131951700917218	0.023682643177329866	0.058632623240790584	0.18419024551359683	0.02645273200346921	0.009012336559060353	0.024118476727785613	0.012211771844660194	0.014854746930218628	0.0021626970103894266	0.0003913237924865832	0.02451267206602408	0.03423899156800954	0.04897959183673469	0.005132199972506072	0.012037280509539252	0.018767906326556033	0.0006120195314059153	0.014921800191509736	0.028119066672943244	0.0125996517914414	0.0015665528133747657	0.04880845258483063	0.017776289777437664	0.007776410780194526	0.026944171002671918	0.056361917055671465	0.08010886448296244	0.005597724403340381	0.000346675526152335	0.07896257986005475	0.013830851627332117	0.07902077582449513	0.01419382769497186	0.06137911464245176	0.01168892047602486	0.004708830136512874
Phascolarctobacterium	0.0032571288102261555	0.0005439216752787598	0.06695709255833383	0.011046314295411768	0.000403584947673124	0.15813333699668924	0.0006621639517944643	0.05998122920280993	0.006060787006628053	0.000814018251146052	0.015073212747631352	0.08019614493245153	0.022059677232091027	0.029983386100749194	0.014550488348842575	0.012729824947704502	0.11630249279579219	0.04036344832680801	0.002990126939351199	0.002138956310679612	0.0003294399520814615	0.0007067637288854336	0.00041927549194991054	0.04163458873525698	0.02644578826335065	0.0006648113790970934	0.028471490323664635	0.0688053291261285	0.10096746065798397	0.000771676800468328	0.006814554739865943	0.0005962748513235732	0.0152875775069489	0.001078610133799019	0.0005079678383791471	0.019498118742427142	0.002298103484296293	0.03497398396849951	0.08088798162796632	0.02940165770917238	0.0022512587274303706	0.032645278712678215	0.03303924551262549	0.013374727797069037	0.09503123637948568	0.13839755086894676	0.04252270147559591	0.0024799262070738385	0.0007920050688324405
Escherichia-Shigella	0.024459193706981318	0.036342556145599246	0.0014769946887867756	0.014394149773211145	0.15798263193052772	0.11002431552484442	0.021174531702938537	0.00992577002929382	0.003224458111900639	0.028512060323036718	0.04728385161424456	0.03832457181617772	0.008780332056194126	0.10571768910065515	0.0007998154272091056	0.043308928768028186	0.05073720728534258	0.0016842727339883283	0.01688293370944993	0.09217233009708738	0.026534890685834082	0.05355855537493816	0.051207513416815745	0.009761956086595018	0.0002413195923118417	0.0007884972170686456	0.020360781438543432	0.001051801209571391	0.006823434969758204	0.0005854099865621799	0.004005745292052346	0.048565017495959456	0.006185283606707596	0.004982151570404992	0.001103015877623291	0.000892800204068618	0.003273056477634114	0.0004359443116298692	0.009711360941416627	0.006982721886984371	0.0021447802741059612	0.09039564344422135	0.010267721326437482	0.004693661350126537	0.004300450385006538	0.07129383387964623	0.011223041997729853	0.0010585050883851748	0.006307240366338345
Others	0.2762260324483777	0.3210712394257333	0.12236677209524373	0.3953994260853466	0.3443692941438427	0.3494154657728082	0.29918038817522385	0.2421290634509825	0.24501403236400562	0.2976843322908193	0.32823962695654735	0.4348680119834947	0.31876233600371534	0.3801918435158775	0.313481504268246	0.5459099416492347	0.3848585737067396	0.3405185787102016	0.26916784203102995	0.2099362864077669	0.3630877508235996	0.37017457064103493	0.32825078264758506	0.4115418963446554	0.29557391477159756	0.555071119356834	0.4091554781652383	0.3983989248254304	0.3178641126074376	0.21560383709636663	0.3801947015639958	0.18198936120133719	0.3516753718806318	0.1975654228408538	0.3556065135990252	0.43356609910082217	0.3713178114626617	0.3369005765715087	0.3384416792999415	0.5214636224931625	0.5610349705663142	0.5884961504571787	0.5264526924247034	0.2342710846918958	0.21983146883626314	0.17352650132970526	0.48074631101021575	0.47000650224554313	0.28195380450434854
[truncated: 18 more columns]
