# Supplementary material for: Characterization of gut microbiota in adults with coronary atherosclerosis
Source: PeerJ journal article supplement (doi:10.7717/peerj.15245), 2023-05-18
Supplement: Raw_Data.zip [file Table1_groups.alpha_diversity.xls]

Sample ID	Feature	ACE	Chao1	Simpson	Shannon	PD_whole_tree	Coverage
C01	273	290.8420	295.8947	0.9348	5.0405	16.0473	0.9995
C02	290	309.0061	312.0000	0.8818	4.5099	16.5482	0.9992
C03	204	236.0401	229.1613	0.8633	3.8608	13.9861	0.9994
C04	257	291.0654	294.2727	0.9548	5.3920	16.0908	0.9994
C05	226	268.1252	295.7895	0.9366	4.7580	14.7515	0.9993
C06	257	303.9131	324.5625	0.9428	5.0079	15.9863	0.9993
C07	212	272.7899	271.6250	0.8983	4.2171	14.8942	0.9992
C08	227	275.0451	278.2727	0.9494	5.0843	15.2998	0.9993
C09	243	276.0522	270.8571	0.8871	4.4419	14.8870	0.9994
C10	207	356.8915	311.0000	0.9205	4.5149	14.0542	0.9991
C11	201	242.9574	240.0000	0.9154	4.5125	13.3813	0.9994
C12	202	240.1661	228.4516	0.9125	4.4049	14.1762	0.9994
C13	290	342.7245	350.7143	0.9179	4.9067	17.2499	0.9992
C14	234	253.1619	259.5882	0.7801	3.5355	15.7092	0.9996
C15	241	285.2968	302.8947	0.9485	4.9853	15.8396	0.9993
C16	246	297.2452	311.6190	0.9248	4.7528	15.3488	0.9992
C17	264	285.5748	288.1667	0.9496	5.3214	15.6530	0.9995
C18	260	285.9864	286.2500	0.8727	4.1340	16.1301	0.9995
C19	237	306.6656	313.9565	0.9196	4.6072	14.5407	0.9991
C20	191	231.4342	238.5263	0.8925	4.3204	12.4887	0.9994
C21	225	266.3185	307.5000	0.9187	4.5877	14.7927	0.9993
C22	237	280.0025	270.1154	0.9414	5.0718	15.0834	0.9993
C23	207	286.2579	259.1053	0.8869	4.3311	13.3680	0.9994
C24	175	300.2553	222.7000	0.7909	3.2325	12.1838	0.9993
C25	212	257.2288	281.4615	0.9166	4.6075	13.4883	0.9994
C26	224	260.0689	294.9091	0.9427	5.0091	13.9926	0.9994
C27	210	235.6263	234.8000	0.8464	4.0363	13.7752	0.9996
C28	222	247.9028	251.1765	0.9487	5.2033	13.8811	0.9995
C29	232	278.7044	288.8947	0.8997	4.2866	14.6025	0.9993
C30	183	262.4907	226.0000	0.9163	4.3046	12.8240	0.9994
C31	220	279.7400	253.1579	0.9475	5.1867	14.2590	0.9994
C32	198	222.7091	215.1818	0.7242	3.2561	13.0805	0.9996
T01	233	285.8173	284.0000	0.8875	4.3207	15.3138	0.9992
T02	208	250.3030	261.4545	0.9201	4.4877	13.9641	0.9993
T03	196	229.8212	231.0000	0.9447	4.7865	12.6009	0.9995
T04	255	288.0958	286.2000	0.9209	4.8768	15.6513	0.9994
T05	181	228.8540	230.2857	0.8737	3.8387	11.6718	0.9994
T06	193	223.4405	221.5000	0.8994	3.9566	12.9926	0.9995
T07	201	232.4569	226.5517	0.8973	4.0860	13.9911	0.9994
T08	250	286.3188	291.0455	0.8996	4.3869	15.8656	0.9994
T09	258	277.7884	282.3913	0.8904	4.3106	16.0328	0.9995
T10	320	351.2839	343.0233	0.9258	4.6877	18.8597	0.9995
T11	237	279.4707	280.2400	0.9258	4.4832	15.1500	0.9993
T12	247	293.4005	290.7500	0.9217	4.5560	14.8348	0.9993
T13	258	293.8879	301.0000	0.9297	4.8153	15.3586	0.9994
T14	249	290.4147	296.1429	0.9195	4.6661	15.1086	0.9993
T15	278	299.6671	298.3077	0.9085	4.9677	16.3743	0.9995
T16	250	293.8039	289.2000	0.9245	4.6684	15.5724	0.9993
T17	249	274.8216	273.3913	0.9273	4.7518	15.0100	0.9995
T18	292	318.2019	329.0500	0.9028	4.6617	17.1114	0.9994
T19	225	269.5604	270.5357	0.8577	3.7451	13.5920	0.9993
T20	246	281.8165	291.1200	0.8451	3.6495	14.9914	0.9993
T21	208	224.7810	222.7727	0.9271	4.6549	12.9879	0.9996
T22	238	276.5949	277.6000	0.7346	3.3423	15.1812	0.9994
T23	215	271.7018	288.3333	0.9003	4.2367	14.0356	0.9992
T24	277	304.8143	306.6400	0.9500	5.3081	15.9325	0.9994
T25	240	284.0827	280.1818	0.9279	4.6750	15.2721	0.9993
T26	278	310.8838	309.2000	0.9617	5.6036	16.3485	0.9994
T27	249	274.9510	282.3000	0.9360	4.8982	15.1733	0.9994
T28	261	282.6251	292.1667	0.9351	4.9426	15.4549	0.9995
T29	230	263.7986	254.3750	0.8882	4.2488	14.3024	0.9994
T30	210	256.3151	274.5652	0.4368	1.6926	13.9089	0.9993
T31	271	283.9490	281.7143	0.9447	5.2480	16.3290	0.9996
T32	259	303.3195	297.8966	0.9392	4.8109	15.7337	0.9992
T33	274	295.4530	295.1200	0.9014	4.5790	16.7906	0.9995
T34	282	316.2686	319.6000	0.8470	4.1915	17.0516	0.9988
T35	249	294.4271	315.3529	0.8956	4.6937	15.8641	0.9993
